# Supplementary material for: Global glacier changes: a revised assessment of committed mass losses and sampling uncertainties
Source: Copernicus journal article supplement (doi:10.5194/tc-7-1565-2013), 2013-10-02
Supplement: Supplementary file 1 [file Mernild_etal_TC.auxiliary_data.xls]

## Sheet: A. AAR and mass balance
Name	Glacier/ice cap	Country	Location	Area (km2)	Log Area (km2)	Data to right	1971	1972	1973	1974	1975	1976	1977	1978	1979	1980	1981	1982	1983	1984	1985	1986	1987	1988	1989	1990	1991	1992	1993	1994	1995	1996	1997	1998	1999	2000	2001	2002	2003	2004	2005	2006	2007	2008	2009	2010
n=144
Aalfotbreen	Ice cap outlet	Norway	61.75N; 5.65E	4.5	0.653213	AAR	75	61	100	90	92	100	34	30	47	35	57	46	96	92	30	42	100	0	94	96.9	94	92	100	99	79	0	60	66	64	96	0	0	0	53	78	0	97	79	48	0
Abramov	Glacier	Kirgizstan	39.63N; 71.6E	25.9	1.4133	AAR	37	74	24	40	29	24	5	6	46	26	57	42	48	15	42	28	64	54	50	46	46	68	66	44	46	48	12	64
Alexander	Glacier	Canada	57.1N; 130.82W	5.8	0.763428	AAR									33	42	59.9	0	0	53.8					21	16
Andrei	Glacier	Canada	56.93N; 130.97W	92	1.96379	AAR								45	22	65	63.8	35.6	43.3	63.1					47	33
Antizana15Alpha	Glacier	Equador	0.47S; 78.15W	0.3	-0.522879	AAR																									45	60	62	65	84	80	60	50	42	56	55	54	53	85	54	54
Austdalsbreen	Ice cap	Norway	61.80N; 7.35E	11.8	1.07188	AAR																		22	80	77	70	80	87	69	80	30	70	71	68	87	0	0	0	46	78	0	75	71	56	0
Austre Broggerbreen	Glacier	Norway (Spitsbergen)	78.88N; 11.83E	6.2	0.792392	AAR	23	32	60	2	35	20	45	20	2	17	14	56	34	6	14	25	83	15	15	8	58	39	0	48	8	49	7	0	14	31	7			0	0	5	10	25	16	13
Baby	Glacier	Canada	79.43N; 90.97W	0.6	-0.221849	AAR	1	100			99	83
Bahia Del Diablo	Glacier	Antarctica	63.82S; 57.43W	14.3	1.15534	AAR																														31	50	30	40	44	38	41	49	33	43
Basodino	Glacier	Switz.	46.42N; 8.48E	2.3	0.361728	AAR																						57	55	67	70	62	51	0	5	15	76	48	0	33	5	0	5	2	70	30
Bench	Glacier	Canada	51.43N; 124.92W	10.3	1.01284	AAR											48.6	21.8	49.9	57.7					34	31
Blue	Glacier	US	47.82N; 123.68W	4.3	0.633468	AAR	74	72	52	84	72				34	33	32	62	69	60	58	40	53	74	56	45	53	45	42	34	69	53	59	47	92
Bondhusbreen	Glacier	Norway	60.03N; 6.33E	10.2	1.0086	AAR							29	67	66	67
Breidalblikkbrea	Glacier	Norway	60.10N; 6.40E	3.6	0.556303	AAR																																	0	17	48	0	70	44	30	0
Breidamjok. E.B.	Ice cap	Iceland	64.22N; 16.33W	540	2.73239	AAR																												47		48	51	53	60	50	38
Brewster	Glacier	New Zealand	44.07S; 169.43E	2.5	0.39794	AAR																																			88	72	67	10	26
Bruarjokull	Ice cap	Iceland	64.67N; 16.17W	1600	3.20412	AAR																								67	52	53		45	62	42	66	59	52	49	24	50	54	51	59	14
Calderone	Glacier	Italy	42.47N; 13.62E	0.1	-1	AAR																															22	0	21	100	21	100	0	75	86	84
Careser	Glacier	Italy	46.45N; 10.70E	2.1	0.322219	AAR	17	82	3	25	67	9		64	32	54				3	3	0	0	0	3	0	0	0	14	19	0	0	2	0	0	0	12	1	0	0	0	0	0	0	1	10
Charquini Sur	Glacier	Bolivia	16.17S; 68.09W	0.3	-0.522879	AAR																																	26	4	0	39	38	93	29	10
Chhota Shigri	Glacier	India	32.2N; 77.5E	15.7	1.1959	AAR																																	31	31	74	29
Ciardoney	Glacier	Italy	45.52N; 7.40E	0.8	-0.09691	AAR																						18	41	4	23	23	25	0	0	0	75	30	0	0	0	0	0	0	15	10
Columbia (2057)	Glacier	US	47.97N; 121.35W	0.9	-0.0457575	AAR																61	50	60	67	67					55	54	84	20	94	85	20	86	23	12	6	40	60	86	37	63
Daniels	Glacier	US	47.57N; 121.17W	0.4	-0.39794	AAR																60	40	60	60	50					70	75	80	13	95	60	13	64	21	22	18	34	62	76	28	60
Devon NW	Ice cap	Canada	75.42N; 83.25W	1667	3.22194	AAR	52	86	62	49	56	95	47	68	68	42	35	59	79	59	47	83	62	34	49	45	27	84	50	65.7543	45	28	56	29	35	23	18	60	40	65	34	28	24	16	15	22
Djankuat	Glacier	Russia	43.20N; 42.77E	3	0.477121	AAR	56	42	44	74	49	57	48	65	49	64	45.3	66.8	55.2	64	44.4	50	80	74	66	63	55	60	79	44	62	62	67	33	49	26	43	43	43	43	43	42	16
Dyngjujokull	Ice cap outlet	Iceland	64.67N; 17.0W	1050	3.02119	AAR																						75	86	71	66	58	47	59							37					22
Easton	Glacier	US	48.75N; 120.83W	2.9	0.462398	AAR																									62	66	72	44	90	68	44	74	46	50	38	50	70	74	38	77
Emmons	Glacier	US	46.85N; 121.72W	11.6	1.06446	AAR																																	11			40	51	36
Engabreen	Ice cap	Norway	66.65N; 13.85E	39.6	1.5977	AAR	78	65	94	83	89	92	86	43	68	39	89	83	84	86	12	61	86	7	93	84	75	94	87	76	91	88	85	74	51	89	0	54	55	83	80	26	84	77	63	47
Eyjabakkajokull	Ice cap	Iceland	64.65N; 15.58W	110	2.04139	AAR																								61	44	53		29	45	21	60	47	39	37	25	36	47	39	42	18
Filleck K.	Glacier	Austria	47.13N; 12.6E	0.15	-0.823909	AAR	16	65	2	98	100	89	82	100	73	100
Findelen	Glacier	Switz.	46.0N; 7.87E	15.3	1.18469	AAR																																			62	40	62	61
Fontana Bianca	Glacier	Italy	46.48N; 10.77E	0.5	-0.30103	AAR																					0	10	13	19	0	0	6	0	0	5	95	10	0	0	0	0	0	0	9
Foss	Glacier	US	47.55N; 121.20W	0.3	-0.522879	AAR																71	57	71	64	57					75	75	80	10	100	70	10	70	25	10	0	36	54	72	12	62
Garabashi	Glacier	Russia	43.30N; 42.47E	4.5	0.653213	AAR														70	52	38	73	74	60	65	54	66	80	48	55	55	66	13	34	27	42	67	61	66	66	40	42	50	52
Goldbergkees	Glacier	Austria	47.03N; 12.47E	1.4	0.146128	AAR																															18	20	0	52	51	7	24	20	21	27
Golubin	Glacier	Kirgizstan	42.47N; 74.5E	5.7	0.755875	AAR		80	74	42	58	49	67	67	67	58	84.9	64.4	65.9	75.3	49.7	41.5	77	67	67	52	67	63	63	73
Graafjellsbrea	Glacier	Norway	60.10N; 6.40E	8.9	0.94939	AAR																																	0	24	67	0	80	56	31	0
Graasubreen	Glacier	Norway	61.65N; 8.60E	2.3	0.361728	AAR	9	3	0	100	0	0	0	24	52	5	14	0	39	0	36	0	100	10	65	65	10	22	100	44	16	9	0		9		45	0	0	7	13	0	1		7	4
Gries	Glacier	Switz.	46.44N; 8.34E	5	0.69897	AAR	45	74	8	61	71	25	94	81	16	75	54	10	24	61	19	11	21	25	20	0	17	25	12	51	49	39	9	0	46	23	48	20	0	2	1	2	2	5	3	11
Gulkana	Glacier	US (Alaska)	63.25N; 145.42W	15.5	1.19033	AAR	63	54	72	38	58	55	62	62	59	64	69	63	63	61	73	70	64	62	58	58	68	63	45	60	56	61	46	58	52	68	57	51	66	48	56	64	53	66	56	43
Hamtah	Glacier	India	32.24N; 77.37E	3.4	0.531479	AAR																															8	11	11	7		12
Hansbreen	Ice cap	Norway (Spitsbergen)	77.08N; 15.67E	56.7	1.75358	AAR																			45	32	62	45	31	71	25			25	39	0	0	25	25	25	65	61	54	60	25	39
Hansebreen	Glacier	Norway	61.75N; 5.68E	3.1	0.491362	AAR																38	76						63	100	66	0	50	64	70	81	0	0	0	31	53	0	89	64	0	0
Hardangerjokulen	Ice cap	Norway	60.53N; 7.37E	17.1	1.233	AAR	84	77	84	82	81	81		85.7335	37.8083	89.8247	84	20	92	87.3407	57	83	87	83.6879	92	92	75	88	92	82	85	0	74	84	72	92	42	47	0	75	84	0	85	82	79	0
Hellstugubreen	Glacier	Norway	61.57N; 8.43E	3	0.477121	AAR	59	29	54	74	29	23	8	52	68	12	29	42	68	25	54	33	81	15	84	87	29	62	83	59	53	38	0	68	55	66	48	7	0	23	39	0	25	57	42	0
Helm	Glacier	Canada	49.97N; 123.00W	0.8	-0.09691	AAR						77	13	13	0	9			38.7	18.9	0		10	7	6	8	8	0	0	0	0	47	22	0	68	57	23			0	0	0	12	2	12
Hidden	Glacier	Canada	58.93N; 63.55W	0.85	-0.0705811	AAR												41	47	25
Hintereisferner	Glacier	Austria	46.80N; 10.77E	7.1	0.851258	AAR	49	66	24	68	71	58	78	77	59	67	64	22	39	63	50	40	45	29	38	32	18	24	48	31	53	41	48	25	39	48	64	51	3	32	29	11	0	22	25	25
Hoegtuvbreen	Glacier	Norway	66.45N; 13.65E	2.6	0.414973	AAR	42	37	83	54	78	79	54
Hofsjokull E (Thjorsarjokull)	Ice cap outlet	Iceland	64.80N; 18.58W	235.9	2.37273	AAR																			70	53	45	72	63	59	47	31	30	30	50	40	30	43	35	37	54	46	44	46	50
Hofsjokull N (Satujokull)	Ice cap outlet	Iceland	64.95N; 18.92W	81.5	1.91116	AAR																		39	58	38	19	67	64	50	38	36	31	35	51	30	40	38	33	30	42	41	51	38	49
Hofsjokull SW (Blagnipujokull)	Ice cap	Iceland	64.72N; 19.05W	51.5	1.71181	AAR																				34	29	52	45	34	27	24	18	12	33	20	20	51	47	24	51	50	45	46	54
Hurd	Glacier	Antarctica	62.68S; 60.40W	4.7	0.672098	AAR																																36	11	54	41	20	22	69	34	77
Ice Worm	Glacier	US	47.55N; 121.17W	0.1	-1	AAR																50	30	65	50	40					70	70	75	20	100	60	0	72	0	0	0	20	48	60	35	60
IGAN	Glacier	Russia	67.61N; 66.03E	0.8	-0.09691	AAR	31	42	65	11	86	4	5	80	32	86	17
Irenebreen	Glacier	Norway (Spitsbergen)	78.65N; 12.10E	4.1	0.612784	AAR																																29	25	27	10	24	20	31	6
Ivory	Glacier	New Zealand	43.13S; 170.92E	0.9	-0.0457575	AAR	35	16	32	0	0
Jamtalferner	Glacier	Austria	46.87N; 10.17E	3.3	0.518514	AAR																			34	32	10	7	44	18	63	34	56	9	47	62	61	28	0	40	15	8	6	9	10	9
Johnsons	Glacier	Antarctica	62.66S; 60.35W	5.6	0.748188	AAR																																55	39	66	76	43	42	67	37	93
Jostefonn	Glacier	Norway	60.53N; 7.37E	3.8	0.579784	AAR																										0	63	76	79	90
Karsojietna	Glacier	Sweden	68.35N; 18.32E	1.2	0.0791812	AAR												61	68							71	55	91	99
Kesselwandferner	Glacier	Austria	46.83N; 10.79E	3.8	0.579784	AAR	81	85	63	87	86	81	87	80	75	79	77.8	33.7	66.3	77.5	75.1	52	65	56	66	60	21	51	73	33	78	55	74	18	72	74	87	75	0	61	66	33	22	42	28	26
Kleinfleisskees	Glacier	Austria	47.05N; 12.95E	0.9	-0.0457575	AAR																															51	13	0	75	63	10	23	24	26	48
Koeldukvislarj kull	Ice cap	Iceland	64.58N; 17.83W	310	2.49136	AAR																									47	48		35	61	47	47	56	52	46	46	54	59	51	57	8
Kongsvegen	Ice cap	Norway (Spitsbergen)	78.80N; 12.98E	101.9	2.00817	AAR																	82	63	53	50	73	68	22	78	28	59	45	8	54	63	13	31	25	5	19	46	39	67	40	52
Koryto	Glacier	Russia	54.68N; 161.0E	7.5	0.875061	AAR												63														83	90	43	85	45
Kozelskiy	Glacier	Russia	53.23N; 158.82E	1.8	0.255273	AAR			77	75	75	73	30	30	29	57	24.2	60	54	51	83	58	45	6	24	37	67	45	47	37	45	68	70
La Conejera	Glacier	Colombia	4.48N; 75.22W	0.2	-0.69897	AAR																																				1	8	73	4	2
Langfjordjokelen	Glacier	Norway	70.12N; 21.77E	3.7	0.568202	AAR																			53	53	67	68	64			77	58	0	45	44	0	0	0	0	28	0	42	53	0	12
Langjokull S. Dome	Ice cap	Iceland	64.62N; 18.07W	900	2.95424	AAR																											30	10	40	43	28	28	23	33	41	41	27	28	50	0
Lemon Creek	Glacier	US (Alaska)	58.38N; 134.40W	11.6	1.06446	AAR																									38	5	5	7	68	82	77	67	5	59	61	68	72	80	64	50
Leviy Aktru	Glacier	Russia	50.08N; 87.72E	6	0.778151	AAR							66	49	45	60	57	49	67	68	61	60	62	66	58	61	46	56	72	56	67	61	60	44	60	58	58	56	56	57	62	58	57		67
Limmern	Glacier	Switz.	46.82N; 8.98E	2.5	0.39794	AAR						10	72	93	44	92	44.7	24.8	16	31.7	66.3			42	44
Lower Curtis	Glacier	US	48.83N; 121.62W	0.8	-0.09691	AAR																62	50	69	56	50					60	60	70	30	85	60	25	68	35	30	20	40	60	66	20	58
Lynch	Glacier	US	47.57N; 121.18W	0.6	-0.221849	AAR																69	62	75	69	62					70	75	80	25	90	60	25	65	38	20	15	42	70	76	25	56
Maarmaglaciaren	Glacier	Sweden	68.05N; 18.41E	4	0.60206	AAR																				26	25	51	54	23	59	19	15	23	15	22	24	15	6	14	15	11	13	43	15	18
Maladeta	Glacier	Spain	42.65N; 0.64E	0.3	-0.522879	AAR																						26	35	49	31	41	50	22	20	9	69	10	0	0	0	51	53	34	0	80
Malavalle	Glacier	Italy	46.95N; 11.12E	6.2	0.792392	AAR																																39	26	47	37	12	9	9	36	42
Maliy Aktru	Glacier	Russia	50.08N; 87.75E	2.7	0.431364	AAR	83	75	76	22	89	90	87	38	36	80	59	34	82	84	82	71	77	83	76	73	28	67	76	67	75	68	68	27	72	61	61	50	53	63	72	60	55		82
Martial Este	Glacier	Argentina	54.78S; 68.40W	0.1	-1	AAR																															100	0	40	0	13	38	62	56	51
Marukh	Glacier	Russia	43.36N; 41.42E	0.18	-0.744727	AAR						53	31	47	41	5
McCall	Glacier	US (Alaska)	69.28N; 143.83W	7.6	0.880814	AAR	48	47																					30	22	18	58	50	30	44	55
Midtre Lovenbreen	Glacier	Norway (Spitsbergen)	78.88N; 12.07E	5.5	0.740363	AAR	37	46	58	2	48	29	60	29	9	30	23	62	52	21	20	42	77	27	41	19	68	40	0	66	6	58	36	30		36	18			0	5	14	26	38	29	29
Minaret	Glacier	Canada	58.88N; 63.68W	0.9	-0.0457575	AAR												47	58	41
Mittivakkat	Glacier	Greenland	65.67N; 37.83W	17.6	1.24551	AAR																										56	41	0	18	5	0	41	75	5	0	18	0	41	18	0
Mutnovskiy NE	Glacier	Russia	52.46N; 158.22E	1.4	0.146128	AAR											59	74	67	75
Mutnovskiy SW	Glacier	Russia	52.45N; 158.19E	1.1	0.0413927	AAR											61	83	66	71
Nigardsbreen	Ice cap	Norway	61.72N; 7.13E	47.8	1.67943	AAR	87	61	86	76	81	66	40	56	75	23	63	55	82	75	56	56	90	37	94	82.5	73	89	92	87	91	55	83	93	90	93	64	25	0	70	87	4	91	91	80	14
No. 125 (Vodopadniy)	Glacier	Russia	50.10N; 87.70E	0.8	-0.09691	AAR							74	58	9	61	64	22	71	74	73	71	71	77	73	73	15	72	80	68	72	68	66	0	71	67	69	66	64	66	71	67	67		85
No. 104	Glacier	Russia	79.37N; 95.65E	1817	3.25935	AAR																35	30	67
No. 356	Glacier	Russia	41.83N; 78.18E	3.6	0.556303	AAR															42	38	56	27	37
Noisy Creek	Glacier	US	48.67N; 121.53W	0.5	-0.30103	AAR																							0	9	68	64	100	0	100	97	0	83	0	0	0	0	1	20	0	30
North Klawatti	Glacier	US	48.57N; 121.12W	1.5	0.176091	AAR																							45	0	66	74	75	18	79	84	0	72	0	19	3	19	50	70	0	70
Obrucheva	Glacier	Russia	67.63N; 65.8E	0.3	-0.522879	AAR	48	73	62	30	68	20	16	81	44	81	25
Ochsentaler	Glacier	Switz.	46.85N; 10.1E	2.6	0.414973	AAR																					42	21	60	34	63	59	66	36	65
Pendente	Glacier	Italy	46.96N; 11.23E	0.9	-0.0457575	AAR																										10	60	5	10	0	61	0	0	9	2	0	0	0	7	24
Peyto	Glacier	Canada	51.67N; 116.53W	11.5	1.0607	AAR	39	43	62	58	35	68	52	23	29	38	26	38	46	36	28	40	47	34	39	38	13		14	27	42	62	34	0	51	73	26	37	0	29	21	10	40	41	18
Place	Glacier	Canada	50.43N; 122.60W	3.2	0.50515	AAR	25	42	26	77	42	87	17	27	0	15	13	35	37	35	3		31	25	18	21	23	25	2	3	0	54	24	0	76	54	22			0	1	0	26	40	5
Plattalva	Glacier	Switz.	46.83N; 8.98E	0.7	-0.154902	AAR						9	92	100	24	100	42	36	6.2	61.9	84			23	13
Praviy Aktru	Glacier	Russia	50.08N; 87.73E	4.76	0.677607	AAR										53	36	39	65	62	57	47	53	62	61	45
Rabots Glaciar	Glacier	Sweden	67.90N; 18.55E	3.9	0.591065	AAR												55.6	51.7	29.9	3.2	45	59	11	74	47	48	71	57	57	57	30	30	42	33	40	12	14	1			19		43	36	13
Rainbow	Glacier	US	48.80N; 121.77W	1.6	0.20412	AAR																70	62	75	59	56					60	68	75	45	90	70	42	68	50	45	38	46	76	80	36	80
Ram River	Glacier	Canada	51.85N; 116.48W	1.8	0.255273	AAR	4	48	57	60	6
Rhone	Glacier	Switz.	46.62N; 8.4E	17.4	1.24055	AAR										64	53	45	48
Riukojietna	Ice cap	Sweden	68.08N; 18.08E	4.7	0.672098	AAR																2	12	0	100	82	60	82	87	26	85	59	0	5	5	37		0	0			0	0	0	2	0
Sandalee	Glacier	US	48.42N; 120.80W	0.2	-0.69897	AAR																									85	85	80	2	100	100	0	9	0	0	0	4	6	40	0	66
Sary-Tor	Glacier	Kirgizstan	41.50N; 78.11E	4.6	0.662758	AAR															42	38	56	27	37
Sentinel	Glacier	Canada	49.9N; 122.98W	1.7	0.230449	AAR	72	70	91	100	74	90	23	64	1	60	62.8	69.5	86.4	82.5	22.1
Sforzellina	Glacier	Italy	46.35N; 10.51E	0.4	-0.39794	AAR																	0	0	26	0	0	26	30	28	14	10	23	8	18	10
Shaune Garang	Glacier	India	31.28N; 78.33E	4.9	0.690196	AAR												32	47	67.5	57	62	22	46	61.5	46
Sholes	Glacier	US	48.80N; 121.78W	0.7	-0.154902	AAR																									60	65	70	30	95	60	26	65	35	25	15	45	72	75	15	84
Shumskiy	Glacier	Russia	45.08N; 80.23E	2.8	0.447158	AAR															50	37	40	45	56	37	24
Silver	Glacier	US	48.98N; 121.95W	0.5	-0.30103	AAR																							71	34	54	73	60	56	20	69	67	54	37	14	8	6	8	40	13	88
Silvretta	Glacier	Switz.	46.85N; 10.08E	2.8	0.447158	AAR	9	36	6	95	82	49	75	94	46	93	77	10	37	83	68	34	2	32	31	19	6	11	43	33	46	46	43	0	45	63	71	57	0	53	26	2	21	31	6	44
Sonnblickkees	Glacier	Austria	47.13N; 12.60E	1.3	0.113943	AAR	42	64	23	88	83	73	71	92	78	93	82	10	32.6	79	46	7.9	33.4	25.5	75.2	32	22	3	44	9	70	48	78	5	28	60	40	35	1	62	44	29	2	23	48	23
South Cascade	Glacier	US	48.37N; 121.05W	1.7	0.230449	AAR	70	86	15	78	65	78	0	61	1	0						48	8	24	48	44	80	8	17	11	25	40	70	0	84	1	0	84	7	5	5	10	60	32	0
Spoerteggbreen	Glacier	Norway	61.61N; 7.47E	27.9	1.4456	AAR																		0	73	75	62
Storbreen	Glacier	Norway	61.52N; 8.13E	5.4	0.732394	AAR	68	49	65	77	52	56	25	35	66	5	59	45	72	47	42	51	87	6	90	92	57	68	80	39	35	19	23	77	42	76	24	0	2	22	43	0	30	51	53	4
Storglaciaren	Glacier	Sweden	67.90N; 18.57E	3.2	0.50515	AAR	41	27.8	40.5	43	63	48	51	45	39	20	39	52	54	45	33	52	55	27	66	60	47	58	58	41	57	42	41	36	42	53	30	37	29	40	43	17	50	53	37	28
Storglombreen	Glacier	Norway	66.67N; 14.0E	62.4	1.79518	AAR															62	75	5	5												86	0	0	0	78	79
Storsteinsfjellbreen	Glacier	Norway	68.22N; 17.92E	5.9	0.770852	AAR																					43	86	88	57	74
Superguksoak	Glacier	Canada	58.95N; 63.78W	1.4	0.146128	AAR												46	61	20
Suyok Zapadniy	Glacier	Russia	41.78N; 77.78E	1.25	0.09691	AAR	25													13					23	22	22
Svartisheibreen	Glacier	Norway	66.55N; 13.77E	5.48	0.738781	AAR																		22	80	73	70	81	81	65	76
Tarfalaglaciaren	Glacier	Sweden	67.93N; 18.65E	1	0	AAR																65	100	0	100	54	63	100												23	0.7	0	73	30		0
Trollbergdalsbreen	Glacier	Norway	66.72N; 14.45E	1.8	0.255273	AAR	29	21	100	21	40															35	38	100	50	5
Ts. Tuyuksuyskiy	Glacier	Russia	43.05N; 77.08E	2.5	0.39794	AAR	38	59	38	35	34	37	32	6	25	39	58	37.7	23.5	10	42	34	40	35	37	28	22	38	80	44	31	34	0	45	45	51	38	35	52	42	48	22	34	22	66	55
Tungnaarjokull	Ice cap	Iceland	64.62N; 18.07W	360	2.5563	AAR																62						67	65	60				18	51	40	44	35	45	40	38	41	40	37	48	0
Urumqihe S. No. 1	Glacier	China	43.08N; 86.82E	1.67	0.222716	AAR	57	67	31	43	68	46	65	28	33	48	29	48	57	58	30	27	49	36	66	71	31	68	69	40	51	67.5	24.5	34.5	32.5	51	39.5	36.5	48.5	41	51	31	32	17	64	0
Vermuntglacier	Glacier	Austria	46.85N; 10.13E	2.2	0.342423	AAR																					3	0	20	4	41	13	18	3	20
Vernagtferner	Glacier	Austria	46.88N; 10.82E	8.2	0.913814	AAR	39	79	43	81	80	74	88	84	73	77	72.2	24	25	71	61.1	18	54.6	39.3	49.7	31.8	8	22	37	22	39	40	41	30	56	48	47	53	0	34	40	25	19	17	14	23
Waldemarbreen	Glacier	Norway (Spitsbergen)	78.67N; 12.00E	2.6	0.414973	AAR																										48	42	0	7	21	1	20	14	21	15	16	13	31	16
Watson	Glacier	US	48.65N; 121.57W	0.2	-0.69897	AAR																		80	50	60
White	Glacier	Canada	79.45N; 90.67W	39.4	1.5955	AAR	59	86	82	69	81	80	59	67	65				71	69	76	62	9	91	90	16	50	16	12	28	46	82	65	65	40	36	51	80	58	75	33	61	25	21	29	58
Wolverine	Glacier	US (Alaska)	60.40N; 148.92W	16.7	1.22272	AAR	71	39	72	42	69	53	78	70	48	90	87	64	67	64	72	65	82	85	42	32	62	65	66	62	64	46	39	73	60	71	73	62	64	37	46	62	62	78	46
Woolsey	Glacier	Canada	51.12N; 118.62W	3.9	0.591065	AAR	54	60		70
Wurtenkees	Glacier	Austria	47.04N; 13.01E	0.8	-0.09691	AAR													7	57	8	1	14	11	28	21	16	7	15	5	32	11	45	8	13	30	33	4	3	28	16	17	4	15	33	20
Xiaodongkemadi	Glacier	China	33.17N; 92.13E	1.77	0.247973	AAR																			95	78	42	90	80
Yawning	Glacier	US	48.45N; 121.03W	0.3	-0.522879	AAR																									65	74	76	20	90	65	20	77	10	20	15	54	70	70	30	70
Yuri	Glacier	Canada	56.97N; 130.68W	3.58	0.553883	AAR								59	36	23	43	10.1	15.6	61.2					0
Zavisha	Glacier	Canada	50.8N; 123.42W	6.5	0.812913	AAR						98	29	72	2	14	30	17	83	75	0
Zongo	Glacier	Bolivia	16.25S; 68.17W	1.9	0.278754	AAR																						39	88	64	44	47	89	39	59	66	75	64	76	48	37	71	64	77	55	64
Number of observations							42	42	40	41	41	42	42	45	47	48	45	50	52	53	47	54	57	63	71	70	61	63	68	67	78	81	79	83	80	80	81	82	87	89	91	93	90	86	87	71
Mean							46.9524	57.6381	52.7625	58.6341	61.9756	56.8571	49.4524	56.3941	40.5066	51.038	50.76	42.34	53.4096	53.6291	44.3809	45.9704	53.1053	39.8331	54.6254	47.7171	40.6721	51.6508	53.7647	44.1904	51.0256	46.9938	49.3101	28.6807	52.9813	50.9625	36.1296	39.2256	22.546	32.9888	33.9747	26.7312	39.1778	45.1279	32.8621	32.7183
Mean, 10-yr running average												53.2211	53.6019	52.072	52.1368	51.6362	49.8768	48.7881	49.1534	47.4973	48.9092	48.5771	47.5683	48.4994	48.5349	47.591	48.2555	48.3578	47.9783	46.8631	46.6987	47.0232	46.569	45.3264	42.2046	41.0844	39.3793	37.353	36.3398	37.9845	35.9726	34.1482
Std deviation							23.3488	21.9187	28.9602	28.7104	25.6022	29.3919	28.4315	25.6786	23.4441	29.3454	21.421	20.7812	22.7554	24.747	24.126	21.2607	27.8421	27.424	24.5131	23.7692	24.5314	29.0634	28.6742	25.0514	22.8109	23.3793	26.1739	25.0287	28.546	26.9328	26.5113	25.7248	23.156	24.3317	26.2369	23.3276	27.0237	25.8169	23.1944	28.1822
Std error							3.6028	3.38212	4.57901	4.48381	3.9984	4.53526	4.38708	3.82793	3.41967	4.23565	3.19325	2.93891	3.15561	3.39927	3.51914	2.89321	3.68777	3.4551	2.90917	2.84096	3.14093	3.66165	3.47726	3.06052	2.58283	2.5977	2.94479	2.74726	3.19154	3.01118	2.9457	2.84083	2.48259	2.57916	2.75038	2.41896	2.84855	2.78391	2.4867	3.34461
Name	Glacier/ice cap	Country	Location	Area (km2)	Log Area (km2)	Data to right	1971	1972	1973	1974	1975	1976	1977	1978	1979	1980	1981	1982	1983	1984	1985	1986	1987	1988	1989	1990	1991	1992	1993	1994	1995	1996	1997	1998	1999	2000	2001	2002	2003	2004	2005	2006	2007	2008	2009	2010
n=144
Aalfotbreen	Ice cap outlet	Norway	61.75N; 5.65E	4.5	0.653213	Mass balance (kg m-2 yr-1)	940	-110	2180	1030	1210	1530	-560	-510	-130	-610	220	-130	1600	1320	-560	-410	2070	-2480	2930	1790	790	2290	2180	780	1200	-1880	80	110	60	1990	-2093	-1530	-2502	-100	668	-3190	1270	680	-170	-1840
Abramov	Glacier	Kirgizstan	39.63N; 71.6E	25.9	1.4133	Mass balance (kg m-2 yr-1)	-790	330	-820	-580	-2580	-900	-1450	-1310	-390	-1080	60	-840	-510	-1680	-860	-1010	240	-10	-220	-540	-430	400	300	-750	-780	-354	-1737	204
Alexander	Glacier	Canada	57.1N; 130.82W	5.8	0.763428	Mass balance (kg m-2 yr-1)									-500	-520	-180	-1180	-1400	100					-970	-1070
Andrei	Glacier	Canada	56.93N; 130.97W	92	1.96379	Mass balance (kg m-2 yr-1)								-830	-640	-180	70	-970	-790	140					-460	-420
Antizana15Alpha	Glacier	Equador	0.47S; 78.15W	0.3	-0.522879	Mass balance (kg m-2 yr-1)																									-1830	-342	-639	-912	510	378	-598	-1038	-1366	-604	-1216	-203	-904	337	-828	-938
Austdalsbreen	Ice cap	Norway	61.80N; 7.35E	11.8	1.07188	Mass balance (kg m-2 yr-1)																		-1280	1840	1200	0	540	910	-70	620	-1070	-530	190	-480	1110	-1620	-2010	-2340	-960	190	-2060	180	-70	-700	-2000
Austre Broggerbreen	Glacier	Norway (Spitsbergen)	78.88N; 11.83E	6.2	0.792392	Mass balance (kg m-2 yr-1)	-580	-310	-80	-920	-310	-450	-110	-560	-710	-520	-550	-40	-270	-730	-550	-320	220	-520	-450	-660	130	-100	-1030	-160	-780	-170	-710	-860	-360	-20	-480	-580	-900	-1120	-1000	-730	-460	-130	-246	-440
Baby	Glacier	Canada	79.43N; 90.97W	0.6	-0.221849	Mass balance (kg m-2 yr-1)	-476	321		132	319	149	-480													-313	-143	-71	-594	-153	-353	165	-126	-21	-925	-560	-100	293	-334		-370
Bahia Del Diablo	Glacier	Antarctica	63.82S; 57.43W	14.3	1.15534	Mass balance (kg m-2 yr-1)																														-560	-60	-510	-150	-110	-230	-580	-80	-530	-255	370
Basodino	Glacier	Switz.	46.42N; 8.48E	2.3	0.361728	Mass balance (kg m-2 yr-1)																						349	-82	444	614	166	-209	-1074	-443	-781	591	-356	-2043	-490	-1172	-2501	-902	-1168	130	-584
Bench	Glacier	Canada	51.43N; 124.92W	10.3	1.01284	Mass balance (kg m-2 yr-1)											-610	-930	-540	-190	-880			0	-1060	-1070
Blue	Glacier	US	47.82N; 123.68W	4.3	0.633468	Mass balance (kg m-2 yr-1)	1150	400	-140	2000	670	1420	-1240	510	-1150	-1610	-1310	750	1340	490	420	-920	-790	220	-640	-1180	-790	-1180	-1350	-1750	-10	-790	-490	-880	1090
Bondhusbreen	Glacier	Norway	60.03N; 6.33E	10.2	1.0086	Mass balance (kg m-2 yr-1)							1000	-510	330	-450
Breidalblikkbrea	Glacier	Norway	60.10N; 6.40E	3.6	0.556303	Mass balance (kg m-2 yr-1)																																	-2260	-940	-280	-2940	430	-300	-520	-1940
Breidamjok. E.B.	Ice cap	Iceland	64.22N; 16.33W	540	2.73239	Mass balance (kg m-2 yr-1)																												-1430		-1220	-1100	-863	-775	-1330	-1530
Brewster	Glacier	New Zealand	44.07S; 169.43E	2.5	0.39794	Mass balance (kg m-2 yr-1)																																			1141	282	297	-1653	-828
Bruarjokull	Ice cap	Iceland	64.67N; 16.17W	1600	3.20412	Mass balance (kg m-2 yr-1)																							1090	550	-342	-220		-670	-300	-1010	140	52	-568	-800	-1557	-790	-536	-503	-122	-1570
Calderone	Glacier	Italy	42.47N; 13.62E	0.1	-1	Mass balance (kg m-2 yr-1)																															-511	-1847	-264	252	-194	1090	-2320	275	401	702
Careser	Glacier	Italy	46.45N; 10.70E	2.1	0.322219	Mass balance (kg m-2 yr-1)	-650	400	-1280	-320	170	-270	990	80	-180	10	-840	-1680	-790	-590	-760	-1140	-1640	-1010	-820	-1580	-1730	-1200	-300	-1740	-1080	-1320	-930	-2240	-1800	-1610	-250	-1149	-3317	-1562	-2005	-2093	-2745	-1851	-1236	-962
Charquini Sur	Glacier	Bolivia	16.17S; 68.09W	0.3	-0.522879	Mass balance (kg m-2 yr-1)																																	-884	-1486	-2499	-376	-482	161	-1616	-2921
Chhota Shigri	Glacier	India	32.2N; 77.5E	15.7	1.1959	Mass balance (kg m-2 yr-1)																																	-1416	-1227	144	-1413
Ciardoney	Glacier	Italy	45.52N; 7.40E	0.8	-0.09691	Mass balance (kg m-2 yr-1)																						-970	-410	-1100	-560	-370	-660	-3360	-2430	-1230	160	-400	-3000	-1060	-2230	-2099	-1490	-1510	-490	-830
Columbia (2057)	Glacier	US	47.97N; 121.35W	0.9	-0.0457575	Mass balance (kg m-2 yr-1)														210	-310	-200	-630	140	-90	-60	380	-1850	-900	-960	-450	-620	350	-1460	1750	400	-1520	600	-1170	-1830	-3210	-980	-370	960	-900	-210
Daniels	Glacier	US	47.57N; 121.17W	0.4	-0.39794	Mass balance (kg m-2 yr-1)														110	-510	-360	-870	-150	-370	-680	-70	-1700	-830	-450	240	450	880	-1820	1520	-250	-1750	-180	-1520	-2130	-2900	1250	120	410	-1350	-260
Devon NW	Ice cap	Canada	75.42N; 83.25W	1667	3.22194	Mass balance (kg m-2 yr-1)	-69	102	-95	-77	-69	176	-99	27	39	-57	-146	-95	105	-31	-108	184	44	-216	-69	-166	-230	96	-62	-32	-147	-80	-13	-276	-217	-320	-559	-21	-139	46	-262	-242	-291	-394	-523	-417
Djankuat	Glacier	Russia	43.20N; 42.77E	3	0.477121	Mass balance (kg m-2 yr-1)	-230	-1140	-280	240	-910	290	-370	440	-310	380	-910	420	-970	210	-380	-500	1540	520	40	340	-310	-130	1100	-840	40	-150	270	-1000	-560	-1140	-620	430	280	730	390	-800	-2010	100	-120	-600
Dyngjujokull	Ice cap outlet	Iceland	64.67N; 17.0W	1050	3.02119	Mass balance (kg m-2 yr-1)																						1700	1270	190	20	-390	-1060	-490							-1327	-353	95	-24	227	-1540
Easton	Glacier	US	48.75N; 120.83W	2.9	0.462398	Mass balance (kg m-2 yr-1)																				-580	410	-1670	-1010	-920	-310	220	530	-1870	1610	-100	-1930	180	-980	-1060	-2450	790	260	450	-2060	680
Emmons	Glacier	US	46.85N; 121.72W	11.6	1.06446	Mass balance (kg m-2 yr-1)																																	-2822			-940	-430	-630	-1800
Engabreen	Ice cap	Norway	66.65N; 13.85E	39.6	1.5977	Mass balance (kg m-2 yr-1)	1010	-70	2720	800	1610	2410	880	-510	420	-500	980	840	1060	1050	-900	250	940	-1790	3170	850	690	2340	1040	420	1700	830	1220	210	-30	1490	-1530	-557	-584	817	897	-1430	1030	310	-30	-520
Eyjabakkajokull	Ice cap	Iceland	64.65N; 15.58W	110	2.04139	Mass balance (kg m-2 yr-1)																					-900	40	740	460	-420	-850	-2200	-1390	-1120	-2020	286	-1093	-1094	-1310	-2202	-1425	-636	-1282	-507	-1750
Filleck K.	Glacier	Austria	47.13N; 12.6E	0.15	-0.823909	Mass balance (kg m-2 yr-1)	-300	120	-860	690	560	280	230	870	130	860
Findelen	Glacier	Switz.	46.0N; 7.87E	15.3	1.18469	Mass balance (kg m-2 yr-1)																																			-200	-1200	-200	-300	100	-470
Fontana Bianca	Glacier	Italy	46.48N; 10.77E	0.5	-0.30103	Mass balance (kg m-2 yr-1)														395	-600	-107	-486	-1096				-1091	-556	-955	-682	-440	-620	-1620	-970	-740	395	-435	-2950	-994	-1471	-1753	-1607	-1246	-622
Foss	Glacier	US	47.55N; 121.20W	0.3	-0.522879	Mass balance (kg m-2 yr-1)														510	-690	120	-380	230	90	-270	300	-1920	-730	-680	310	340	500	-1950	1560	-100	-1920	100	-1350	-1940	-3120	-1020	-380	180	-2020	-110
Garabashi	Glacier	Russia	43.30N; 42.47E	4.5	0.653213	Mass balance (kg m-2 yr-1)														340	-100	-640	410	270	30	90	-30	140	310	-430	-10	-30	190	-1510	-820	-1060	-750	260	160	250	200	-656	-633	-423	-371	-1240
Goldbergkees	Glacier	Austria	47.03N; 12.47E	1.4	0.146128	Mass balance (kg m-2 yr-1)																															-388	-612	-1806	137	-260	-1077	-1106	-651	-542	-216
Golubin	Glacier	Kirgizstan	42.47N; 74.5E	5.7	0.755875	Mass balance (kg m-2 yr-1)	-90	-109	-391	-462	-236	-397	-322	-460	-289	-500	150	-210	-222	-485	-557	-372	152	-432	-422	-590	-573	-454	-276	-501
Graafjellsbrea	Glacier	Norway	60.10N; 6.40E	8.9	0.94939	Mass balance (kg m-2 yr-1)				580	250																												-2170	-820	10	-3040	780	-140	-540	-1840
Graasubreen	Glacier	Norway	61.65N; 8.60E	2.3	0.361728	Mass balance (kg m-2 yr-1)	-470	-640	-890	340	-950	-1000	-390	-220	40	-890	-190	-510	-50	-370	0	-760	720	-580	450	730	-520	-100	420	0	-110	-450	-1690	110	-390	-50	24	-1415	-1394	-492	-493	-2080	-710	80	-280	-1060
Gries	Glacier	Switz.	46.44N; 8.34E	5	0.69897	Mass balance (kg m-2 yr-1)	-527	408	-1095	-178	378	-1021	1166	1056	-855	570	-324	-1304	-779	-4	-526	-947	-733	-924	-1071	-1988	-1344	-1125	-1052	-209	-278	-517	-1068	-2053	-564	-985	-229	-990	-2711	-1146	-1512	-1995	-1473	-1601	-883	-1307
Gulkana	Glacier	US (Alaska)	63.25N; 145.42W	15.5	1.19033	Mass balance (kg m-2 yr-1)	-55	-178	542	-1298	-179	-664	-308	-237	-559	378	50	-309	-66	-352	353	54	-102	-116	-607	-551	-89	-227	-1794	-523	-806	-427	-1823	-499	-1189	49	-612	-1016	-283	-2625	-705	-286	-1393	-118	-654	-1832
Hamtah	Glacier	India	32.24N; 77.37E	3.4	0.531479	Mass balance (kg m-2 yr-1)																															-1654	-1221	-1621	-1857	-1856	-1391
Hansbreen	Ice cap	Norway (Spitsbergen)	77.08N; 15.67E	56.7	1.75358	Mass balance (kg m-2 yr-1)																			-530	-900	-280	-31	-243	222	-418			-600	-350	-480	-1100	-606	-569	-577	47	93	-4	149	-844	-14
Hansebreen	Glacier	Norway	61.75N; 5.68E	3.1	0.491362	Mass balance (kg m-2 yr-1)																-580	1130	-2740	420	320	915	974	1082	426	481	-2020	-150	-300	110	870	-2720	-1930	-2670	-500	-90	-3980	840	260	-970	-2220
Hardangerjokulen	Ice cap	Norway	60.53N; 7.37E	17.1	1.233	Mass balance (kg m-2 yr-1)	740	-80	830	410	150	150	-720	-300	300	-1400	850	-700	1700	-100	-520	-100	940	-1150	2110	1930	-90	1990	1910	160	300	-1070	-530	690	50	1430	-845	-708	-1364	80	723	-2220	1170	450	150	-1490
Hellstugubreen	Glacier	Norway	61.57N; 8.43E	3	0.477121	Mass balance (kg m-2 yr-1)	-130	-490	-210	240	-360	-730	-720	-540	-20	-1240	-330	-350	170	-510	-290	-490	450	-1040	720	660	-450	140	300	70	-120	-740	-1650	-20	-420	190	-364	-1415	-1528	-843	-287	-2010	-670	-60	-230	-1340
Helm	Glacier	Canada	49.97N; 123.00W	0.8	-0.09691	Mass balance (kg m-2 yr-1)					-357	568	-1464	-783	-2731	-944		-340	-209	-320	-1728	-1334	-788	-150	-1670	-1790	-2239	-2798	-2342	-1885	-1465	211	-1073	-2850	1500	110	-600	-2544	-1895	-1995	-2765	-2750	-210	-2300	-510
Hidden	Glacier	Canada	58.93N; 63.55W	0.85	-0.0705811	Mass balance (kg m-2 yr-1)												-238	-213	-816
Hintereisferner	Glacier	Austria	46.80N; 10.77E	7.1	0.851258	Mass balance (kg m-2 yr-1)	-600	-74	-1229	55	65	-314	760	411	-219	-50	-173	-1240	-580	32	-574	-732	-717	-945	-637	-995	-1325	-1120	-570	-1110	-460	-827	-591	-1232	-861	-633	-173	-647	-1814	-667	-1061	-1516	-1797	-1235	-1182	-1419
Hoegtuvbreen	Glacier	Norway	66.45N; 13.65E	2.6	0.414973	Mass balance (kg m-2 yr-1)	-742	-963	1088	-207	722	910	-520
Hofsjokull E (Thjorsarjokull)	Ice cap outlet	Iceland	64.80N; 18.58W	235.9	2.37273	Mass balance (kg m-2 yr-1)																			1000	110	-990	1610	1110	-180	-800	-1170	-1150	-1180	-510	-970	-1550	-730	-1310	-1630	-20	-490	-870	-790	-170	-2830
Hofsjokull N (Satujokull)	Ice cap outlet	Iceland	64.95N; 18.92W	81.5	1.91116	Mass balance (kg m-2 yr-1)																		-740	580	-600	-1410	1060	910	80	-680	-780	-1050	-680	-250	-1340	-580	-1000	-980	-1360	-430	-510	-870	-570	-350	-2400
Hofsjokull SW (Blagnipujokull)	Ice cap	Iceland	64.72N; 19.05W	51.5	1.71181	Mass balance (kg m-2 yr-1)																			450	-680	-1490	1190	130	-740	-1170	-1230	-1420	-1590	-1090	-1750	-1890	-640	-1170	-1500	-580	-610	-860	-930	-350	-3490
Hurd	Glacier	Antarctica	62.68S; 60.40W	4.7	0.672098	Mass balance (kg m-2 yr-1)																																-140	-520	10	-120	-860	-540	190	-390	290
Ice Worm	Glacier	US	47.55N; 121.17W	0.1	-1	Mass balance (kg m-2 yr-1)														860	-750	-450	-1390	-240	-670	-920	630	-2230	-1020	-1230	470	570	760	-1640	2150	-330	-2150	50	-1400	-2000	-2850	-1350	-620	-100	-1560	-380
IGAN	Glacier	Russia	67.61N; 66.03E	0.8	-0.09691	Mass balance (kg m-2 yr-1)	-140	380	320	-930	920	-1780	-1620	-370	1020	-1110
Irenebreen	Glacier	Norway (Spitsbergen)	78.65N; 12.10E	4.1	0.612784	Mass balance (kg m-2 yr-1)																																-613	-630	-605	-862	-822	-695	-357	-630
Ivory	Glacier	New Zealand	43.13S; 170.92E	0.9	-0.0457575	Mass balance (kg m-2 yr-1)	-1320	-1660	-1730	-3480	-4000
Jamtalferner	Glacier	Austria	46.87N; 10.17E	3.3	0.518514	Mass balance (kg m-2 yr-1)																			-439	-426	-1439	-1230	-370	-830	-150	-550	-217	-1319	-257	-80	-62	-671	-2229	-228	-975	-1293	-1438	-981	-953	-1434
Johnsons	Glacier	Antarctica	62.66S; 60.35W	5.6	0.748188	Mass balance (kg m-2 yr-1)																																20	-160	80	220	-330	290	90	-170	510
Jostefonn	Glacier	Norway	60.53N; 7.37E	3.8	0.579784	Mass balance (kg m-2 yr-1)																										-1620	-420	300	380	1020
Karsojietna	Glacier	Sweden	68.35N; 18.32E	1.2	0.0791812	Mass balance (kg m-2 yr-1)												330	340							350	70	870	970
Kesselwandferner	Glacier	Austria	46.83N; 10.79E	3.8	0.579784	Mass balance (kg m-2 yr-1)	46	368	-380	573	369	-37	701	423	66	162	161	-620	-182	178	-8	-494	-243	-265	-151	-242	-849	-410	120	-830	140	-111	11	-604	-12	140	525	17	-1546	-188	-59	-617	-837	-444	-795	-670
Kleinfleisskees	Glacier	Austria	47.05N; 12.95E	0.9	-0.0457575	Mass balance (kg m-2 yr-1)																															-195	-808	-1442	125	-111	-655	-946	-623	-403	-758
Koeldukvislarj kull	Ice cap	Iceland	64.58N; 17.83W	310	2.49136	Mass balance (kg m-2 yr-1)																						980		-30	-590	-630	-1170	-980	-540	-730	-818	-227	-1075	-776	-627	-402	-342	-587	-134	-2870
Kongsvegen	Ice cap	Norway (Spitsbergen)	78.80N; 12.98E	101.9	2.00817	Mass balance (kg m-2 yr-1)																	540	-50	-150	-300	430	320	-380	500	-350	390	100	-710	-150	330	-480	-220	-350	-740	-440	20	-90	418	-78	130
Koryto	Glacier	Russia	54.68N; 161.0E	7.5	0.875061	Mass balance (kg m-2 yr-1)												-284														1140	2340	-2120	660	-440
Kozelskiy	Glacier	Russia	53.23N; 158.82E	1.8	0.255273	Mass balance (kg m-2 yr-1)			580	1640	-50	1330	-880	-940	-200	0	-1950	60	-250	-340	2020	-1660	-300	-1940	-740	-1280	460	-410	-350	-670	-230	600	940
La Conejera	Glacier	Colombia	4.48N; 75.22W	0.2	-0.69897	Mass balance (kg m-2 yr-1)																																				-1936	-995	1557	-2484	-3075
Langfjordjokelen	Glacier	Norway	70.12N; 21.77E	3.7	0.568202	Mass balance (kg m-2 yr-1)																			-560	-320	0	190	200	-725	245	20	-690	-1440	-1580	-610	-2280	-1540	-1070	-1920	-1250	-2410	-810	-350	-1320	-760
Langjokull S. Dome	Ice cap	Iceland	64.62N; 18.07W	900	2.95424	Mass balance (kg m-2 yr-1)																											-1300	-1700	-770	-750	-1271	-1656	-1946	-1487	-894	-1080	-1412	-1842	-362	-3800
Lemon Creek	Glacier	US (Alaska)	58.38N; 134.40W	11.6	1.06446	Mass balance (kg m-2 yr-1)	-400	-650	-520	-370	290	-250	-480	-900	-630	-270	-810	-430	-1620	-250	330	-510	-840	110	-1240	-1110	-380	-660	-980	-760	-1310	-1580	-1810	-1460	200	650	400	-250	-1900	-650	-470	-170	150	800	-700	-580
Leviy Aktru	Glacier	Russia	50.08N; 87.72E	6	0.778151	Mass balance (kg m-2 yr-1)							240	-370	-680	-20	-320	-410	280	320	150	60	200	370	30	50	-480	-190	240	-360	-30	-170	-150	-1120	-140	-290	-240	-370	-400	-260	40	-190	-320	-810	470
Limmern	Glacier	Switz.	46.82N; 8.98E	2.5	0.39794	Mass balance (kg m-2 yr-1)	-1332	-225	-1043	39	540	-998	788	856	-36	721	-111	-649	-803	-333	250	-360	190	-220	-308
Lower Curtis	Glacier	US	48.83N; 121.62W	0.8	-0.09691	Mass balance (kg m-2 yr-1)														390	-160	-220	-560	-60	-290	-510	40	-1760	-480	-550	-210	-180	270	-1380	1550	-250	-1880	130	-1250	-1510	-2750	-1060	-400	120	-2150	-440
Lynch	Glacier	US	47.57N; 121.18W	0.6	-0.221849	Mass balance (kg m-2 yr-1)														330	-220	-70	-300	170	30	-120	360	-1380	-620	-400	180	530	620	-1970	1450	-240	-1820	-130	-1200	-1980	-2620	-1050	70	510	-1820	-340
Maarmaglaciaren	Glacier	Sweden	68.05N; 18.41E	4	0.60206	Mass balance (kg m-2 yr-1)																				-120	-200	90	270	-340	100	-380	-200	-280	-300	130	-410	-660	-1420	-580	-790	-1650	-530	120	-1390	-500
Maladeta	Glacier	Spain	42.65N; 0.64E	0.3	-0.522879	Mass balance (kg m-2 yr-1)																						-327	-32	351	-643	207	512	-955	-764	-900	502	-811	-1102	-1516	-1479	-1787	-947	-38	-1415	259
Malavalle	Glacier	Italy	46.95N; 11.12E	6.2	0.792392	Mass balance (kg m-2 yr-1)																																-909	-1461	-208	-800	-1322	-1358	-900	-517	-197
Maliy Aktru	Glacier	Russia	50.08N; 87.75E	2.7	0.431364	Mass balance (kg m-2 yr-1)	250	70	100	-1470	400	680	490	-410	-580	110	-310	-660	150	310	240	40	170	470	220	130	-540	-170	340	-150	160	-130	-50	-1230	-110	-210	-190	-410	-370	-150	160	-140	-300	-870	590
Martial Este	Glacier	Argentina	54.78S; 68.40W	0.1	-1	Mass balance (kg m-2 yr-1)																															785	-682	-202	-1318	-991	-513	99	-56	-119	930
Marukh	Glacier	Russia	43.36N; 41.42E	0.18	-0.744727	Mass balance (kg m-2 yr-1)	-900	-1190	-120	-370	-1260	340	-820	190	-160	-1470	-360	-180
McCall	Glacier	US (Alaska)	69.28N; 143.83W	7.6	0.880814	Mass balance (kg m-2 yr-1)	-120	-140																					-480	-740	-550	30	-450	-860	-560	-310
Midtre Lovenbreen	Glacier	Norway (Spitsbergen)	78.88N; 12.07E	5.5	0.740363	Mass balance (kg m-2 yr-1)	-460	-220	-20	-890	-210	-350	-40	-480	-660	-430	-460	20	-170	-680	-480	-210	240	-490	-240	-510	100	-140	-880	-120	-790	20	-430	-590	-340	-30	-330	-520	-790	-970	-740	-480	-250	-9	-138	-200
Minaret	Glacier	Canada	58.88N; 63.68W	0.9	-0.0457575	Mass balance (kg m-2 yr-1)												56	285	-156
Mittivakkat	Glacier	Greenland	65.67N; 37.83W	17.6	1.24551	Mass balance (kg m-2 yr-1)																										10	-400	-1170	-770	-830	-960	-500	340	-1070	-1820	-580	-1580	-520	-1010	-2160
Mutnovskiy NE	Glacier	Russia	52.46N; 158.22E	1.4	0.146128	Mass balance (kg m-2 yr-1)										28	-470	680	-160	550
Mutnovskiy SW	Glacier	Russia	52.45N; 158.19E	1.1	0.0413927	Mass balance (kg m-2 yr-1)										29	-480	1150	-140	230
Nigardsbreen	Ice cap	Norway	61.72N; 7.13E	47.8	1.67943	Mass balance (kg m-2 yr-1)	820	-140	1100	480	270	400	-770	-130	710	-1220	310	-420	1090	340	-220	-100	1480	-890	3470	1770	200	1600	1850	560	1190	-410	470	970	170	1720	-219	-888	-1159	-43	1098	-1399	1047	1100	240	-800
No. 125 (Vodopadniy)	Glacier	Russia	50.10N; 87.70E	0.8	-0.09691	Mass balance (kg m-2 yr-1)							80	-190	-780	-120	-10	-310	160	290	210	120	180	160	100	140	-420	-20	100	-210	50	-120	-170	-980	-90	-190	-140	-290	-320	-220	60	-260	-270	-720	380
No. 104	Glacier	Russia	79.37N; 95.65E	1817	3.25935	Mass balance (kg m-2 yr-1)						220	190	-240								80	-70	420
No. 356	Glacier	Russia	41.83N; 78.18E	3.6	0.556303	Mass balance (kg m-2 yr-1)															-134	-143	220	-453	-167
Noisy Creek	Glacier	US	48.67N; 121.53W	0.5	-0.30103	Mass balance (kg m-2 yr-1)																							-953	-1163	-108	224	1060	-1135	1218	472	-1326	462	-952	-1575	-2410	-320	-360	-290	-1190	-180
North Klawatti	Glacier	US	48.57N; 121.12W	1.5	0.176091	Mass balance (kg m-2 yr-1)																							-1069	-1929	-470	343	1425	-1233	1257	868	-1767	224	-1367	-1272	-2060	-1140	-740	-220	-1830	250
Obrucheva	Glacier	Russia	67.63N; 65.8E	0.3	-0.522879	Mass balance (kg m-2 yr-1)	-210	850	180	-680	170	-890	-1500	1560	-10	1070	-940
Ochsentaler	Glacier	Switz.	46.85N; 10.1E	2.6	0.414973	Mass balance (kg m-2 yr-1)																					-705	-1120	-190	-980	50	-270	60	-936	-30
Pendente	Glacier	Italy	46.96N; 11.23E	0.9	-0.0457575	Mass balance (kg m-2 yr-1)																										-534	-12	-1182	-541	-1363	49	-1323	-2122	-429	-1372	-1687	-2154	-1484	-844	-134
Peyto	Glacier	Canada	51.67N; 116.53W	11.5	1.0607	Mass balance (kg m-2 yr-1)	-410	-250	430	240	-570	640	-210	-1050	-810	-580	-1130	-560	-390	-580	-810	-470	-620	-990	-590	-740	-1215		-1215	1295	-300	129	-818	-2210	-320	810	-920	-500	-1370	-550	-810	-1650	-1850	-230	-1020
Place	Glacier	Canada	50.43N; 122.60W	3.2	0.50515	Mass balance (kg m-2 yr-1)	-343	-344	-299	562	-238	877	-1227	-433	-2212	-923	-1093	-754	-441	-337	-1882	-1312	-845	-969	-1040	-938	-990	-790	-2280	-2010	-2486	-221	-888	-2450	620	130	-760	-123	-995	-2210	-1295	-1900	-150	-490	-1500
Plattalva	Glacier	Switz.	46.83N; 8.98E	0.7	-0.154902	Mass balance (kg m-2 yr-1)	-1406	-363	-985	189	659	-849	544	1276	-159	980	-181	-246	-549	74	400	-750	260	-310	-780
Praviy Aktru	Glacier	Russia	50.08N; 87.73E	4.76	0.677607	Mass balance (kg m-2 yr-1)										250	-330	-310	330	330	290	150	230	310	190	70
Rabots Glaciar	Glacier	Sweden	67.90N; 18.55E	3.9	0.591065	Mass balance (kg m-2 yr-1)												-70	-110	-510	-1280	-188	223	-1052	618	-40	-216	110	510	-100	80	-470	-140	-470	-400	-230	-760	-879	-1440		-1170	-1630		350	-500	-1080
Rainbow	Glacier	US	48.80N; 121.77W	1.6	0.20412	Mass balance (kg m-2 yr-1)														580	40	200	-260	430	-240	-460	440	-1650	-800	-720	-200	120	510	-1490	1840	150	-1710	120	-980	-1670	-2650	-610	290	650	-1980	760
Ram River	Glacier	Canada	51.85N; 116.48W	1.8	0.255273	Mass balance (kg m-2 yr-1)	-940	-130	-40	60	-620
Rhone	Glacier	Switz.	46.62N; 8.4E	17.4	1.24055	Mass balance (kg m-2 yr-1)										889	87	-375	-160
Riukojietna	Ice cap	Sweden	68.08N; 18.08E	4.7	0.672098	Mass balance (kg m-2 yr-1)																-540	-260	-910	890	210	80	586	350	-295	253	-60	-980	-840	-801	-312	-1730	-1830	-1780		-350	-1400	-960	-590	-720	-960
Sandalee	Glacier	US	48.42N; 120.80W	0.2	-0.69897	Mass balance (kg m-2 yr-1)																								-190	365	826	1030	-901	1481	860	-898	752	-1155	-1232	-2293	-400	-60	-140	-650	240
Sary-Tor	Glacier	Kirgizstan	41.50N; 78.11E	4.6	0.662758	Mass balance (kg m-2 yr-1)														-88	-145	-142	270	-453	-880
Sentinel	Glacier	Canada	49.9N; 122.98W	1.7	0.230449	Mass balance (kg m-2 yr-1)	570	240	780	2110	880	1470	-1329	363	-1740	272	170	860	1200	850	-840	-372	98	367	-882
Sforzellina	Glacier	Italy	46.35N; 10.51E	0.4	-0.39794	Mass balance (kg m-2 yr-1)																	-920	-970	-570	-1160	-1210	-770	-286	-712	-728	-816	-814	-1682	-1209	-1440
Shaune Garang	Glacier	India	31.28N; 78.33E	4.9	0.690196	Mass balance (kg m-2 yr-1)												-570	-500	460	-100	30	-790	-630	340	-270
Sholes	Glacier	US	48.80N; 121.78W	0.7	-0.154902	Mass balance (kg m-2 yr-1)																				-320	480	-1880	-960	-880	-250	60	420	-1560	1760	-80	-1830	210	-1120	-1860	-2840	-710	290	200	-2680	940
Shumskiy	Glacier	Russia	45.08N; 80.23E	2.8	0.447158	Mass balance (kg m-2 yr-1)	-720	60	-840	-1125	-620	-390	-1200	-1490	-870	-1070	-260	-790	-1050	-1000	-338	-438	-581	29	274	-581	-1101
Silver	Glacier	US	48.98N; 121.95W	0.5	-0.30103	Mass balance (kg m-2 yr-1)																							-57	-185	436	572	1220	-811	740	521	-1227	-147	-1421	-563	-1490	-1010	-650	260	-1990	550
Silvretta	Glacier	Switz.	46.85N; 10.08E	2.8	0.447158	Mass balance (kg m-2 yr-1)	-758	-259	-1102	763	322	-218	422	887	-149	735	479	-697	-487	717	207	-367	-944	-413	-393	-709	-1238	-1144	-244	-708	-129	-143	-263	-1591	-196	12	673	-298	-2529	-120	-1050	-1449	-916	-639	-1097	-268
Sonnblickkees	Glacier	Austria	47.13N; 12.60E	1.3	0.113943	Mass balance (kg m-2 yr-1)	-392	128	-721	576	397	79	148	833	224	834	414	-1282	-535	338	-281	-1432	-525	-711	252	-561	-818	-2098	-315	-1385	141	-245	314	-1696	-647	-33	-399	-485	-2870	8	-323	-621	-2175	-777	-254	-792
South Cascade	Glacier	US	48.37N; 121.05W	1.7	0.230449	Mass balance (kg m-2 yr-1)	600	1430	-1040	1020	-50	950	-1300	-380	-1560	-1020	-840	80	-770	120	-1200	-710	-2560	-1640	-710	-730	-200	-2010	-1230	-1020	-690	100	630	-1860	1020	380	-1570	550	-2100	-1650	-2450	-1450	-210	-290	-1860	-810
Spoerteggbreen	Glacier	Norway	61.61N; 7.47E	27.9	1.4456	Mass balance (kg m-2 yr-1)																		1000	1140	1020	30
Storbreen	Glacier	Norway	61.52N; 8.13E	5.4	0.732394	Mass balance (kg m-2 yr-1)	180	-310	80	240	-150	-90	-540	-440	-100	-1310	-100	-470	200	-300	-400	-320	320	-950	1200	1250	-150	150	690	-250	-150	-1030	-1030	220	-240	550	-570	-1786	-1566	-585	-63	-2150	-390	110	-220	-1760
Storglaciaren	Glacier	Sweden	67.90N; 18.57E	3.2	0.50515	Mass balance (kg m-2 yr-1)	-190	-1050	50	-340	1170	270	200	-80	-210	-1270	-190	260	280	120	-720	-60	480	-840	1240	590	170	880	1000	-370	700	-390	-630	-520	-180	580	-700	-830	-1040	-120	-70	-1720	410	580	-530	-690
Storglombreen	Glacier	Norway	66.67N; 14.0E	62.4	1.79518	Mass balance (kg m-2 yr-1)															-410	450	-1690	-1690												1110	-1760	-1250	-1100	110	330
Storsteinsfjellbreen	Glacier	Norway	68.22N; 17.92E	5.9	0.770852	Mass balance (kg m-2 yr-1)																					-40	1040	950	-210	570
Superguksoak	Glacier	Canada	58.95N; 63.78W	1.4	0.146128	Mass balance (kg m-2 yr-1)												-56	211	-606
Suyok Zapadniy	Glacier	Russia	41.78N; 77.78E	1.25	0.09691	Mass balance (kg m-2 yr-1)	-461													-1348					-499	-676	-527
Svartisheibreen	Glacier	Norway	66.55N; 13.77E	5.48	0.738781	Mass balance (kg m-2 yr-1)																		-1610	2360	820	170	1210	910	-20	800	400	700	5	-600	700
Tarfalaglaciaren	Glacier	Sweden	67.93N; 18.65E	1	0	Mass balance (kg m-2 yr-1)																0	900	-1290	1230	50	160	1360								1190	-370			-380	-920	-2530	210	-200	-1710	-1060
Trollbergdalsbreen	Glacier	Norway	66.72N; 14.45E	1.8	0.255273	Mass balance (kg m-2 yr-1)	-330	-1240	760	-400	-280															-120	0	600	210	-1100
Ts. Tuyuksuyskiy	Glacier	Russia	43.05N; 77.08E	2.5	0.39794	Mass balance (kg m-2 yr-1)	-330	130	-300	-620	-450	-720	-1100	-1480	-520	-630	110	-630	-540	-1250	-550	-520	-340	-610	-460	-960	-1100	-240	602	-443	-587	-456	-1467	-359	-230	-113	-555	-302	359	62	-340	-969	-915	-1357	206	30
Tungnaarjokull	Ice cap	Iceland	64.62N; 18.07W	360	2.5563	Mass balance (kg m-2 yr-1)																30						240	130	-140			-1880	-1480	-1020	-1280	-1629	-1276	-1220	-1699	-1757	-1569	-997	-1340	-809	-3551
Urumqihe S. No. 1	Glacier	China	43.08N; 86.82E	1.67	0.222716	Mass balance (kg m-2 yr-1)	102	262	-707	-24	306	29	180	-110	-76	-335	-652	-45	100	-83	-612	-699	-176	-642	106	52	-706	23	-29	-378	-229	41.5	-884	-776	-781	-310.5	-1159	-1264	-622	-775	-491.5	-713	-619	-931	63	-1327
Vermuntgl.	Glacier	Austria	46.85N; 10.13E	2.2	0.342423	Mass balance (kg m-2 yr-1)																					-1490	-1350	-570	-1450	-240	-720	-500	-1544	-528
Vernagtferner	Glacier	Austria	46.88N; 10.82E	8.2	0.913814	Mass balance (kg m-2 yr-1)	-424	137	-460	230	171	50	352	288	44	140	55	-845	-537	20	-112	-808	-290	-497	-312	-568	-1079	-858	-472	-1028	-398	-413	-487	-1003	-108	-287	-224	-266	-2133	-407	-523	-882	-966	-843	-959	-680
Waldemarbreen	Glacier	Norway (Spitsbergen)	78.67N; 12.00E	2.6	0.414973	Mass balance (kg m-2 yr-1)																									-322	22	-390	-798	-684	-319	-767	-514	-727	-641	-722	-747	-771	-322	-649
Watson	Glacier	US	48.65N; 121.57W	0.2	-0.69897	Mass balance (kg m-2 yr-1)																		550	-340	-240
White	Glacier	Canada	79.45N; 90.67W	39.4	1.5955	Mass balance (kg m-2 yr-1)	-184	115	190	-46	247	112	-372	-134	-109				-83	-55	-12	-259	-617	128	28	-448	-179	-295	-480	-314	-362	38	-56	-229	-494	-401	-151	32	-106	37	-612	-93	-818	-817	-580	-188
Wolverine	Glacier	US (Alaska)	60.40N; 148.92W	16.7	1.22272	Mass balance (kg m-2 yr-1)	93	-1001	454	-1221	-227	-844	1174	409	-1289	1786	3109	-135	-314	-268	905	-153	1214	767	-1449	-2298	81	-239	-744	-895	-703	-1395	-1901	565	-726	360	206	-593	-404	-2367	-1839	-876	-821	880	-1779	-85
Woolsey	Glacier	Canada	51.12N; 118.62W	3.9	0.591065	Mass balance (kg m-2 yr-1)	70	250		700
Wurtenkees	Glacier	Austria	47.04N; 13.01E	0.8	-0.09691	Mass balance (kg m-2 yr-1)													-1029	30	-1095	-1572	-825	-785	-143	-760	-894	-1248	-484	-1617	-414	-638	-154	-1313	-1135	-680	-300	-966	-2177	-313	-448	-778	-1200	-938	-584	-519
Xiaodongkemadi	Glacier	China	33.17N; 92.13E	1.77	0.247973	Mass balance (kg m-2 yr-1)																			525	49	-191	376	211	-540	-570	-530	370	-670
Yawning	Glacier	US	48.45N; 121.03W	0.3	-0.522879	Mass balance (kg m-2 yr-1)														90	-230	-100	-470	-60	-190	-320	230	-2060	-660	-620	-260	340	500	-2030	1630	-180	-1940	260	-1850	-1780	-3020	-930	-130	480	-1620	170
Yuri	Glacier	Canada	56.97N; 130.68W	3.58	0.553883	Mass balance (kg m-2 yr-1)								-50	-570	-730	-140	-960	-1110	140					-1820	-420
Zavisha	Glacier	Canada	50.8N; 123.42W	6.5	0.812913	Mass balance (kg m-2 yr-1)						1100	-260	390	-690	-670	-200	-520	370	310	-1210
Zongo	Glacier	Bolivia	16.25S; 68.17W	1.9	0.278754	Mass balance (kg m-2 yr-1)																						-900	516	-88	-703	-675	797	-1962	-333	77	557	-58	-86	-521	-1559	-197	-173	257	-631	-739
Number of observations							48	47	45	48	48	46	49	49	49	52	49	56	56	66	59	62	63	69	76	77	74	78	82	83	82	84	85	87	83	84	84	87	92	89	95	94	91	92	92	81
Mean							-227.25	-145.426	-117.622	-1.4375	-30.4375	71.0435	-242.163	-113.837	-411.429	-260.096	-196.429	-336.393	-149.071	-22.3939	-335.373	-396.5	-118.746	-483.159	22.8158	-276.481	-351.946	-254.256	-95	-473.675	-216.561	-286.661	-279.894	-1028.76	-69.6265	-135.363	-753.214	-578	-1261.39	-847.854	-955.174	-1092.46	-547.429	-304.783	-745.5	-858.963
Mean, 10-yr running average												-147.865	-144.783	-163.88	-167.025	-169.121	-199.614	-246.368	-234.027	-270.959	-227.535	-229.173	-244.725	-236.511	-231.104	-276.232	-264.351	-253.367	-269.482	-324.042	-333.286	-319.174	-359.301	-391.675	-508.314	-545.732	-619.594	-700.173	-726.927	-654.529	-722.116	-794.476
Std deviation							580.111	570.114	876.002	933.419	902.428	831.125	775.103	680.912	677.7	764.553	716.405	568.695	687.112	545.676	611.292	463.98	806.067	747.679	1014.19	791.059	662.554	1130.83	875.385	644.666	629.374	607.325	872.251	799.826	934.257	800.287	811.22	660.771	822.299	754.278	1048.48	897.684	777.882	714.012	708.877	1063.34
Std error							83.7319	83.1597	130.587	134.727	130.254	122.543	110.729	97.2732	96.8143	106.024	102.344	75.9951	91.8192	67.168	79.5835	58.9256	101.555	90.0099	116.335	90.1496	77.0203	128.041	96.6701	70.7612	69.5028	66.2646	94.6089	85.7504	102.548	87.3185	88.5113	70.8421	85.7306	79.9533	107.572	92.589	81.5442	74.4409	73.9056	118.149
Notes:
The AAR values with grey shading are from Bahr et al. (2009), and the mass balance values with yellow shading are from Dyurgerov and Meier (2005). The data with blue shading were received from investigators during the preparation of this paper. All other data are from the WGMS database (WGMS, 2012).
One glacier, Urumqihe S. No. 1, split into two branches in 1995. The AAR and mass balance from 1995 onward were derived by averaging observations from the two branches.

## Sheet: B. AAR0 calculations
Name	Glacier/ice cap	Country	Data to right	1971	1972	1973	1974	1975	1976	1977	1978	1979	1980	1981	1982	1983	1984	1985	1986	1987	1988	1989	1990	1991	1992	1993	1994	1995	1996	1997	1998	1999	2000	2001	2002	2003	2004	2005	2006	2007	2008	2009	2010	Calculated AAR0 (significant, p<0.1)	r2-value
n=144
Aalfotbreen	Ice cap outlet	Norway	AAR	75	61		90	92		34	30	47	35	57	46	96	92	30	42			94	96.9	94	92		99	79		60	66	64	96				53	78		97	79	48		56.21	0.78
Abramov	Glacier	Kirgizstan	AAR	37	74	24	40	29	24	5	6	46	26	57	42	48	15	42	28	64	54	50	46	46	68	66	44	46	48	12	64													55.8	0.74
Alexander	Glacier	Canada	AAR									33	42	59.9			53.8					21	16																					56.82	0.88
Andrei	Glacier	Canada	AAR								45	22	65	63.8	35.6	43.3	63.1					47	33																					59.15	0.54
Antizana15Alpha	Glacier	Equador	AAR																									45	60	62	65	84	80	60	50	42	56	55	54	53	85	54	54	71.15	0.79
Austdalsbreen	Ice cap	Norway	AAR																		22	80	77	70	80	87	69	80	30	70	71	68	87				46	78		75	71	56		66.01	0.69
Austre Broggerbreen	Glacier	Norway (Spitsbergen)	AAR	23	32	60	2	35	20	45	20	2	17	14	56	34	6	14	25	83	15	15	8	58	39		48	8	49	7		14	31	7					5	10	25	15	13	49.54	0.78
Baby	Glacier	Canada	AAR	1				99	83																																			61.33	0.99
Bahia Del Diablo	Glacier	Antarctica	AAR																														31	50	30	40	44	38	41	49	32	43		48.03	0.66
Basodino	Glacier	Switz.	AAR																						57	55	67	70	62	51		5	15	76	48		33	5		5	2	70	30	50.99	0.87
Bench	Glacier	Canada	AAR											48.6	21.8	49.9	57.7					34	31																					66.09	0.79
Blue	Glacier	US	AAR	74	72	52	84	72				34	33	32	62	69	60	58	40	53	74	56	45	53	45	42	34	69	53	59	47	92												59.86	0.81
Bondhusbreen	Glacier	Norway	AAR							29	67	66	67																															59.34	0.74
Breidalblikkbrea	Glacier	Norway	AAR																																		17	48		70	44	30		54.56	0.97
Breidamjok. E.B.	Ice cap	Iceland	AAR																												47		48	51	53	60	50	38						74.4	0.8
Brewster	Glacier	New Zealand	AAR																																			88	72	67	10	26		57.15	0.98
Bruarjokull	Ice cap	Iceland	AAR																								67	52	53		45	62	42	66	59	52	49	24	50	54	51	59	14	61.78	0.86
Calderone	Glacier	Italy	AAR																															22		21		21			75	86	84	46.9	0.88
Careser	Glacier	Italy	AAR	17	82	3	25	67	9		64	32	54				3	3				3				14	19			2				12	1							1	10	41.53	0.57
Charquini Sur	Glacier	Bolivia	AAR																																	26	4		39	38	93	29	10	57.8	0.58
Chhota Shigri	Glacier	India	AAR																																	31	31	74	29					69.47	0.99
Ciardoney	Glacier	Italy	AAR																						18	41	4	23	23	25				75	30							15	10	54.02	0.77
Columbia (2057)	Glacier	US	AAR																61	50	60	67	67					55	54	84	20	94	85	20	86	23	12	6	40	60	86	37	63	64.41	0.9
Daniels	Glacier	US	AAR																60	40	60	60	50					70	75	80	13	95	60	13	64	21	22	18	34	62	76	28	60	58.78	0.7
Devon NW	Ice cap	Canada	AAR	52	86	62	49	56	95	47	68	68	42	35	59	79	59	47	83	62	34	49	45	27	84	50	65.7543	45	28	56	29	35	23	18	60	40	65	34	28	24	16	15	22	61.52	0.85
Djankuat	Glacier	Russia	AAR	56	42	44	74	49	57	48	65	49	64	45.3	66.8	55.2	64	44.4	50	80	74	66	63	55	60	79	44	62	62	67	33	49	26	43	43	43	43	43	42	16				55.57	0.58
Dyngjujokull	Ice cap outlet	Iceland	AAR																						75	86	71	66	58	47	59							37					22	60.84	0.83
Easton	Glacier	US	AAR																									62	66	72	44	90	68	44	74	46	50	38	50	70	74	38	77	64.63	0.79
Emmons	Glacier	US	AAR																																	11			40	51	36			52.2	0.91
Engabreen	Ice cap	Norway	AAR	78	65	94	83	89	92	86	43	68	39	89	83	84	86	12	61	86	7	93	84	75	94	87	76	91	88	85	74	51	89		54	55	83	80	26	84	77	63	47	59.81	0.78
Eyjabakkajokull	Ice cap	Iceland	AAR																								61	44	53		29	45	21	60	47	39	37	25	36	47	39	42	18	55.86	0.8
Filleck K.	Glacier	Austria	AAR	16	65	2	98		89	82		73																																57.74	0.91
Findelen	Glacier	Switz.	AAR																																			62	40	62	61			66.84	0.99
Fontana Bianca	Glacier	Italy	AAR																						10	13	19			6			5	95	10							9		54	0.72
Foss	Glacier	US	AAR																71	57	71	64	57					75	75	80	10		70	10	70	25	10		36	54	72	12	62	66.01	0.99
Garabashi	Glacier	Russia	AAR														70	52	38	73	74	60	65	54	66	80	48	55	55	66	13	34	27	42	67	61	66	66	40	42	50	52		60.18	0.95
Goldbergkees	Glacier	Austria	AAR																															18	20		52	51	7	24	20	21	27	41.32	0.55
Golubin	Glacier	Kirgizstan	AAR		80	74	42	58	49	67	67	67	58	84.9	64.4	65.9	75.3	49.7	41.5	77	67	67	52	67	63	63	73																	74.36	0.27
Graafjellsbrea	Glacier	Norway	AAR																																		24	67		80	56	31		56.88	0.92
Graasubreen	Glacier	Norway	AAR	9	3						24	52	5	14		39		36			10	65	65	10	22		44	16	9			9		45			7	13		1		7	4	34.5	0.8
Gries	Glacier	Switz.	AAR	45	74	8	61	71	25	94	81	16	75	54	10	24	61	19	11	21	25	20		17	25	12	51	49	39	9		46	23	48	20		2	1	2	2	5	3	11	54.51	0.89
Gulkana	Glacier	US (Alaska)	AAR	63	54	72	38	58	55	62	62	59	64	69	63	63	61	73	70	64	62	58	58	68	63	45	60	56	61	46	58	52	68	57	51	66	48	56	64	53	66	56	43	64.6	0.76
Hamtah	Glacier	India	AAR																															8	11	11	7		12					20.65	0.64
Hansbreen	Ice cap	Norway (Spitsbergen)	AAR																			45	32	62	45	31	71	25			25	39			25	25	25	65	61	54	60	25	39	53.44	0.65
Hansebreen	Glacier	Norway	AAR																38	76						63		66		50	64	70	81				31	53		89	64			56.28	0.64
Hardangerjokulen	Ice cap	Norway	AAR	84	77	84	82	81	81		85.7335	37.8083	89.8247	84	20	92	87.3407	57	83	87	83.6879	92	92	75	88	92	82	85		74	84	72	92	42	47		75	84		85	82	79		74.19	0.26
Hellstugubreen	Glacier	Norway	AAR	59	29	54	74	29	23	8	52	68	12	29	42	68	25	54	33	81	15	84	87	29	62	83	59	53	38		68	55	66	48	7		23	39		25	57	42		58.85	0.85
Helm	Glacier	Canada	AAR						77	13	13		9			38.7	18.9			10	7	6	8	8					47	22		68	57	23						12	2	12		36.08	0.62
Hidden	Glacier	Canada	AAR												41	47	25																											51.37	0.95
Hintereisferner	Glacier	Austria	AAR	49	66	24	68	71	58	78	77	59	67	64	22	39	63	50	40	45	29	38	32	18	24	48	31	53	41	48	25	39	48	64	51	3	32	29	11		22	25	25	65.23	0.95
Hoegtuvbreen	Glacier	Norway	AAR	42	37	83	54	78	79	54																																		60.1	0.98
Hofsjokull E (Thjorsarjokull)	Ice cap outlet	Iceland	AAR																			70	53	45	72	63	59	47	31	30	30	50	40	30	43	35	37	54	46	44	46	50		53.19	0.87
Hofsjokull N (Satujokull)	Ice cap outlet	Iceland	AAR																		39	58	38	19	67	64	50	38	36	31	35	51	30	40	38	33	30	42	41	51	38	49		50.13	0.86
Hofsjokull SW (Blagnipujokull)	Ice cap	Iceland	AAR																				34	29	52	45	34	27	24	18	12	33	20	20	51	47	24	51	50	45	46	54		48.88	0.56
Hurd	Glacier	Antarctica	AAR																																36	11	54	41	20	22	69	34	77	53.17	0.85
Ice Worm	Glacier	US	AAR																50	30	65	50	40					70	70	75	20		60		72				20	48	60	35		62.3	0.9
IGAN	Glacier	Russia	AAR	31	42	65	11	86	4	5	80	32	86	17																														49.3	0.22
Irenebreen	Glacier	Norway (Spitsbergen)	AAR																																29	25	27	10	24	20	31	6		41.63	0.28
Ivory	Glacier	New Zealand	AAR	35	16	32	0	0																																				47.37	0.83
Jamtalferner	Glacier	Austria	AAR																			34	32	10	7	44	18	63	34	56	9	47	62	61	28		40	15	8	6	9	10	9	57.28	0.89
Johnsons	Glacier	Antarctica	AAR																																55	39	66	76	43	42	67	37	93	54.1	0.58
Jostefonn	Glacier	Norway	AAR																											63	76	79	90											70.98	0.99
Karsojietna	Glacier	Sweden	AAR												61	68							71	55	91	99																		50.62	0.97
Kesselwandferner	Glacier	Austria	AAR	81	85	63	87	86	81	87	80	75	79	77.8	33.7	66.3	77.5	75.1	52	65	56	66	60	21	51	73	33	78	55	74	18	72	74	87	75		61	66	33	22	42	28	26	68.37	0.88
Kleinfleisskees	Glacier	Austria	AAR																															51	13		75	63	10	23	24	26	48	62.5	0.83
Koeldukvislarj kull	Ice cap	Iceland	AAR																									47	48		35	61	47	47	56	52	46	46	54	59	51	57	8	61.54	0.86
Kongsvegen	Ice cap	Norway (Spitsbergen)	AAR																	82	63	53	50	73	68	25	78	28	59	45	8	54	63	13	31	25	5	19	46	39	68	40	52	48.29	0.87
Koryto	Glacier	Russia	AAR												63														83	90	43	85	45											65.51	0.82
Kozelskiy	Glacier	Russia	AAR			77	75	75	73	30	30	29	57	24.2	60	54	51	83	58	45	6	24	37	67	45	47	37	45	68	70														53.68	0.68
La Conejera	Glacier	Colombia	AAR																																				1	8	73	4	2	39.67	0.86
Langfjordjokelen	Glacier	Norway	AAR																			53	53	67	68	64			77	58		45	44					28		42	53		12	62.44	0.49
Langjokull S. Dome	Ice cap	Iceland	AAR																											30	10	40	43	28	28	23	33	41	41	27	28	50		56.35	0.73
Lemon Creek	Glacier	US (Alaska)	AAR																									38	5	5	7	68	82	77	67	5	59	61	68	72	80	51	50	66.74	0.91
Leviy Aktru	Glacier	Russia	AAR							66	49	45	60	57	49	67	68	61	60	62	66	58	61	46	56	72	56	67	61	60	44	60	58	58	56	56	57	62	58	57		67		61.05	0.8
Limmern	Glacier	Switz.	AAR						10	72	93	44	92	44.7	24.8	16	31.7	66.3			42	44																						51.4	0.95
Lower Curtis	Glacier	US	AAR																62	50	69	56	50					60	60	70	30	85	60	25	68	35	30	20	40	60	66	20	58	62.74	0.95
Lynch	Glacier	US	AAR																69	62	75	69	62					70	75	80	25	90	60	25	65	38	20	15	42	70	76	25	56	65.81	0.98
Maarmaglaciaren	Glacier	Sweden	AAR																				26	25	51	54	23	59	19	15	23	15	22	24	15	6	14	15	11	13	43	15	18	32.73	0.5
Maladeta	Glacier	Spain	AAR																						26	35	49	31	41	50	22	20	9	69	10				51	53	34		80	43.69	0.22
Malavalle	Glacier	Italy	AAR																																39	26	47	37	12	9		36	42	50.72	0.72
Maliy Aktru	Glacier	Russia	AAR	83	75	76	22	89	90	87	38	36	80	59	34	82	84	82	71	77	83	76	73	28	67	76	67	75	68	68	27	72	61	61	50	53	63	72	60	55		82		68.38	0.88
Martial Este	Glacier	Argentina	AAR																																	40		13	38	62	56	51		56.1	0.95
Marukh	Glacier	Russia	AAR						53	31	47	41	5																															44.79	0.96
McCall	Glacier	US (Alaska)	AAR	48	47																					30	22	18	58	50	30	44	55											57.8	0.56
Midtre Lovenbreen	Glacier	Norway (Spitsbergen)	AAR	37	46	58	2	48	29	60	29	9	30	23	62	52	21	20	42	77	27	41	19	68	40		66	6	58	36	30		36	18				5	14	26	38	29	29	54.29	0.77
Minaret	Glacier	Canada	AAR												47	58	41																											46.28	0.98
Mittivakkat	Glacier	Greenland	AAR																										56	41		18	5		41	75	5		18		41	18		57.97	0.89
Mutnovskiy NE	Glacier	Russia	AAR											59	74	67	75																											66.82	0.93
Mutnovskiy SW	Glacier	Russia	AAR											61	83	66	71																											67.7	0.99
Nigardsbreen	Ice cap	Norway	AAR	87	61	86	76	81	66	40	56	75	23	63	55	82	75	56	56	90	37	94	82.5	73	89	92	87	91	55	83	93	90	93	64	25		70	87	4	91	91	80	14	60.79	0.71
No. 125 (Vodopadniy)	Glacier	Russia	AAR							74	58	9	61	64	22	71	74	73	71	71	77	73	73	15	72	80	68	72	68	66		71	67	69	66	64	66	71	67	67		85		68.44	0.6
No. 104	Glacier	Russia	AAR																35	30	67																							32.72	0.97
No. 356	Glacier	Russia	AAR															42	38	56	27	37																						45.89	0.98
Noisy Creek	Glacier	US	AAR																								9	68	64				97		83					1	20		30	53.21	0.71
North Klawatti	Glacier	US	AAR																							45		66	74	75	18	79	84		72		19	3	19	50	70		70	59.64	0.82
Obrucheva	Glacier	Russia	AAR	48	73	62	30	68	20	16	81	44	81	25																														50.74	0.93
Ochsentaler	Glacier	Switz.	AAR																					42	21	60	34	63	59	66	36	65												65.16	0.96
Pendente	Glacier	Italy	AAR																										10	60	5	10		61			9	2				7	24	41.55	0.64
Peyto	Glacier	Canada	AAR	39	43	62	58	35	68	52	23	29	38	26	38	46	36	28	40	47	34	39	38	13		14	27	42	62	34		51	73	26	37		29	21	10	40	41	18		46.04	0.48
Place	Glacier	Canada	AAR	25	42	26	77	42	87	17	27		15	13	35	37	35	3		31	25	18	21	23	25	2	3		54	24		76	54	22				1		26	40	5		49.01	0.84
Plattalva	Glacier	Switz.	AAR						9	92		24		42	36	6.2	61.9	84			23	13																						52.21	0.9
Praviy Aktru	Glacier	Russia	AAR										53	36	39	65	62	57	47	53	62	61	45																					47.64	0.81
Rabots Glaciar	Glacier	Sweden	AAR												55.6	51.7	29.9	3.2	45	59	11	74	47	48	71	57	57	57	30	30	42	33	40	12	14	1			19		43	36	13	49.33	0.8
Rainbow	Glacier	US	AAR																70	62	75	59	56					60	68	75	45	90	70	42	68	50	45	38	46	76	80	36	80	66.24	0.93
Ram River	Glacier	Canada	AAR	4	48	57	60	6																																				56	0.94
Rhone	Glacier	Switz.	AAR										64	53	45	48																												50.84	0.99
Riukojietna	Ice cap	Sweden	AAR																2	12			82	60	82	87	26	85	59		5	5	37									2		54.77	0.89
Sandalee	Glacier	US	AAR																									85	85	80	2				9				4	6	50		66	35.69	0.42
Sary-Tor	Glacier	Kirgizstan	AAR															42	38	56	27	37																						44.76	0.51
Sentinel	Glacier	Canada	AAR	72	70	91		74	90	23	64	1	60	62.8	69.5	86.4	82.5	22.1																										54.46	0.94
Sforzellina	Glacier	Italy	AAR																			26			26	30	28	14	10	23	8	18	10											33.11	0.59
Shaune Garang	Glacier	India	AAR												32	47	67.5	57	62	22	46	61.5	46																					55.85	0.81
Sholes	Glacier	US	AAR																									60	65	70	30	95	60	26	65	35	25	15	45	72	75	15	84	63.12	0.98
Shumskiy	Glacier	Russia	AAR															50	37	40	45	56	37	24																				49.54	0.83
Silver	Glacier	US	AAR																							71	34	54	73	60	56	20	69	67	54	37	14	8	6	8	40	13	88	47.48	0.29
Silvretta	Glacier	Switz.	AAR	9	36	6	95	82	49	75	94	46	93	77	10	37	83	68	34	2	32	31	19	6	11	43	33	46	46	43		45	63	71	57		53	26	2	21		6	44	55.37	0.93
Sonnblickkees	Glacier	Austria	AAR	42	64	23	88	83	73	71	92	78	93	82	10	32.6	79	46	7.9	33.4	25.5	75.2	32	22	3	44	9	70	48	78	5	28	60	40	35	1	62	44	29	2	23	48	23	59.37	0.87
South Cascade	Glacier	US	AAR	70	86	15	78	65	78		61	1							48	8	24	48	44	80	8	17	11	25	40	70		84	1		84	7	5	5	10	60	32			52.79	0.69
Spoerteggbreen	Glacier	Norway	AAR																			73	75	62																				61.86	0.94
Storbreen	Glacier	Norway	AAR	68	49	65	77	52	56	25	35	66	5	59	45	72	47	42	51	87	6	90	92	57	68	80	39	35	19	23	77	42	76	24		2	22	43		30	51	53	4	56.24	0.87
Storglaciaren	Glacier	Sweden	AAR	41	27.8	40.5	43	63	48	51	45	39	20	39	52	54	45	33	52	55	27	66	60	47	58	58	41	57	42	41	36	42	53	30	37	29	40	43	17	50	53	43	28	45.19	0.91
Storglombreen	Glacier	Norway	AAR															62	75	5	5												86				78	79						63.82	0.93
Storsteinsfjellbreen	Glacier	Norway	AAR																					43	86	88	57	74																54.98	0.86
Superguksoak	Glacier	Canada	AAR												46	61	20																											49.81	0.99
Suyok Zapadniy	Glacier	Russia	AAR	25													13					23	22	22																				29.64	0.96
Svartisheibreen	Glacier	Norway	AAR																		22	80	73	70	81	81	65	76																59.68	0.78
Tarfalaglaciaren	Glacier	Sweden	AAR																65				54	63													23	0.7		73	30			54.05	0.91
Trollbergdalsbreen	Glacier	Norway	AAR	29	21		21	40															35	38		50	5																	39.47	0.74
Ts. Tuyuksuyskiy	Glacier	Russia	AAR	38	59	38	35	34	37	32	6	25	39	58	37.7	23.5	10	42	34	40	35	37	28	22	38	80	44	31	34		45	45	51	38	35	52	42	48	22	34	22	66	55	51.26	0.8
Tungnaarjokull	Ice cap	Iceland	AAR																62						67	65	60				18	51	40	44	35	45	40	38	41	40	37	48		61.57	0.73
Urumqihe S. No. 1	Glacier	China	AAR	57	67	31	43	68	46	65	28	33	48	29	48	57	58	30	27	49	36	66	71	31	68	69	40	51	67.5	24.5	34.5	32.5	51	39.5	36.5	48.5	41	51	31	32	20.5	64		55.64	0.6
Vermuntglacier	Glacier	Austria	AAR																					3		20	4	41	13	18	3	20												34.48	0.81
Vernagtferner	Glacier	Austria	AAR	39	79	43	81	80	74	88	84	73	77	72.2	24	25	71	61.1	18	54.6	39.3	49.7	31.8	8	22	37	22	39	40	41	30	56	48	47	53		34	40	25	19	17	14	23	66.69	0.94
Waldemarbreen	Glacier	Norway (Spitsbergen)	AAR																										48	42		7	21	1	20	14	21	15	16	13	31	16		46.75	0.75
Watson	Glacier	US	AAR																		80	50	60																					63.64	0.95
White	Glacier	Canada	AAR	59	86	82	69	81	80	59	67	65				71	69	76	62	9	91	90	16	50	16	12	28	46	82	65	65	40	36	51	80	58	75	33	61	25	21	29	58	71.73	0.78
Wolverine	Glacier	US (Alaska)	AAR	71	39	72	42	69	53	78	70	48	90	87	64	67	64	72	65	82	85	42	32	62	65	66	62	64	46	39	73	60	71	73	62	64	37	46	62	62	78	46		66.07	0.85
Woolsey	Glacier	Canada	AAR	54	60		70																																					52.91	0.99
Wurtenkees	Glacier	Austria	AAR													7	57	8	1	14	11	28	21	16	7	15	5	32	11	45	8	13	30	33	4	3	28	16	17	4	15	33	20	36.06	0.66
Xiaodongkemadi	Glacier	China	AAR																			95	78	42	90	80																		63.51	0.87
Yawning	Glacier	US	AAR																									65	74	76	20	90	65	20	77	10	20	15	54	70	70	30	70	65.07	0.92
Yuri	Glacier	Canada	AAR								59	36	23	43	10.1	15.6	61.2																											55.35	0.93
Zavisha	Glacier	Canada	AAR						98	29	72	2	14	30	17	83	75																											47.74	0.94
Zongo	Glacier	Bolivia	AAR																						39	88	64	44	47	89	39	59	66	75	64	76	48	37	71	64	77	65	64	68.78	0.78
Number of observations																																												144
Mean																																												55.2413
Std deviation																																												9.93918
Std error																																												1.6234	(95% confidence interval)
Notes:
For the AAR0 calculations, values AAR = 0 and AAR = 100 are excluded from the linear regression.
The data set includes only GIC for which the linear relationship between AAR and mass balance is significant at the 10% level or better, based on a linear regression t-test. The greater the number of observations, the smaller the value of r2 required for significance.

## Sheet: C. All GIC - alpha, pA, pV
Name	Glacier/ice cap	Country	Data to right	1971	1972	1973	1974	1975	1976	1977	1978	1979	1980	1981	1982	1983	1984	1985	1986	1987	1988	1989	1990	1991	1992	1993	1994	1995	1996	1997	1998	1999	2000	2001	2002	2003	2004	2005	2006	2007	2008	2009	2010		Mean alpha 1971-80	Count Mn	f	Weighted alpha	Variance calc.
n=144
Aalfotbreen	Ice cap outlet	Norway	Alpha	1.33428	1.08522	1.77904	1.60114	1.63672	1.77904	0.604875	0.533713	0.83615	0.622665	1.01405	0.81836	1.70788	1.63672	0.533713	0.747198	1.77904	0	1.6723	1.72389	1.6723	1.63672	1.77904	1.76125	1.40544	0	1.06743	1.17417	1.13859	1.70788	0	0	0	0.942893	1.38765	0	1.72567	1.40544	0.853941	0		1.18128	10	1	1.18128	0.0624249
Abramov	Glacier	Kirgizstan	Alpha	0.663082	1.32616	0.430108	0.716846	0.519713	0.430108	0.0896057	0.107527	0.824373	0.46595	1.02151	0.752688	0.860215	0.268817	0.752688	0.501792	1.14695	0.967742	0.896057	0.824373	0.824373	1.21864	1.1828	0.78853	0.824373	0.860215	0.215054	1.14695														0.557348	10	1	0.557348	0.139941
Alexander	Glacier	Canada	Alpha									0.580781	0.739176	1.05421	0	0	0.94685					0.369588	0.281591																						0.659979	2	0.2	0.131996	0.0147377
Andrei	Glacier	Canada	Alpha								0.760778	0.371936	1.0989	1.07861	0.60186	0.732037	1.06678					0.79459	0.557904																						0.743872	3	0.3	0.223161	0.010554
Antizana15Alpha	Glacier	Equador	Alpha																									0.632467	0.843289	0.871398	0.913563	1.1806	1.12439	0.843289	0.702741	0.590302	0.78707	0.773015	0.75896	0.744905	1.19466	0.75896	0.75896
Austdalsbreen	Ice cap	Norway	Alpha																		0.333283	1.21194	1.16649	1.06045	1.21194	1.31798	1.0453	1.21194	0.454477	1.06045	1.07559	1.03015	1.31798	0	0	0	0.696864	1.18164	0	1.13619	1.07559	0.848356	0
Austre Broggerbreen	Glacier	Norway (Spitsbergen)	Alpha	0.464271	0.645943	1.21114	0.0403714	0.7065	0.403714	0.908357	0.403714	0.0403714	0.343157	0.2826	1.1304	0.686314	0.121114	0.2826	0.504643	1.67541	0.302786	0.302786	0.161486	1.17077	0.787243	0	0.968914	0.161486	0.9891	0.1413	0	0.2826	0.625757	0.1413			0	0	0.100929	0.201857	0.504643	0.322971	0.262414		0.516754	10	1	0.516754	0.17196
Baby	Glacier	Canada	Alpha	0.0163052	1.63052			1.61422	1.35333																																				1.1536	4	0.4	0.461438	0.0197421
Bahia Del Diablo	Glacier	Antarctica	Alpha																														0.64543	1.04102	0.62461	0.832813	0.916094	0.791172	0.853633	1.0202	0.687071	0.895274
Basodino	Glacier	Switz.	Alpha																						1.11787	1.07864	1.31398	1.37282	1.21592	1.0002	0	0.0980584	0.294175	1.49049	0.941361	0	0.647186	0.0980584	0	0.0980584	0.0392234	1.37282	0.588351
Bench	Glacier	Canada	Alpha											0.735361	0.329853	0.755031	0.873052					0.51445	0.469057
Blue	Glacier	US	Alpha	1.23622	1.20281	0.868694	1.40327	1.20281				0.567992	0.551286	0.534581	1.03575	1.15269	1.00234	0.968927	0.668226	0.885399	1.23622	0.935516	0.751754	0.885399	0.751754	0.701637	0.567992	1.15269	0.885399	0.985633	0.785165	1.53692													1.00473	7	0.7	0.703308	0.00376006
Bondhusbreen	Glacier	Norway	Alpha							0.488709	1.12909	1.11223	1.12909																																0.964779	4	0.4	0.385912	0.000444742
Breidalblikkbrea	Glacier	Norway	Alpha																																	0	0.311584	0.879765	0	1.28299	0.806452	0.549853	0
Breidamjok. E.B.	Ice cap	Iceland	Alpha																												0.63172		0.645161	0.685484	0.712366	0.806452	0.672043	0.510753
Brewster	Glacier	New Zealand	Alpha																																			1.53981	1.25984	1.17235	0.174978	0.454943
Bruarjokull	Ice cap	Iceland	Alpha																								1.08449	0.841696	0.857883		0.728391	1.00356	0.679832	1.06831	0.955002	0.841696	0.793137	0.388475	0.809323	0.874069	0.82551	0.955002	0.226611
Calderone	Glacier	Italy	Alpha																															0.469083	0	0.447761	2.1322	0.447761	2.1322	0	1.59915	1.83369	1.79104
Careser	Glacier	Italy	Alpha	0.409343	1.97448	0.0722369	0.601974	1.61329	0.216711		1.54105	0.770527	1.30026				0.0722369	0.0722369	0	0	0	0.0722369	0	0	0	0.337106	0.457501	0	0	0.048158	0	0	0	0.288948	0.024079	0	0	0	0	0	0	0.024079	0.24079		0.944431	9	0.9	0.849988	0.000152014
Charquini Sur	Glacier	Bolivia	Alpha																																	0.449827	0.0692042	0	0.67474	0.657439	1.609	0.50173	0.17301
Chhota Shigri	Glacier	India	Alpha																																	0.446236	0.446236	1.06521	0.417446
Ciardoney	Glacier	Italy	Alpha																						0.33321	0.758978	0.0740466	0.425768	0.425768	0.462792	0	0	0	1.38837	0.55535	0	0	0	0	0	0	0.277675	0.185117
Columbia (2057)	Glacier	US	Alpha																0.947058	0.776277	0.931532	1.04021	1.04021					0.853905	0.838379	1.30415	0.310511	1.4594	1.31967	0.310511	1.3352	0.357087	0.186306	0.0931532	0.621022	0.931532	1.3352	0.574445	0.978109
Daniels	Glacier	US	Alpha																1.02076	0.680504	1.02076	1.02076	0.850629					1.19088	1.27594	1.36101	0.221164	1.6162	1.02076	0.221164	1.08881	0.357264	0.374277	0.306227	0.578428	1.05478	1.29296	0.476353	1.02076
Devon NW	Ice cap	Canada	Alpha	0.841288	1.39136	1.00307	0.792752	0.906002	1.53697	0.760395	1.10015	1.10015	0.679502	0.566251	0.954538	1.27811	0.954538	0.760395	1.34282	1.00307	0.550073	0.792752	0.728038	0.436823	1.359	0.808931	1.06381	0.728038	0.453001	0.906002	0.46918	0.566251	0.372108	0.291215	0.970717	0.647144	1.05161	0.550073	0.453001	0.388287	0.258858	0.24	0.36		1.01116	10	1	1.01116	0.00635663
Djankuat	Glacier	Russia	Alpha	1.00774	0.755803	0.791794	1.33165	0.881771	1.02573	0.863775	1.1697	0.881771	1.1517	0.815188	1.20209	0.993342	1.1517	0.798992	0.899766	1.43963	1.33165	1.18769	1.13371	0.989743	1.07972	1.42163	0.791794	1.11571	1.11571	1.20569	0.593846	0.881771	0.467878	0.773799	0.773799	0.773799	0.773799	0.773799	0.755803	0.287925					0.986144	10	1	0.986144	0.00299306
Dyngjujokull	Ice cap outlet	Iceland	Alpha																						1.23274	1.41354	1.167	1.08481	0.95332	0.772518	0.969757							0.608153					0.361604
Easton	Glacier	US	Alpha																									0.959307	1.0212	1.11403	0.680798	1.39254	1.05214	0.680798	1.14498	0.711744	0.773635	0.587962	0.773635	1.08309	1.14498	0.587962	1.1914
Emmons	Glacier	US	Alpha																																	0.210728			0.766284	0.977011	0.689655
Engabreen	Ice cap	Norway	Alpha	1.30413	1.08677	1.57164	1.38773	1.48805	1.5382	1.43789	0.718943	1.13693	0.652065	1.48805	1.38773	1.40445	1.43789	0.200635	1.0199	1.43789	0.117037	1.55492	1.40445	1.25397	1.57164	1.45461	1.27069	1.52148	1.47133	1.42117	1.23725	0.8527	1.48805	0	0.902859	0.919579	1.38773	1.33757	0.43471	1.40445	1.28741	1.05334	0.785822		1.23224	10	1	1.23224	0.090481
Eyjabakkajokull	Ice cap	Iceland	Alpha																								1.09202	0.787683	0.948801		0.519155	0.805585	0.37594	1.07411	0.841389	0.698174	0.66237	0.447547	0.644468	0.841389	0.698174	0.75188	0.322234
Filleck K.	Glacier	Austria	Alpha	0.277104	1.12574	0.034638	1.69726	1.7319	1.54139	1.42016	1.7319	1.26429	1.7319																																1.25563	10	1	1.25563	0.105102
Findelen	Glacier	Switz.	Alpha																																			0.927588	0.598444	0.927588	0.912627
Fontana Bianca	Glacier	Italy	Alpha																					0	0.185185	0.240741	0.351852	0	0	0.111111	0	0	0.0925926	1.75926	0.185185	0	0	0	0	0	0	0.166667
Foss	Glacier	US	Alpha																1.07559	0.863506	1.07559	0.96955	0.863506					1.13619	1.13619	1.21194	0.151492	1.51492	1.06045	0.151492	1.06045	0.37873	0.151492	0	0.545372	0.818058	1.09074	0.181791	0.939252
Garabashi	Glacier	Russia	Alpha														1.16318	0.864074	0.631439	1.21303	1.22964	0.997009	1.08009	0.897308	1.09671	1.32935	0.797607	0.913925	0.913925	1.09671	0.216019	0.564972	0.448654	0.697906	1.11333	1.01363	1.09671	1.09671	0.664673	0.697906	0.830841	0.864074
Goldbergkees	Glacier	Austria	Alpha																															0.435624	0.484027	0	1.25847	1.23427	0.169409	0.580833	0.484027	0.508228	0.653437
Golubin	Glacier	Kirgizstan	Alpha		1.07585	0.995159	0.56482	0.779989	0.658956	0.901022	0.901022	0.901022	0.779989	1.14174	0.866057	0.886229	1.01264	0.66837	0.558096	1.0355	0.901022	0.901022	0.699301	0.901022	0.84723	0.84723	0.981711																		0.839759	9	0.9	0.755783	0.00756407
Graafjellsbrea	Glacier	Norway	Alpha																																	0	0.421941	1.17792	0	1.40647	0.984529	0.545007	0
Graasubreen	Glacier	Norway	Alpha	0.26087	0.0869565	0	2.89855	0	0	0	0.695652	1.50725	0.144928	0.405797	0	1.13043	0	1.04348	0	2.89855	0.289855	1.88406	1.88406	0.289855	0.637681	2.89855	1.27536	0.463768	0.26087	0		0.26087		1.30435	0	0	0.202899	0.376812	0	0.0289855		0.202899	0.115942		0.55942	10	1	0.55942	0.138395
Gries	Glacier	Switz.	Alpha	0.825537	1.35755	0.146762	1.11906	1.30251	0.458631	1.72445	1.48597	0.293524	1.37589	0.990644	0.183453	0.440286	1.11906	0.34856	0.201798	0.38525	0.458631	0.366905	0	0.311869	0.458631	0.220143	0.935608	0.898918	0.715465	0.165107	0	0.843882	0.421941	0.880572	0.366905	0	0.0366905	0.0183453	0.0366905	0.0366905	0.0917263	0.0550358	0.201798		1.00899	10	1	1.00899	0.00601469
Gulkana	Glacier	US (Alaska)	Alpha	0.975232	0.835913	1.11455	0.588235	0.897833	0.851393	0.959752	0.959752	0.913313	0.990712	1.06811	0.975232	0.975232	0.944272	1.13003	1.08359	0.990712	0.959752	0.897833	0.897833	1.05263	0.975232	0.696594	0.928793	0.866873	0.944272	0.712074	0.897833	0.804954	1.05263	0.882353	0.789474	1.02167	0.743034	0.866873	0.990712	0.820433	1.02167	0.866873	0.665635		0.908669	10	1	0.908669	0.000518291
Hamtah	Glacier	India	Alpha																															0.387409	0.532688	0.532688	0.338983		0.581114
Hansbreen	Ice cap	Norway (Spitsbergen)	Alpha																			0.842066	0.598802	1.16018	0.842066	0.58009	1.32859	0.467814			0.467814	0.72979	0	0	0.467814	0.467814	0.467814	1.21632	1.14147	1.01048	1.12275	0.467814	0.72979
Hansebreen	Glacier	Norway	Alpha																0.675195	1.35039						1.1194	1.77683	1.17271	0	0.888415	1.13717	1.24378	1.43923	0	0	0	0.550817	0.94172	0	1.58138	1.13717	0	0
Hardangerjokulen	Ice cap	Norway	Alpha	1.13223	1.03788	1.13223	1.10527	1.09179	1.09179		1.15559	0.509614	1.21074	1.13223	0.269578	1.24006	1.17726	0.768298	1.11875	1.17266	1.12802	1.24006	1.24006	1.01092	1.18614	1.24006	1.10527	1.14571	0	0.997439	1.13223	0.970481	1.24006	0.566114	0.633509	0	1.01092	1.13223	0	1.14571	1.10527	1.06483	0		1.0519	9	0.9	0.946713	0.0130614
Hellstugubreen	Glacier	Norway	Alpha	1.00255	0.492778	0.917587	1.25743	0.492778	0.390824	0.135939	0.883602	1.15548	0.203908	0.492778	0.713679	1.15548	0.424809	0.917587	0.560748	1.37638	0.254885	1.42736	1.47833	0.492778	1.05353	1.41037	1.00255	0.900595	0.645709	0	1.15548	0.934579	1.1215	0.815633	0.118946	0	0.390824	0.662702	0	0.424809	0.968564	0.713679	0		0.693288	10	1	0.693288	0.0567139
Helm	Glacier	Canada	Alpha						2.13415	0.36031	0.36031	0	0.249446			1.07262	0.523836	0		0.277162	0.194013	0.166297	0.221729	0.221729	0	0	0	0	1.30266	0.609756	0	1.8847	1.57982	0.637472			0	0	0	0.332594	0.0554324	0.332594			0.620843	5	0.5	0.310421	0.0482337
Hidden	Glacier	Canada	Alpha												0.798131	0.914931	0.486665
Hintereisferner	Glacier	Austria	Alpha	0.751188	1.0118	0.367929	1.04247	1.08846	0.889161	1.19577	1.18044	0.904492	1.02713	0.981144	0.337268	0.597884	0.965813	0.766518	0.613215	0.689867	0.444581	0.582554	0.490572	0.275947	0.367929	0.735858	0.475241	0.81251	0.628545	0.735858	0.383259	0.597884	0.735858	0.981144	0.781849	0.0459911	0.490572	0.444581	0.168634	0	0.337268	0.383259	0.383259		0.945884	10	1	0.945884	0.000208775
Hoegtuvbreen	Glacier	Norway	Alpha	0.698835	0.615641	1.38103	0.898502	1.29784	1.31448	0.898502																																			1.01498	7	0.7	0.710483	0.00488529
Hofsjokull E (Thjorsarjokull)	Ice cap outlet	Iceland	Alpha																			1.31604	0.996428	0.846024	1.35364	1.18443	1.10923	0.883625	0.582816	0.564016	0.564016	0.940026	0.752021	0.564016	0.808423	0.658018	0.695619	1.01523	0.864824	0.827223	0.864824	0.940026
Hofsjokull N (Satujokull)	Ice cap outlet	Iceland	Alpha																		0.777977	1.15699	0.758029	0.379015	1.33653	1.27668	0.997407	0.758029	0.718133	0.618392	0.698185	1.01735	0.598444	0.797925	0.758029	0.658288	0.598444	0.837822	0.817874	1.01735	0.758029	0.977459
Hofsjokull SW (Blagnipujokull)	Ice cap	Iceland	Alpha																				0.695581	0.59329	1.06383	0.920622	0.695581	0.552373	0.490998	0.368249	0.245499	0.675123	0.409165	0.409165	1.04337	0.961538	0.490998	1.04337	1.02291	0.920622	0.94108	1.10475
Hurd	Glacier	Antarctica	Alpha																																0.677074	0.206884	1.01561	0.771112	0.376152	0.413767	1.29772	0.639458	1.44819
Ice Worm	Glacier	US	Alpha																0.802568	0.481541	1.04334	0.802568	0.642055					1.1236	1.1236	1.20385	0.321027	1.60514	0.963082	0	1.1557	0	0	0	0.321027	0.770465	0.963082	0.561798	0.963082
IGAN	Glacier	Russia	Alpha	0.628803	0.851927	1.31846	0.223124	1.74442	0.0811359	0.10142	1.62272	0.649087	1.74442	0.344828																															0.896552	10	1	0.896552	0.00121682
Irenebreen	Glacier	Norway (Spitsbergen)	Alpha																																0.696613	0.600528	0.648571	0.240211	0.576507	0.480423	0.744655	0.144127
Ivory	Glacier	New Zealand	Alpha	0.738864	0.337767	0.675533	0	0																																					0.350433	5	0.5	0.175216	0.168782
Jamtalferner	Glacier	Austria	Alpha																			0.593575	0.558659	0.174581	0.122207	0.768156	0.314246	1.09986	0.593575	0.977654	0.157123	0.820531	1.0824	1.06494	0.488827	0	0.698324	0.261872	0.139665	0.104749	0.157123	0.174581	0.157123
Johnsons	Glacier	Antarctica	Alpha																																1.01664	0.720887	1.21996	1.40481	0.794824	0.77634	1.23845	0.683919	1.71904
Jostefonn	Glacier	Norway	Alpha																										0	0.887574	1.07072	1.11299	1.26796
Karsojietna	Glacier	Sweden	Alpha												1.20506	1.34334							1.40261	1.08653	1.79771	1.95575
Kesselwandferner	Glacier	Austria	Alpha	1.18473	1.24324	0.921457	1.27249	1.25786	1.18473	1.27249	1.1701	1.09697	1.15548	1.13793	0.492906	0.969724	1.13354	1.09843	0.760568	0.950709	0.819073	0.965336	0.877578	0.307152	0.745941	1.06772	0.482668	1.14085	0.804446	1.08235	0.263273	1.05309	1.08235	1.27249	1.09697	0	0.892204	0.965336	0.482668	0.321779	0.614305	0.409536	0.380284		1.17595	10	1	1.17595	0.0597898
Kleinfleisskees	Glacier	Austria	Alpha																															0.816	0.208	0	1.2	1.008	0.16	0.368	0.384	0.416	0.768
Koeldukvislarj kull	Ice cap	Iceland	Alpha																									0.763731	0.779981		0.568736	0.991225	0.763731	0.763731	0.909977	0.844979	0.747481	0.747481	0.877478	0.958726	0.828729	0.926227	0.129997
Kongsvegen	Ice cap	Norway (Spitsbergen)	Alpha																	1.69807	1.30462	1.09754	1.03541	1.5117	1.40816	0.455581	1.61524	0.57983	1.22179	0.93187	0.165666	1.11824	1.30462	0.269207	0.641955	0.517706	0.103541	0.393456	0.952578	0.807621	1.38745	0.828329	1.07683
Koryto	Glacier	Russia	Alpha												0.961685														1.26698	1.37384	0.656388	1.29751	0.686918
Kozelskiy	Glacier	Russia	Alpha			1.43443	1.39717	1.39717	1.35991	0.558867	0.558867	0.540238	1.06185	0.45082	1.11773	1.00596	0.950075	1.5462	1.08048	0.838301	0.111773	0.447094	0.68927	1.24814	0.838301	0.875559	0.68927	0.838301	1.26677	1.30402															1.03856	8	0.8	0.830849	0.00918097
La Conejera	Glacier	Colombia	Alpha																																				0.025208	0.201664	1.84018	0.100832	0.0504159
Langfjordjokelen	Glacier	Norway	Alpha																			0.848815	0.848815	1.07303	1.08905	1.02498			1.23318	0.928892	0	0.720692	0.704676	0	0	0	0	0.44843	0	0.672646	0.848815	0	0.192184
Langjokull S. Dome	Ice cap	Iceland	Alpha																											0.532387	0.177462	0.709849	0.763088	0.496894	0.496894	0.408163	0.585626	0.727595	0.727595	0.479148	0.496894	0.887311	0
Lemon Creek	Glacier	US (Alaska)	Alpha																									0.569374	0.0749176	0.0749176	0.104885	1.01888	1.22865	1.15373	1.0039	0.0749176	0.884028	0.913995	1.01888	1.07881	1.19868	0.958945	0.749176
Leviy Aktru	Glacier	Russia	Alpha							1.08108	0.802621	0.737101	0.982801	0.933661	0.802621	1.09746	1.11384	0.999181	0.982801	1.01556	1.08108	0.950041	0.999181	0.753481	0.917281	1.17936	0.917281	1.09746	0.999181	0.982801	0.720721	0.982801	0.950041	0.950041	0.917281	0.917281	0.933661	1.01556	0.950041	0.933661		1.09746			0.900901	4	0.4	0.36036	0.000372926
Limmern	Glacier	Switz.	Alpha						0.194553	1.40078	1.80934	0.856031	1.78988	0.86965	0.48249	0.311284	0.616732	1.28988			0.817121	0.856031																							1.21012	5	0.5	0.605058	0.0388318
Lower Curtis	Glacier	US	Alpha																0.988205	0.79694	1.09978	0.892573	0.79694					0.956328	0.956328	1.11572	0.478164	1.3548	0.956328	0.39847	1.08384	0.557858	0.478164	0.318776	0.637552	0.956328	1.05196	0.318776	0.92445
Lynch	Glacier	US	Alpha																1.04847	0.942106	1.13964	1.04847	0.942106					1.06367	1.13964	1.21562	0.379881	1.36757	0.911716	0.379881	0.987692	0.57742	0.303905	0.227929	0.638201	1.06367	1.15484	0.379881	0.850935
Maarmaglaciaren	Glacier	Sweden	Alpha																				0.794378	0.763825	1.5582	1.64986	0.702719	1.80263	0.580507	0.458295	0.702719	0.458295	0.672166	0.733272	0.458295	0.183318	0.427742	0.458295	0.336083	0.397189	1.31378	0.458295	0.549954
Maladeta	Glacier	Spain	Alpha																						0.595102	0.801099	1.12154	0.709545	0.93843	1.14443	0.503548	0.457771	0.205997	1.57931	0.228885	0	0	0	1.16732	1.21309	0.77821	0	1.83108
Malavalle	Glacier	Italy	Alpha																																0.768927	0.512618	0.926656	0.729495	0.236593	0.177445	0.177445	0.709779	0.828076
Maliy Aktru	Glacier	Russia	Alpha	1.21381	1.09681	1.11144	0.321732	1.30155	1.31617	1.2723	0.555718	0.52647	1.16993	0.862825	0.497221	1.19918	1.22843	1.19918	1.03832	1.12606	1.21381	1.11144	1.06756	0.409476	0.979819	1.11144	0.979819	1.09681	0.994443	0.994443	0.394852	1.05294	0.892074	0.892074	0.731208	0.77508	0.921322	1.05294	0.87745	0.804329		1.19918			0.988593	10	1	0.988593	0.00326708
Martial Este	Glacier	Argentina	Alpha																															1.78253	0	0.713012	0	0.231729	0.677362	1.10517	0.998217	0.909091
Marukh	Glacier	Russia	Alpha						1.1833	0.692119	1.04934	0.915383	0.111632																																0.790355	5	0.5	0.395177	0.00995175
McCall	Glacier	US (Alaska)	Alpha	0.83045	0.813149																					0.519031	0.380623	0.311419	1.00346	0.865052	0.519031	0.761246	0.951557												0.821799	2	0.2	0.16436	0.00240399
Midtre Lovenbreen	Glacier	Norway (Spitsbergen)	Alpha	0.681525	0.847302	1.06834	0.0368392	0.884141	0.534168	1.10518	0.534168	0.165776	0.552588	0.423651	1.14202	0.957819	0.386812	0.368392	0.773623	1.41831	0.497329	0.755204	0.349972	1.25253	0.736784	0	1.21569	0.110518	1.06834	0.663106	0.552588		0.663106	0.331553			0	0.092098	0.257874	0.47891	0.699945	0.534168	0.534168		0.641002	10	1	0.641002	0.0843512
Minaret	Glacier	Canada	Alpha												1.01556	1.25324	0.885912
Mittivakkat	Glacier	Greenland	Alpha																										0.966017	0.707262	0	0.310505	0.0862515	0	0.707262	1.29377	0.0862515	0	0.310505	0	0.707262	0.310505	0
Mutnovskiy NE	Glacier	Russia	Alpha											0.882969	1.10745	1.00269	1.12242
Mutnovskiy SW	Glacier	Russia	Alpha											0.901034	1.226	0.974889	1.04874
Nigardsbreen	Ice cap	Norway	Alpha	1.43116	1.00345	1.41471	1.25021	1.33246	1.0857	0.658003	0.921204	1.23376	0.378352	1.03635	0.904754	1.34891	1.23376	0.921204	0.921204	1.48051	0.608653	1.54631	1.35713	1.20086	1.46406	1.51341	1.43116	1.49696	0.904754	1.36536	1.52986	1.48051	1.52986	1.0528	0.411252	0	1.15151	1.43116	0.0658003	1.49696	1.49696	1.31601	0.230301		1.0709	10	1	1.0709	0.0194505
No. 125 (Vodopadniy)	Glacier	Russia	Alpha							1.08124	0.847458	0.131502	0.891292	0.935126	0.321449	1.03741	1.08124	1.06663	1.03741	1.03741	1.12507	1.06663	1.06663	0.21917	1.05202	1.16891	0.993571	1.05202	0.993571	0.964348	0	1.03741	0.97896	1.00818	0.964348	0.935126	0.964348	1.03741	0.97896	0.97896		1.24196			0.737873	4	0.4	0.295149	0.0149865
No. 104	Glacier	Russia	Alpha																1.06968	0.91687	2.04768
No. 356	Glacier	Russia	Alpha															0.915232	0.828067	1.22031	0.588363	0.806276
Noisy Creek	Glacier	US	Alpha																							0	0.169141	1.27796	1.20278	1.87935	0	1.87935	1.82297	0	1.55986	0	0	0	0	0.0187935	0.375869	0	0.563804
North Klawatti	Glacier	US	Alpha																							0.754527	0	1.10664	1.24078	1.25755	0.301811	1.32461	1.40845	0	1.20724	0	0.318578	0.0503018	0.318578	0.838364	1.17371	0	1.17371
Obrucheva	Glacier	Russia	Alpha	0.945999	1.43871	1.22192	0.59125	1.34017	0.394166	0.315333	1.59637	0.867166	1.59637	0.492708																															1.03074	10	1	1.03074	0.00986252
Ochsentaler	Glacier	Switz.	Alpha																					0.644567	0.322284	0.92081	0.521793	0.966851	0.905463	1.01289	0.552486	0.997545
Pendente	Glacier	Italy	Alpha																										0.240674	1.44404	0.120337	0.240674	0	1.46811	0	0	0.216606	0.0481348	0	0	0	0.168472	0.577617
Peyto	Glacier	Canada	Alpha	0.847089	0.93397	1.34666	1.25977	0.760209	1.47698	1.12945	0.499566	0.629887	0.825369	0.564726	0.825369	0.999131	0.781929	0.608167	0.86881	1.02085	0.738488	0.847089	0.825369	0.282363		0.304083	0.586447	0.91225	1.34666	0.738488	0	1.10773	1.58558	0.564726	0.803649	0	0.629887	0.456125	0.217202	0.86881	0.89053	0.390964			0.970895	10	1	0.970895	0.0015571
Place	Glacier	Canada	Alpha	0.5101	0.856968	0.530504	1.57111	0.856968	1.77515	0.346868	0.550908	0	0.30606	0.265252	0.71414	0.754948	0.71414	0.061212		0.632524	0.5101	0.367272	0.428484	0.469292	0.5101	0.040808	0.061212	0	1.10182	0.489696	0	1.5507	1.10182	0.448888			0	0.020404	0	0.530504	0.81616	0.10202			0.730463	10	1	0.730463	0.0403896
Plattalva	Glacier	Switz.	Alpha						0.172381	1.76211	1.91534	0.459682	1.91534	0.804444	0.689523	0.118751	1.1856	1.60889			0.440529	0.248994																							1.24497	5	0.5	0.622486	0.0491529
Praviy Aktru	Glacier	Russia	Alpha										1.11251	0.755668	0.81864	1.3644	1.30143	1.19647	0.986566	1.11251	1.30143	1.28044	0.944584																						1.11251	1	0.1	0.111251	0.00327884
Rabots Glaciar	Glacier	Sweden	Alpha												1.1271	1.04804	0.606122	0.0648692	0.912224	1.19603	0.222988	1.5001	0.952767	0.973039	1.43929	1.15548	1.15548	1.15548	0.608149	0.608149	0.851409	0.668964	0.810866	0.24326	0.283803	0.0202716			0.385161		0.871681	0.729779	0.263531
Rainbow	Glacier	US	Alpha																1.05676	0.93599	1.13225	0.8907	0.845411					0.905797	1.02657	1.13225	0.679348	1.3587	1.05676	0.634058	1.02657	0.754831	0.679348	0.573671	0.694444	1.14734	1.20773	0.543478	1.20773
Ram River	Glacier	Canada	Alpha	0.0714286	0.857143	1.01786	1.07143	0.107143																																					0.625	5	0.5	0.3125	0.0469511
Rhone	Glacier	Switz.	Alpha										1.25885	1.04249	0.88513	0.944138																													1.25885	1	0.1	0.125885	0.0107202
Riukojietna	Ice cap	Sweden	Alpha																0.0365163	0.219098	0	1.82582	1.49717	1.09549	1.49717	1.58846	0.474712	1.55194	1.07723	0	0.0912909	0.0912909	0.675552		0	0			0	0	0	0.0365163	0
Sandalee	Glacier	US	Alpha																									2.38162	2.38162	2.24152	0.0560381	2.80191	2.80191	0	0.252171	0	0	0	0.112076	0.168114	1.12076	0	1.84926
Sary-Tor	Glacier	Kirgizstan	Alpha															0.938338	0.848972	1.25112	0.603217	0.826631
Sentinel	Glacier	Canada	Alpha	1.32207	1.28535	1.67095	1.83621	1.3588	1.65259	0.422328	1.17517	0.0183621	1.10173	1.15314	1.27617	1.58649	1.51487	0.405802																											1.18436	10	1	1.18436	0.0639689
Sforzellina	Glacier	Italy	Alpha																	0	0	0.785261	0	0	0.785261	0.906071	0.845666	0.422833	0.302024	0.694654	0.241619	0.543642	0.302024
Shaune Garang	Glacier	India	Alpha												0.572963	0.84154	1.20859	1.02059	1.11012	0.393912	0.823635	1.10116	0.823635
Sholes	Glacier	US	Alpha																									0.95057	1.02978	1.109	0.475285	1.50507	0.95057	0.411914	1.02978	0.554499	0.396071	0.237643	0.712928	1.14068	1.18821	0.237643	1.3308
Shumskiy	Glacier	Russia	Alpha															1.00929	0.746871	0.807428	0.908357	1.1304	0.746871	0.484457
Silver	Glacier	US	Alpha																							1.49537	0.716091	1.13732	1.53749	1.26369	1.17944	0.42123	1.45324	1.41112	1.13732	0.779275	0.294861	0.168492	0.126369	0.168492	0.84246	0.273799	1.85341
Silvretta	Glacier	Switz.	Alpha	0.162543	0.650172	0.108362	1.71573	1.48095	0.884956	1.35452	1.69767	0.830775	1.67961	1.39064	0.180603	0.668232	1.49901	1.2281	0.614051	0.0361206	0.57793	0.55987	0.343146	0.108362	0.198664	0.776594	0.595991	0.830775	0.830775	0.776594	0	0.812714	1.1378	1.28228	1.02944	0	0.957197	0.469568	0.0361206	0.379267	0.55987	0.108362	0.794654		1.05653	10	1	1.05653	0.0156485
Sonnblickkees	Glacier	Austria	Alpha	0.707428	1.07799	0.387401	1.48223	1.39801	1.22958	1.19589	1.5496	1.31379	1.56645	1.38117	0.168435	0.549099	1.33064	0.774802	0.133064	0.562574	0.42951	1.26663	0.538993	0.370558	0.0505306	0.741115	0.151592	1.17905	0.808489	1.31379	0.0842176	0.471619	1.01061	0.673741	0.589523	0.0168435	1.0443	0.741115	0.488462	0.033687	0.387401	0.808489	0.387401		1.19084	10	1	1.19084	0.0672896
South Cascade	Glacier	US	Alpha	1.32601	1.6291	0.284145	1.47755	1.23129	1.47755	0	1.15552	0.018943	0						0.909263	0.151544	0.454632	0.909263	0.833491	1.51544	0.151544	0.322031	0.208373	0.473575	0.757719	1.32601	0	1.59121	0.018943	0	1.59121	0.132601	0.0947149	0.0947149	0.18943	1.13658	0.606175	0			0.860011	10	1	0.860011	0.0051013
Spoerteggbreen	Glacier	Norway	Alpha																		0	1.18008	1.21242	1.00226
Storbreen	Glacier	Norway	Alpha	1.2091	0.871266	1.15576	1.36913	0.924609	0.995733	0.444523	0.622333	1.17354	0.0889047	1.04908	0.800142	1.28023	0.835704	0.746799	0.906828	1.54694	0.106686	1.60028	1.63585	1.01351	1.2091	1.42248	0.693457	0.622333	0.337838	0.408962	1.36913	0.746799	1.35135	0.426743	0	0.0355619	0.391181	0.76458	0	0.533428	0.906828	0.94239	0.0711238		0.885491	10	1	0.885491	0.00211085
Storglaciaren	Glacier	Sweden	Alpha	0.90728	0.61518	0.896216	0.951538	1.39411	1.06218	1.12857	0.995796	0.863023	0.442576	0.863023	1.1507	1.19495	0.995796	0.73025	1.1507	1.21708	0.597477	1.4605	1.32773	1.04005	1.28347	1.28347	0.90728	1.26134	0.929409	0.90728	0.796636	0.929409	1.17283	0.663864	0.818765	0.641735	0.885152	0.951538	0.376189	1.10644	1.17283	0.818765	0.619606		0.925647	10	1	0.925647	3.34949e-05
Storglombreen	Glacier	Norway	Alpha															0.971482	1.17518	0.0783453	0.0783453												1.34754	0	0	0	1.22219	1.23786
Storsteinsfjellbreen	Glacier	Norway	Alpha																					0.782103	1.56421	1.60058	1.03674	1.34594
Superguksoak	Glacier	Canada	Alpha												0.923509	1.22465	0.401526
Suyok Zapadniy	Glacier	Russia	Alpha	0.843455													0.438596					0.775978	0.74224	0.74224																					0.843455	1	0.1	0.0843455	0.000774047
Svartisheibreen	Glacier	Norway	Alpha																		0.368633	1.34048	1.22319	1.17292	1.35724	1.35724	1.08914	1.27346
Tarfalaglaciaren	Glacier	Sweden	Alpha																1.20259	1.85014	0	1.85014	0.999075	1.16559	1.85014												0.425532	0.012951	0	1.3506	0.555042		0
Trollbergdalsbreen	Glacier	Norway	Alpha	0.734735	0.53205	2.53357	0.53205	1.01343															0.886749	0.962757	2.53357	1.26678	0.126678																		1.06917	5	0.5	0.534583	0.00948501
Ts. Tuyuksuyskiy	Glacier	Russia	Alpha	0.741319	1.15099	0.741319	0.682794	0.663285	0.72181	0.624268	0.11705	0.48771	0.760827	1.13149	0.735466	0.458447	0.195084	0.819352	0.663285	0.780336	0.682794	0.72181	0.546235	0.429185	0.741319	1.56067	0.858369	0.60476	0.663285	0	0.877877	0.877877	0.994928	0.741319	0.682794	1.01444	0.819352	0.936403	0.429185	0.663285	0.429185	1.28755	1.07296		0.669138	10	1	0.669138	0.0687997
Tungnaarjokull	Ice cap	Iceland	Alpha																1.00698						1.08819	1.05571	0.974501				0.29235	0.828325	0.649667	0.714634	0.568459	0.730875	0.649667	0.617184	0.665909	0.649667	0.600942	0.7796	0
Urumqihe S. No. 1	Glacier	China	Alpha	1.02444	1.20417	0.557153	0.772825	1.22214	0.826743	1.16822	0.503235	0.593098	0.862689	0.521208	0.862689	1.02444	1.04242	0.53918	0.485262	0.880661	0.647017	1.1862	1.27606	0.557153	1.22214	1.24012	0.718907	0.916607	1.21316	0.440331	0.620058	0.584112	0.916607	0.709921	0.656003	0.871675	0.73688	0.916607	0.557153	0.575126	0.305536	1.15025	0		0.873472	10	1	0.873472	0.00335964
Vermuntglacier	Glacier	Austria	Alpha																					0.087007	0	0.580046	0.116009	1.1891	0.37703	0.522042	0.087007	0.580046
Vernagtferner	Glacier	Austria	Alpha	0.584795	1.18459	0.644774	1.21457	1.19958	1.10961	1.31954	1.25956	1.09462	1.1546	1.08262	0.359874	0.374869	1.06463	0.916179	0.269906	0.818713	0.589294	0.745239	0.476833	0.119958	0.329885	0.554806	0.329885	0.584795	0.59979	0.614785	0.449843	0.839706	0.719748	0.704753	0.794722	0	0.509822	0.59979	0.374869	0.2849	0.254911	0.209927	0.344879		1.07662	10	1	1.07662	0.0210797
Waldemarbreen	Glacier	Norway (Spitsbergen)	Alpha																										1.02674	0.898396	0	0.149733	0.449198	0.0213904	0.427807	0.299465	0.449198	0.320856	0.342246	0.278075	0.663102	0.342246
Watson	Glacier	US	Alpha																		1.25707	0.785669	0.942803
White	Glacier	Canada	Alpha	0.822529	1.19894	1.14318	0.961941	1.12923	1.11529	0.822529	0.934058	0.906176				0.989823	0.961941	1.05953	0.864352	0.125471	1.26865	1.25471	0.223059	0.697058	0.223059	0.167294	0.390353	0.641294	1.14318	0.906176	0.906176	0.557647	0.501882	0.711	1.11529	0.808588	1.04559	0.460059	0.850411	0.348529	0.292765	0.404294	0.808588		1.00376	9	0.9	0.903388	0.00470838
Wolverine	Glacier	US (Alaska)	Alpha	1.07462	0.590283	1.08975	0.635689	1.04435	0.80218	1.18057	1.05948	0.726502	1.36219	1.31679	0.96867	1.01408	0.96867	1.08975	0.983805	1.24111	1.28651	0.635689	0.484335	0.938399	0.983805	0.998941	0.938399	0.96867	0.696231	0.590283	1.10489	0.908128	1.07462	1.10489	0.938399	0.96867	0.560012	0.696231	0.938399	0.938399	1.18057	0.696231			0.956561	10	1	0.956561	0.00063134
Woolsey	Glacier	Canada	Alpha	1.0206	1.134		1.323																																						1.1592	3	0.3	0.34776	0.0155633
Wurtenkees	Glacier	Austria	Alpha													0.194121	1.5807	0.221852	0.0277316	0.388242	0.305047	0.776484	0.582363	0.443705	0.194121	0.415973	0.138658	0.88741	0.305047	1.24792	0.221852	0.36051	0.831947	0.915141	0.110926	0.0831947	0.776484	0.443705	0.471436	0.110926	0.415973	0.915141	0.554631
Xiaodongkemadi	Glacier	China	Alpha																			1.49583	1.22815	0.661313	1.4171	1.25964
Yawning	Glacier	US	Alpha																									0.998924	1.13724	1.16797	0.307361	1.38313	0.998924	0.307361	1.18334	0.153681	0.307361	0.230521	0.829876	1.07576	1.07576	0.461042	1.07576
Yuri	Glacier	Canada	Alpha								1.06594	0.650407	0.415537	0.776874	0.182475	0.281843	1.10569					0																							0.710629	3	0.3	0.213189	0.0146265
Zavisha	Glacier	Canada	Alpha						2.05279	0.607457	1.50817	0.0418936	0.293255	0.628404	0.356096	1.73858	1.57101	0																											0.900712	5	0.5	0.450356	0.000471938
Zongo	Glacier	Bolivia	Alpha																						0.567025	1.27944	0.930503	0.639721	0.683338	1.29398	0.567025	0.857808	0.959581	1.09043	0.930503	1.10497	0.697877	0.537947	1.03228	0.930503	1.11951	0.799651	0.930503
Number of observations				42	42	40	41	41	42	42	45	47	48	45	50	52	53	47	54	57	63	71	70	61	63	68	67	78	81	79	83	80	80	81	82	87	89	91	93	90	86	87	71			Nf	43	40.0517	1.77239
Mean				0.82774	1.00342	0.927287	1.04873	1.08034	1.00724	0.852266	0.997694	0.706385	0.896448	0.862254	0.744626	0.944922	0.933116	0.772178	0.78633	0.951695	0.687825	0.96127	0.84276	0.729273	0.929026	0.971977	0.787883	0.900557	0.831722	0.861716	0.482004	0.91888	0.885512	0.644852	0.672029	0.386663	0.571542	0.580487	0.466361	0.675283	0.79916	0.576104	0.588712				Mean	0.931435	0.205426
10-yr running mean									0.934754	0.938206	0.912326	0.91409	0.902529	0.871712	0.849622	0.859565	0.828578	0.854066	0.848697	0.835399	0.853839	0.856545	0.842022	0.854859	0.859399	0.850401	0.829819	0.82558	0.829855	0.821413	0.795713	0.737182	0.715548	0.683541	0.647005	0.628361	0.660077	0.625799	0.596119									Std error	0.0614013
Std deviation				0.355379	0.362978	0.535253	0.564819	0.433009	0.54106	0.465273	0.451182	0.395307	0.507186	0.308682	0.361496	0.383719	0.399081	0.39763	0.334205	0.536024	0.453449	0.411764	0.404123	0.420013	0.535995	0.535645	0.426663	0.412953	0.416239	0.441373	0.406128	0.493421	0.484442	0.465637	0.407543	0.378984	0.412024	0.432499	0.402139	0.444274	0.435647	0.395029	0.521445
Std error				0.0548361	0.0560087	0.0846309	0.0882099	0.0676247	0.0834874	0.0717931	0.0672583	0.0576615	0.0732061	0.0460157	0.0511233	0.0532123	0.054818	0.0580003	0.0454795	0.0709981	0.0571291	0.0488674	0.0483019	0.0537772	0.0675291	0.0649564	0.0521252	0.0467578	0.0462488	0.0496583	0.0445783	0.0551662	0.0541623	0.0517374	0.0450056	0.0406314	0.0436745	0.0453382	0.0416999	0.0468305	0.046977	0.0423516	0.0618841
Name	Glacier/ice cap	Country	Data to right	2001	2002	2003	2004	2005	2006	2007	2008	2009	2010		Mean alpha 2001-10	Count Mn	f	Weighted alpha	Variance calc.
n=144
Aalfotbreen	Ice cap outlet	Norway	AAR	0	0	0	53	78	0	97	79	48	0		35.5	10	1	35.5	2.01428
Abramov	Glacier	Kirgizstan	AAR
Alexander	Glacier	Canada	AAR
Andrei	Glacier	Canada	AAR
Antizana15Alpha	Glacier	Equador	AAR	60	50	42	56	55	54	53	85	54	54		56.3	10	1	56.3	493.695
Austdalsbreen	Ice cap	Norway	AAR	0	0	0	46	78	0	75	71	56	0		32.6	10	1	32.6	2.19261
Austre Broggerbreen	Glacier	Norway (Spitsbergen)	AAR	7			0	0	5	10	25	16	13		9.5	8	0.8	7.6	483.37
Baby	Glacier	Canada	AAR
Bahia Del Diablo	Glacier	Antarctica	AAR	50	30	40	44	38	41	49	33	43			40.8889	9	0.9	36.8	41.7157
Basodino	Glacier	Switz.	AAR	76	48	0	33	5	0	5	2	70	30		26.9	10	1	26.9	51.5631
Bench	Glacier	Canada	AAR
Blue	Glacier	US	AAR
Bondhusbreen	Glacier	Norway	AAR
Breidalblikkbrea	Glacier	Norway	AAR			0	17	48	0	70	44	30	0		26.125	8	0.8	20.9	50.6351
Breidamjok. E.B.	Ice cap	Iceland	AAR	51	53	60	50	38							50.4	5	0.5	25.2	133.159
Brewster	Glacier	New Zealand	AAR					88	72	67	10	26			52.6	5	0.5	26.3	171.481
Bruarjokull	Ice cap	Iceland	AAR	66	59	52	49	24	50	54	51	59	14		47.8	10	1	47.8	188.218
Calderone	Glacier	Italy	AAR	22	0	21	100	21	100	0	75	86	84		50.9	10	1	50.9	282.887
Careser	Glacier	Italy	AAR	12	1	0	0	0	0	0	0	1	10		2.4	10	1	2.4	1003.67
Charquini Sur	Glacier	Bolivia	AAR			26	4	0	39	38	93	29	10		29.875	8	0.8	23.9	14.1506
Chhota Shigri	Glacier	India	AAR			31	31	74	29						41.25	4	0.4	16.5	20.5593
Ciardoney	Glacier	Italy	AAR	75	30	0	0	0	0	0	0	15	10		13	10	1	13	444.398
Columbia (2057)	Glacier	US	AAR	20	86	23	12	6	40	60	86	37	63		43.3	10	1	43.3	84.9946
Daniels	Glacier	US	AAR	13	64	21	22	18	34	62	76	28	60		39.8	10	1	39.8	32.7099
Devon NW	Ice cap	Canada	AAR	18	60	40	65	34	28	24	16	15	22		32.2	10	1	32.2	3.53721
Djankuat	Glacier	Russia	AAR	43	43	43	43	43	42	16					39	7	0.7	27.3	16.9393
Dyngjujokull	Ice cap outlet	Iceland	AAR					37					22		29.5	2	0.2	5.9	4.19665
Easton	Glacier	US	AAR	44	74	46	50	38	50	70	74	38	77		56.1	10	1	56.1	484.848
Emmons	Glacier	US	AAR			11			40	51	36				34.5	4	0.4	13.8	0.0703093
Engabreen	Ice cap	Norway	AAR	0	54	55	83	80	26	84	77	63	47		56.9	10	1	56.9	520.718
Eyjabakkajokull	Ice cap	Iceland	AAR	60	47	39	37	25	36	47	39	42	18		39	10	1	39	24.1991
Filleck K.	Glacier	Austria	AAR
Findelen	Glacier	Switz.	AAR					62	40	62	61				56.25	4	0.4	22.5	196.59
Fontana Bianca	Glacier	Italy	AAR	95	10	0	0	0	0	0	0	9			12.6667	9	0.9	11.4	412.707
Foss	Glacier	US	AAR	10	70	25	10	0	36	54	72	12	62		35.1	10	1	35.1	1.03888
Garabashi	Glacier	Russia	AAR	42	67	61	66	66	40	42	50	52			54	9	0.9	48.6	357.099
Goldbergkees	Glacier	Austria	AAR	18	20	0	52	51	7	24	20	21	27		24	10	1	24	101.621
Golubin	Glacier	Kirgizstan	AAR
Graafjellsbrea	Glacier	Norway	AAR			0	24	67	0	80	56	31	0		32.25	8	0.8	25.8	2.68131
Graasubreen	Glacier	Norway	AAR	45	0	0	7	13	0	1		7	4		8.55556	9	0.9	7.7	586.382
Gries	Glacier	Switz.	AAR	48	20	0	2	1	2	2	5	3	11		9.4	10	1	9.4	609.139
Gulkana	Glacier	US (Alaska)	AAR	57	51	66	48	56	64	53	66	56	43		56	10	1	56	480.454
Hamtah	Glacier	India	AAR	8	11	11	7		12						9.8	5	0.5	4.9	294.777
Hansbreen	Ice cap	Norway (Spitsbergen)	AAR	0	25	25	25	65	61	54	60	25	39		37.9	10	1	37.9	14.5867
Hansebreen	Glacier	Norway	AAR	0	0	0	31	53	0	89	64	0	0		23.7	10	1	23.7	107.76
Hardangerjokulen	Ice cap	Norway	AAR	42	47	0	75	84	0	85	82	79	0		49.4	10	1	49.4	234.68
Hellstugubreen	Glacier	Norway	AAR	48	7	0	23	39	0	25	57	42	0		24.1	10	1	24.1	99.6153
Helm	Glacier	Canada	AAR	23			0	0	0	12	2	12			7	7	0.7	4.9	513.357
Hidden	Glacier	Canada	AAR
Hintereisferner	Glacier	Austria	AAR	64	51	3	32	29	11	0	22	25	25		26.2	10	1	26.2	62.1062
Hoegtuvbreen	Glacier	Norway	AAR
Hofsjokull E (Thjorsarjokull)	Ice cap outlet	Iceland	AAR	30	43	35	37	54	46	44	46	50			42.7778	9	0.9	38.5	68.0745
Hofsjokull N (Satujokull)	Ice cap outlet	Iceland	AAR	40	38	33	30	42	41	51	38	49			40.2222	9	0.9	36.2	33.9459
Hofsjokull SW (Blagnipujokull)	Ice cap	Iceland	AAR	20	51	47	24	51	50	45	46	54			43.1111	9	0.9	38.8	73.3927
Hurd	Glacier	Antarctica	AAR		36	11	54	41	20	22	69	34	77		40.4444	9	0.9	36.4	36.447
Ice Worm	Glacier	US	AAR	0	72	0	0	0	20	48	60	35	60		29.5	10	1	29.5	20.9832
IGAN	Glacier	Russia	AAR
Irenebreen	Glacier	Norway (Spitsbergen)	AAR		29	25	27	10	24	20	31	6			21.5	8	0.8	17.2	126.62
Ivory	Glacier	New Zealand	AAR
Jamtalferner	Glacier	Austria	AAR	61	28	0	40	15	8	6	9	10	9		18.6	10	1	18.6	239.654
Johnsons	Glacier	Antarctica	AAR		55	39	66	76	43	42	67	37	93		57.5556	9	0.9	51.8	495.96
Jostefonn	Glacier	Norway	AAR
Karsojietna	Glacier	Sweden	AAR
Kesselwandferner	Glacier	Austria	AAR	87	75	0	61	66	33	22	42	28	26		44	10	1	44	98.3916
Kleinfleisskees	Glacier	Austria	AAR	51	13	0	75	63	10	23	24	26	48		33.3	10	1	33.3	0.609566
Koeldukvislarj kull	Ice cap	Iceland	AAR	47	56	52	46	46	54	59	51	57	8		47.6	10	1	47.6	182.77
Kongsvegen	Ice cap	Norway (Spitsbergen)	AAR	13	31	25	5	19	46	39	67	40	52		33.7	10	1	33.7	0.144968
Koryto	Glacier	Russia	AAR
Kozelskiy	Glacier	Russia	AAR
La Conejera	Glacier	Colombia	AAR						1	8	73	4	2		17.6	5	0.5	8.8	135.808
Langfjordjokelen	Glacier	Norway	AAR	0	0	0	0	28	0	42	53	0	12		13.5	10	1	13.5	423.567
Langjokull S. Dome	Ice cap	Iceland	AAR	28	28	23	33	41	41	27	28	50	0		29.9	10	1	29.9	17.4786
Lemon Creek	Glacier	US (Alaska)	AAR	77	67	5	59	61	68	72	80	64	50		60.3	10	1	60.3	687.449
Leviy Aktru	Glacier	Russia	AAR	58	56	56	57	62	58	57		67			58.875	8	0.8	47.1	491.804
Limmern	Glacier	Switz.	AAR
Lower Curtis	Glacier	US	AAR	25	68	35	30	20	40	60	66	20	58		42.2	10	1	42.2	65.9223
Lynch	Glacier	US	AAR	25	65	38	20	15	42	70	76	25	56		43.2	10	1	43.2	83.1608
Maarmaglaciaren	Glacier	Sweden	AAR	24	15	6	14	15	11	13	43	15	18		17.4	10	1	17.4	278.247
Maladeta	Glacier	Spain	AAR	69	10	0	0	0	51	53	34	0	80		29.7	10	1	29.7	19.1909
Malavalle	Glacier	Italy	AAR		39	26	47	37	12	9	9	36	42		28.5556	9	0.9	25.7	27.475
Maliy Aktru	Glacier	Russia	AAR	61	50	53	63	72	60	55		82			62	8	0.8	49.6	623.588
Martial Este	Glacier	Argentina	AAR	100	0	40	0	13	38	62	56	51			40	9	0.9	36	31.5338
Marukh	Glacier	Russia	AAR
McCall	Glacier	US (Alaska)	AAR
Midtre Lovenbreen	Glacier	Norway (Spitsbergen)	AAR	18			0	5	14	26	38	29	29		19.875	8	0.8	15.9	161.443
Minaret	Glacier	Canada	AAR
Mittivakkat	Glacier	Greenland	AAR	0	41	75	5	0	18	0	41	18	0		19.8	10	1	19.8	203.94
Mutnovskiy NE	Glacier	Russia	AAR
Mutnovskiy SW	Glacier	Russia	AAR
Nigardsbreen	Ice cap	Norway	AAR	64	25	0	70	87	4	91	91	80	14		52.6	10	1	52.6	342.963
No. 125 (Vodopadniy)	Glacier	Russia	AAR	69	66	64	66	71	67	67		85			69.375	8	0.8	55.5	996.547
No. 104	Glacier	Russia	AAR
No. 356	Glacier	Russia	AAR
Noisy Creek	Glacier	US	AAR	0	83	0	0	0	0	1	20	0	30		13.4	10	1	13.4	427.693
North Klawatti	Glacier	US	AAR	0	72	0	19	3	19	50	70	0	70		30.3	10	1	30.3	14.294
Obrucheva	Glacier	Russia	AAR
Ochsentaler	Glacier	Switz.	AAR
Pendente	Glacier	Italy	AAR	61	0	0	9	2	0	0	0	7	24		10.3	10	1	10.3	565.524
Peyto	Glacier	Canada	AAR	26	37	0	29	21	10	40	41	18			24.6667	9	0.9	22.2	79.7624
Place	Glacier	Canada	AAR	22			0	1	0	26	40	5			13.4286	7	0.7	9.4	298.559
Plattalva	Glacier	Switz.	AAR
Praviy Aktru	Glacier	Russia	AAR
Rabots Glaciar	Glacier	Sweden	AAR	12	14	1			19		43	36	13		19.7143	7	0.7	13.8	144.477
Rainbow	Glacier	US	AAR	42	68	50	45	38	46	76	80	36	80		56.1	10	1	56.1	484.848
Ram River	Glacier	Canada	AAR
Rhone	Glacier	Switz.	AAR
Riukojietna	Ice cap	Sweden	AAR		0	0			0	0	0	2	0		0.285714	7	0.7	0.2	799.473
Sandalee	Glacier	US	AAR	0	9	0	0	0	4	6	40	0	66		12.5	10	1	12.5	465.729
Sary-Tor	Glacier	Kirgizstan	AAR
Sentinel	Glacier	Canada	AAR
Sforzellina	Glacier	Italy	AAR
Shaune Garang	Glacier	India	AAR
Sholes	Glacier	US	AAR	26	65	35	25	15	45	72	75	15	84		45.7	10	1	45.7	135.007
Shumskiy	Glacier	Russia	AAR
Silver	Glacier	US	AAR	67	54	37	14	8	6	8	40	13	88		33.5	10	1	33.5	0.337267
Silvretta	Glacier	Switz.	AAR	71	57	0	53	26	2	21	31	6	44		31.1	10	1	31.1	8.88485
Sonnblickkees	Glacier	Austria	AAR	40	35	1	62	44	29	2	23	48	23		30.7	10	1	30.7	11.4294
South Cascade	Glacier	US	AAR	0	84	7	5	5	10	60	32	0			22.5556	9	0.9	20.3	119.547
Spoerteggbreen	Glacier	Norway	AAR
Storbreen	Glacier	Norway	AAR	24	0	2	22	43	0	30	51	53	4		22.9	10	1	22.9	125.009
Storglaciaren	Glacier	Sweden	AAR	30	37	29	40	43	17	50	53	37	28		36.4	10	1	36.4	5.37894
Storglombreen	Glacier	Norway	AAR	0	0	0	78	79							31.4	5	0.5	15.7	3.5932
Storsteinsfjellbreen	Glacier	Norway	AAR
Superguksoak	Glacier	Canada	AAR
Suyok Zapadniy	Glacier	Russia	AAR
Svartisheibreen	Glacier	Norway	AAR
Tarfalaglaciaren	Glacier	Sweden	AAR				23	0.7	0	73	30		0		21.1167	6	0.6	12.67	100.84
Trollbergdalsbreen	Glacier	Norway	AAR
Ts. Tuyuksuyskiy	Glacier	Russia	AAR	38	35	52	42	48	22	34	22	66	55		41.4	10	1	41.4	53.5715
Tungnaarjokull	Ice cap	Iceland	AAR	44	35	45	40	38	41	40	37	48	0		36.8	10	1	36.8	7.39434
Urumqihe S. No. 1	Glacier	China	AAR	39.5	36.5	48.5	41	51	31	32	17	64	0		36.05	10	1	36.05	3.87796
Vermuntglacier	Glacier	Austria	AAR
Vernagtferner	Glacier	Austria	AAR	47	53	0	34	40	25	19	17	14	23		27.2	10	1	27.2	47.3447
Waldemarbreen	Glacier	Norway (Spitsbergen)	AAR	1	20	14	21	15	16	13	31	16			16.3333	9	0.9	14.7	283.474
Watson	Glacier	US	AAR
White	Glacier	Canada	AAR	51	80	58	75	33	61	25	21	29	58		49.1	10	1	49.1	225.578
Wolverine	Glacier	US (Alaska)	AAR	73	62	64	37	46	62	62	78	46			58.8889	9	0.9	53	553.9
Woolsey	Glacier	Canada	AAR
Wurtenkees	Glacier	Austria	AAR	33	4	3	28	16	17	4	15	33	20		17.3	10	1	17.3	281.593
Xiaodongkemadi	Glacier	China	AAR
Yawning	Glacier	US	AAR	20	77	10	20	15	54	70	70	30	70		43.6	10	1	43.6	90.6162
Yuri	Glacier	Canada	AAR
Zavisha	Glacier	Canada	AAR
Zongo	Glacier	Bolivia	AAR	75	64	76	48	37	71	64	77	55	64		63.1	10	1	63.1	842.117
Number of observations				81	82	87	89	91	93	90	86	87	71			Nf	85.7	2920.72	20777.5
Mean				36.1296	39.2256	22.546	32.9888	33.9747	26.7312	39.1778	45.1279	32.8621	32.7183				Mean	34.0807	15.6623
Std deviation				26.5113	25.7248	23.156	24.3317	26.2369	23.3276	27.0237	25.8169	23.1944	28.1822					Std error	3.31604	(95% confidence interval)
Std error				2.9457	2.84083	2.48259	2.57916	2.75038	2.41896	2.84855	2.78391	2.4867	3.34461
Glaciers (pA calc.)
Name	Glacier/ice cap	Country	Data to right	2001	2002	2003	2004	2005	2006	2007	2008	2009	2010		Mean alpha 2001-10	Count Mn	f	Weighted alpha		Variance calc.
n=125
Abramov	Glacier	Kirgizstan	Alpha
Alexander	Glacier	Canada	Alpha
Andrei	Glacier	Canada	Alpha
Antizana15Alpha	Glacier	Equador	Alpha	0.843289	0.702741	0.590302	0.78707	0.773015	0.75896	0.744905	1.19466	0.75896	0.75896		0.791286	10	1	0.791286		0.0514895
Austre Broggerbreen	Glacier	Norway (Spitsbergen)	Alpha	0.1413			0	0	0.100929	0.201857	0.504643	0.322971	0.262414		0.191764	8	0.8	0.153411		0.11107
Baby	Glacier	Canada	Alpha
Bahia Del Diablo	Glacier	Antarctica	Alpha	1.04102	0.62461	0.832813	0.916094	0.791172	0.853633	1.0202	0.687071	0.895274			0.85132	9	0.9	0.766188		0.0741046
Basodino	Glacier	Switz.	Alpha	1.49049	0.941361	0	0.647186	0.0980584	0	0.0980584	0.0392234	1.37282	0.588351		0.527554	10	1	0.527554		0.00135561
Bench	Glacier	Canada	Alpha
Blue	Glacier	US	Alpha
Bondhusbreen	Glacier	Norway	Alpha
Breidalblikkbrea	Glacier	Norway	Alpha			0	0.311584	0.879765	0	1.28299	0.806452	0.549853	0		0.478831	8	0.8	0.383065		0.00585399
Brewster	Glacier	New Zealand	Alpha					1.53981	1.25984	1.17235	0.174978	0.454943			0.920385	5	0.5	0.460192		0.0633723
Calderone	Glacier	Italy	Alpha	0.469083	0	0.447761	2.1322	0.447761	2.1322	0	1.59915	1.83369	1.79104		1.08529	10	1	1.08529		0.271352
Careser	Glacier	Italy	Alpha	0.288948	0.024079	0	0	0	0	0	0	0.024079	0.24079		0.0577895	10	1	0.0577895		0.256627
Charquini Sur	Glacier	Bolivia	Alpha			0.449827	0.0692042	0	0.67474	0.657439	1.609	0.50173	0.17301		0.516869	8	0.8	0.413495		0.00180534
Chhota Shigri	Glacier	India	Alpha			0.446236	0.446236	1.06521	0.417446						0.593781	4	0.4	0.237513		0.000345944
Ciardoney	Glacier	Italy	Alpha	1.38837	0.55535	0	0	0	0	0	0	0.277675	0.185117		0.240652	10	1	0.240652		0.104796
Columbia (2057)	Glacier	US	Alpha	0.310511	1.3352	0.357087	0.186306	0.0931532	0.621022	0.931532	1.3352	0.574445	0.978109		0.672256	10	1	0.672256		0.0116387
Daniels	Glacier	US	Alpha	0.221164	1.08881	0.357264	0.374277	0.306227	0.578428	1.05478	1.29296	0.476353	1.02076		0.677101	10	1	0.677101		0.0127076
Djankuat	Glacier	Russia	Alpha	0.773799	0.773799	0.773799	0.773799	0.773799	0.755803	0.287925					0.701818	7	0.7	0.491272		0.0132237
Easton	Glacier	US	Alpha	0.680798	1.14498	0.711744	0.773635	0.587962	0.773635	1.08309	1.14498	0.587962	1.1914		0.868018	10	1	0.868018		0.0922003
Emmons	Glacier	US	Alpha			0.210728			0.766284	0.977011	0.689655				0.66092	4	0.4	0.264368		0.00372849
Filleck K.	Glacier	Austria	Alpha
Findelen	Glacier	Switz.	Alpha					0.927588	0.598444	0.927588	0.912627				0.841562	4	0.4	0.336625		0.0307335
Fontana Bianca	Glacier	Italy	Alpha	1.75926	0.185185	0	0	0	0	0	0	0.166667			0.234568	9	0.9	0.211111		0.0978943
Foss	Glacier	US	Alpha	0.151492	1.06045	0.37873	0.151492	0	0.545372	0.818058	1.09074	0.181791	0.939252		0.531738	10	1	0.531738		0.00106507
Garabashi	Glacier	Russia	Alpha	0.697906	1.11333	1.01363	1.09671	1.09671	0.664673	0.697906	0.830841	0.864074			0.897308	9	0.9	0.807577		0.0997612
Goldbergkees	Glacier	Austria	Alpha	0.435624	0.484027	0	1.25847	1.23427	0.169409	0.580833	0.484027	0.508228	0.653437		0.580833	10	1	0.580833		0.000270916
Golubin	Glacier	Kirgizstan	Alpha
Graafjellsbrea	Glacier	Norway	Alpha			0	0.421941	1.17792	0	1.40647	0.984529	0.545007	0		0.566983	8	0.8	0.453586		5.45022e-06
Graasubreen	Glacier	Norway	Alpha	1.30435	0	0	0.202899	0.376812	0	0.0289855		0.202899	0.115942		0.247987	9	0.9	0.223188		0.09009
Gries	Glacier	Switz.	Alpha	0.880572	0.366905	0	0.0366905	0.0183453	0.0366905	0.0366905	0.0917263	0.0550358	0.201798		0.172445	10	1	0.172445		0.153607
Gulkana	Glacier	US (Alaska)	Alpha	0.882353	0.789474	1.02167	0.743034	0.866873	0.990712	0.820433	1.02167	0.866873	0.665635		0.866873	10	1	0.866873		0.0915063
Hamtah	Glacier	India	Alpha	0.387409	0.532688	0.532688	0.338983		0.581114						0.474576	5	0.5	0.237288		0.00403173
Hansebreen	Glacier	Norway	Alpha	0	0	0	0.550817	0.94172	0	1.58138	1.13717	0	0		0.421109	10	1	0.421109		0.0205246
Hellstugubreen	Glacier	Norway	Alpha	0.815633	0.118946	0	0.390824	0.662702	0	0.424809	0.968564	0.713679	0		0.409516	10	1	0.409516		0.0239808
Helm	Glacier	Canada	Alpha	0.637472			0	0	0	0.332594	0.0554324	0.332594			0.194013	7	0.7	0.135809		0.0960164
Hidden	Glacier	Canada	Alpha
Hintereisferner	Glacier	Austria	Alpha	0.981144	0.781849	0.0459911	0.490572	0.444581	0.168634	0	0.337268	0.383259	0.383259		0.401656	10	1	0.401656		0.0264769
Hoegtuvbreen	Glacier	Norway	Alpha
Hurd	Glacier	Antarctica	Alpha		0.677074	0.206884	1.01561	0.771112	0.376152	0.413767	1.29772	0.639458	1.44819		0.760663	9	0.9	0.684597		0.0346767
Ice Worm	Glacier	US	Alpha	0	1.1557	0	0	0	0.321027	0.770465	0.963082	0.561798	0.963082		0.473515	10	1	0.473515		0.00825513
IGAN	Glacier	Russia	Alpha
Irenebreen	Glacier	Norway (Spitsbergen)	Alpha		0.696613	0.600528	0.648571	0.240211	0.576507	0.480423	0.744655	0.144127			0.516454	8	0.8	0.413164		0.00183695
Ivory	Glacier	New Zealand	Alpha
Jamtalferner	Glacier	Austria	Alpha	1.06494	0.488827	0	0.698324	0.261872	0.139665	0.104749	0.157123	0.174581	0.157123		0.324721	10	1	0.324721		0.0574332
Johnsons	Glacier	Antarctica	Alpha		1.01664	0.720887	1.21996	1.40481	0.794824	0.77634	1.23845	0.683919	1.71904		1.06387	9	0.9	0.957486		0.224551
Jostefonn	Glacier	Norway	Alpha
Karsojietna	Glacier	Sweden	Alpha
Kesselwandferner	Glacier	Austria	Alpha	1.27249	1.09697	0	0.892204	0.965336	0.482668	0.321779	0.614305	0.409536	0.380284		0.643557	10	1	0.643557		0.00627013
Kleinfleisskees	Glacier	Austria	Alpha	0.816	0.208	0	1.2	1.008	0.16	0.368	0.384	0.416	0.768		0.5328	10	1	0.5328		0.000996854
Koryto	Glacier	Russia	Alpha
Kozelskiy	Glacier	Russia	Alpha
La Conejera	Glacier	Colombia	Alpha						0.025208	0.201664	1.84018	0.100832	0.0504159		0.44366	5	0.5	0.22183		0.00728579
Langfjordjokelen	Glacier	Norway	Alpha	0	0	0	0	0.44843	0	0.672646	0.848815	0	0.192184		0.216208	10	1	0.216208		0.121219
Lemon Creek	Glacier	US (Alaska)	Alpha	1.15373	1.0039	0.0749176	0.884028	0.913995	1.01888	1.07881	1.19868	0.958945	0.749176		0.903506	10	1	0.903506		0.115011
Leviy Aktru	Glacier	Russia	Alpha	0.950041	0.917281	0.917281	0.933661	1.01556	0.950041	0.933661		1.09746			0.964373	8	0.8	0.771499		0.128
Limmern	Glacier	Switz.	Alpha
Lower Curtis	Glacier	US	Alpha	0.39847	1.08384	0.557858	0.478164	0.318776	0.637552	0.956328	1.05196	0.318776	0.92445		0.672617	10	1	0.672617		0.0117168
Lynch	Glacier	US	Alpha	0.379881	0.987692	0.57742	0.303905	0.227929	0.638201	1.06367	1.15484	0.379881	0.850935		0.656435	10	1	0.656435		0.00847545
Maarmaglaciaren	Glacier	Sweden	Alpha	0.733272	0.458295	0.183318	0.427742	0.458295	0.336083	0.397189	1.31378	0.458295	0.549954		0.531622	10	1	0.531622		0.0010726
Maladeta	Glacier	Spain	Alpha	1.57931	0.228885	0	0	0	1.16732	1.21309	0.77821	0	1.83108		0.679789	10	1	0.679789		0.013321
Malavalle	Glacier	Italy	Alpha		0.768927	0.512618	0.926656	0.729495	0.236593	0.177445	0.177445	0.709779	0.828076		0.563004	9	0.9	0.506703		1.68709e-06
Maliy Aktru	Glacier	Russia	Alpha	0.892074	0.731208	0.77508	0.921322	1.05294	0.87745	0.804329		1.19918			0.906698	8	0.8	0.725358		0.0937491
Martial Este	Glacier	Argentina	Alpha	1.78253	0	0.713012	0	0.231729	0.677362	1.10517	0.998217	0.909091			0.713012	9	0.9			0.0198843
Marukh	Glacier	Russia	Alpha
McCall	Glacier	US (Alaska)	Alpha
Midtre Lovenbreen	Glacier	Norway (Spitsbergen)	Alpha	0.331553			0	0.092098	0.257874	0.47891	0.699945	0.534168	0.534168		0.36609	8	0.8	0.292872		0.0314531
Minaret	Glacier	Canada	Alpha
Mittivakkat	Glacier	Greenland	Alpha	0	0.707262	1.29377	0.0862515	0	0.310505	0	0.707262	0.310505	0		0.341556	10	1	0.341556		0.0496474
Mutnovskiy NE	Glacier	Russia	Alpha
Mutnovskiy SW	Glacier	Russia	Alpha
No. 125 (Vodopadniy)	Glacier	Russia	Alpha	1.00818	0.964348	0.935126	0.964348	1.03741	0.97896	0.97896		1.24196			1.01366	8	0.8	0.810929		0.161488
No. 104	Glacier	Russia	Alpha
No. 356	Glacier	Russia	Alpha
Noisy Creek	Glacier	US	Alpha	0	1.55986	0	0	0	0	0.0187935	0.375869	0	0.563804		0.251832	10	1	0.251832		0.0976816
North Klawatti	Glacier	US	Alpha	0	1.20724	0	0.318578	0.0503018	0.318578	0.838364	1.17371	0	1.17371		0.508048	10	1	0.508048		0.00317247
Obrucheva	Glacier	Russia	Alpha
Ochsentaler	Glacier	Switz.	Alpha
Pendente	Glacier	Italy	Alpha	1.46811	0	0	0.216606	0.0481348	0	0	0	0.168472	0.577617		0.247894	10	1	0.247894		0.100159
Peyto	Glacier	Canada	Alpha	0.564726	0.803649	0	0.629887	0.456125	0.217202	0.86881	0.89053	0.390964			0.535766	9	0.9	0.482189		0.000736524
Place	Glacier	Canada	Alpha	0.448888			0	0.020404	0	0.530504	0.81616	0.10202			0.273997	7	0.7	0.191798		0.0590229
Plattalva	Glacier	Switz.	Alpha
Praviy Aktru	Glacier	Russia	Alpha
Rabots Glaciar	Glacier	Sweden	Alpha	0.24326	0.283803	0.0202716			0.385161		0.871681	0.729779	0.263531		0.399641	7	0.7	0.279749		0.0189957
Rainbow	Glacier	US	Alpha	0.634058	1.02657	0.754831	0.679348	0.573671	0.694444	1.14734	1.20773	0.543478	1.20773		0.84692	10	1	0.84692		0.079833
Ram River	Glacier	Canada	Alpha
Rhone	Glacier	Switz.	Alpha
Sandalee	Glacier	US	Alpha	0	0.252171	0	0	0	0.112076	0.168114	1.12076	0	1.84926		0.350238	10	1	0.350238		0.0458537
Sary-Tor	Glacier	Kirgizstan	Alpha
Sentinel	Glacier	Canada	Alpha
Sforzellina	Glacier	Italy	Alpha
Shaune Garang	Glacier	India	Alpha
Sholes	Glacier	US	Alpha	0.411914	1.02978	0.554499	0.396071	0.237643	0.712928	1.14068	1.18821	0.237643	1.3308		0.724018	10	1	0.724018		0.0254864
Shumskiy	Glacier	Russia	Alpha
Silver	Glacier	US	Alpha	1.41112	1.13732	0.779275	0.294861	0.168492	0.126369	0.168492	0.84246	0.273799	1.85341		0.70556	10	1	0.70556		0.0199338
Silvretta	Glacier	Switz.	Alpha	1.28228	1.02944	0	0.957197	0.469568	0.0361206	0.379267	0.55987	0.108362	0.794654		0.561676	10	1	0.561676		7.27379e-06
Sonnblickkees	Glacier	Austria	Alpha	0.673741	0.589523	0.0168435	1.0443	0.741115	0.488462	0.033687	0.387401	0.808489	0.387401		0.517096	10	1	0.517096		0.0022351
South Cascade	Glacier	US	Alpha	0	1.59121	0.132601	0.0947149	0.0947149	0.18943	1.13658	0.606175	0			0.427269	9	0.9	0.384543		0.0169176
Spoerteggbreen	Glacier	Norway	Alpha
Storbreen	Glacier	Norway	Alpha	0.426743	0	0.0355619	0.391181	0.76458	0	0.533428	0.906828	0.94239	0.0711238		0.407183	10	1	0.407183		0.0247085
Storglaciaren	Glacier	Sweden	Alpha	0.663864	0.818765	0.641735	0.885152	0.951538	0.376189	1.10644	1.17283	0.818765	0.619606		0.805488	10	1	0.805488		0.0581364
Storglombreen	Glacier	Norway	Alpha	0	0	0	1.22219	1.23786							0.492009	5	0.5	0.246004		0.00261829
Storsteinsfjellbreen	Glacier	Norway	Alpha
Superguksoak	Glacier	Canada	Alpha
Suyok Zapadniy	Glacier	Russia	Alpha
Svartisheibreen	Glacier	Norway	Alpha
Tarfalaglaciaren	Glacier	Sweden	Alpha				0.425532	0.012951	0	1.3506	0.555042		0		0.390688	6	0.6	0.234413		0.0181
Trollbergdalsbreen	Glacier	Norway	Alpha
Ts. Tuyuksuyskiy	Glacier	Russia	Alpha	0.741319	0.682794	1.01444	0.819352	0.936403	0.429185	0.663285	0.429185	1.28755	1.07296		0.807647	10	1	0.807647		0.0591824
Urumqihe S. No. 1	Glacier	China	Alpha	0.709921	0.656003	0.871675	0.73688	0.916607	0.557153	0.575126	0.305536	1.15025	0		0.647915	10	1	0.647915		0.0069793
Vermuntglacier	Glacier	Austria	Alpha
Vernagtferner	Glacier	Austria	Alpha	0.704753	0.794722	0	0.509822	0.59979	0.374869	0.2849	0.254911	0.209927	0.344879		0.407857	10	1	0.407857		0.0244972
Waldemarbreen	Glacier	Norway (Spitsbergen)	Alpha	0.0213904	0.427807	0.299465	0.449198	0.320856	0.342246	0.278075	0.663102	0.342246			0.349376	9	0.9	0.314439		0.0416013
Watson	Glacier	US	Alpha
White	Glacier	Canada	Alpha	0.711	1.11529	0.808588	1.04559	0.460059	0.850411	0.348529	0.292765	0.404294	0.808588		0.684511	10	1	0.684511		0.0144332
Wolverine	Glacier	US (Alaska)	Alpha	1.10489	0.938399	0.96867	0.560012	0.696231	0.938399	0.938399	1.18057	0.696231			0.891311	9	0.9	0.80218		0.0961994
Woolsey	Glacier	Canada	Alpha
Wurtenkees	Glacier	Austria	Alpha	0.915141	0.110926	0.0831947	0.776484	0.443705	0.471436	0.110926	0.415973	0.915141	0.554631		0.479756	10	1	0.479756		0.230166
Xiaodongkemadi	Glacier	China	Alpha
Yawning	Glacier	US	Alpha	0.307361	1.18334	0.153681	0.307361	0.230521	0.829876	1.07576	1.07576	0.461042	1.07576		0.670048	10	1	0.670048		0.0111671
Yuri	Glacier	Canada	Alpha
Zavisha	Glacier	Canada	Alpha
Zongo	Glacier	Bolivia	Alpha	1.09043	0.930503	1.10497	0.697877	0.537947	1.03228	0.930503	1.11951	0.799651	0.930503		0.917418	10	1	0.917418		0.124641
Number of observations				64	64	69	72	73	76	73	69	70	56		0.564373		68.6	38.716		4.09045
Mean				0.679365	0.687255	0.354772	0.529985	0.510283	0.445969	0.617697	0.776432	0.515567	0.670989					Mean	-0.435627	0.245987
Std deviation				0.482642	0.426444	0.381012	0.42589	0.422301	0.401729	0.433424	0.441978	0.390289	0.533136						Std error	0.0582111	(95% confidence interval)
Std error				0.0603302	0.0533055	0.0458684	0.0501917	0.0494266	0.0460815	0.0507285	0.0532079	0.0466484	0.0712433
Ice caps (pA calc.)
Name	Glacier/ice cap	Country	Data to right	2001	2002	2003	2004	2005	2006	2007	2008	2009	2010		Mean alpha 2001-10	Count Mn	f	Weighted alpha		Variance calc.
n=19
Aalfotbreen	Ice cap outlet	Norway	Alpha	0	0	0	0.942893	1.38765	0	1.72567	1.40544	0.853941	0		0.63156	10	1	0.63156		0.00213034
Austdalsbreen	Ice cap	Norway	Alpha	0	0	0	0.696864	1.18164	0	1.13619	1.07559	0.848356	0		0.493865	10	1	0.493865		0.0338013
Breidamjok. E.B.	Ice cap	Iceland	Alpha	0.685484	0.712366	0.806452	0.672043	0.510753							0.677419	5	0.5	0.33871		4.39508e-08
Bruarjokull	Ice cap	Iceland	Alpha	1.06831	0.955002	0.841696	0.793137	0.388475	0.809323	0.874069	0.82551	0.955002	0.226611		0.773713	10	1	0.773713		0.00921549
Devon NW	Ice cap	Canada	Alpha	0.291215	0.970717	0.647144	1.05161	0.550073	0.453001	0.388287	0.258858	0.2438	0.3576		0.52123	10	1	0.52123		0.0244877
Dyngjujokull	Ice cap outlet	Iceland	Alpha					0.608153					0.361604		0.484878	2	0.2	0.0969757		0.00743726
Engabreen	Ice cap	Norway	Alpha	0	0.902859	0.919579	1.38773	1.33757	0.43471	1.40445	1.28741	1.05334	0.785822		0.951346	10	1	0.951346		0.0748734
Eyjabakkajokull	Ice cap	Iceland	Alpha	1.07411	0.841389	0.698174	0.66237	0.447547	0.644468	0.841389	0.698174	0.75188	0.322234		0.698174	10	1	0.698174		0.000418537
Hansbreen	Ice cap	Norway (Spitsbergen)	Alpha	0	0.467814	0.467814	0.467814	1.21632	1.14147	1.01048	1.12275	0.467814	0.72979		0.709207	10	1	0.709207		0.000991667
Hardangerjokulen	Ice cap	Norway	Alpha	0.566114	0.633509	0	1.01092	1.13223	0	1.14571	1.10527	1.06483	0		0.665858	10	1	0.665858		0.00014061
Hofsjokull E (Thjorsarjokull)	Ice cap outlet	Iceland	Alpha	0.564016	0.808423	0.658018	0.695619	1.01523	0.864824	0.827223	0.864824	0.940026			0.804245	9	0.9	0.72382		0.0144086
Hofsjokull N (Satujokull)	Ice cap outlet	Iceland	Alpha	0.797925	0.758029	0.658288	0.598444	0.837822	0.817874	1.01735	0.758029	0.977459			0.802358	9	0.9	0.722122		0.0139822
Hofsjokull SW (Blagnipujokull)	Ice cap	Iceland	Alpha	0.409165	1.04337	0.961538	0.490998	1.04337	1.02291	0.920622	0.94108	1.10475			0.881979	9	0.9	0.793781		0.0375509
Koeldukvislarj kull	Ice cap	Iceland	Alpha	0.763731	0.909977	0.844979	0.747481	0.747481	0.877478	0.958726	0.828729	0.926227	0.129997		0.773481	10	1	0.773481		0.0091709
Kongsvegen	Ice cap	Norway (Spitsbergen)	Alpha	0.269207	0.641955	0.517706	0.103541	0.393456	0.952578	0.807621	1.38745	0.828329	1.07683		0.697867	10	1	0.697867		0.000406072
Langjokull S. Dome	Ice cap	Iceland	Alpha	0.496894	0.496894	0.408163	0.585626	0.727595	0.727595	0.479148	0.496894	0.887311	0		0.530612	10	1	0.530612		0.0216395
Nigardsbreen	Ice cap	Norway	Alpha	1.0528	0.411252	0	1.15151	1.43116	0.0658003	1.49696	1.49696	1.31601	0.230301		0.865274	10	1	0.865274		0.035178
Riukojietna	Ice cap	Sweden	Alpha		0	0			0	0	0	0.0365163	0		0.00521662	7	0.7	0.00365163		0.316579
Tungnaarjokull	Ice cap	Iceland	Alpha	0.714634	0.568459	0.730875	0.649667	0.617184	0.665909	0.649667	0.600942	0.7796	0		0.597694	10	1	0.597694		0.00640355
Number of observations				17	18	18	17	18	17	17	17	17	15		0.677716		17.1	11.5889		0.608815
Mean				0.514918	0.61789	0.508913	0.747545	0.865206	0.557526	0.922562	0.891407	0.825599	0.281386				Mean	-0.322284		0.19446
Std deviation				0.379701	0.336854	0.354911	0.296873	0.357745	0.40319	0.415292	0.408373	0.315474	0.33867						Std error	0.0921696	(95% confidence interval)
Std error				0.0920909	0.0793972	0.0836533	0.0720022	0.0843212	0.097788	0.100723	0.099045	0.0765137	0.0874441
Glaciers (pV calc.)
Name	Glacier/ice cap	Country	Data to right	2001	2002	2003	2004	2005	2006	2007	2008	2009	2010		Mean alpha 2001-10	Count Mn	f	Weighted alpha^gamma		Variance calc.
n=125
Abramov	Glacier	Kirgizstan	Alpha
Alexander	Glacier	Canada	Alpha
Andrei	Glacier	Canada	Alpha
Antizana15Alpha	Glacier	Equador	Alpha	0.843289	0.702741	0.590302	0.78707	0.773015	0.75896	0.744905	1.19466	0.75896	0.75896		0.791286	10	1	0.727333		0.121301
Austre Broggerbreen	Glacier	Norway (Spitsbergen)	Alpha	0.1413			0	0	0.100929	0.201857	0.504643	0.322971	0.262414		0.191764	8	0.8	0.0846553		0.0597242
Baby	Glacier	Canada	Alpha
Bahia Del Diablo	Glacier	Antarctica	Alpha	1.04102	0.62461	0.832813	0.916094	0.791172	0.853633	1.0202	0.687071	0.895274			0.85132	9	0.9	0.72305		0.162057
Basodino	Glacier	Switz.	Alpha	1.49049	0.941361	0	0.647186	0.0980584	0	0.0980584	0.0392234	1.37282	0.588351		0.527554	10	1	0.419067		0.00160135
Bench	Glacier	Canada	Alpha
Blue	Glacier	US	Alpha
Bondhusbreen	Glacier	Norway	Alpha
Breidalblikkbrea	Glacier	Norway	Alpha			0	0.311584	0.879765	0	1.28299	0.806452	0.549853	0		0.478831	8	0.8	0.293858		0.000110033
Brewster	Glacier	New Zealand	Alpha					1.53981	1.25984	1.17235	0.174978	0.454943			0.920385	5	0.5	0.446651		0.132228
Calderone	Glacier	Italy	Alpha	0.469083	0	0.447761	2.1322	0.447761	2.1322	0	1.59915	1.83369	1.79104		1.08529	10	1	1.11774		0.545664
Careser	Glacier	Italy	Alpha	0.288948	0.024079	0	0	0	0	0	0	0.024079	0.24079		0.0577895	10	1	0.0207069		0.12841
Charquini Sur	Glacier	Bolivia	Alpha			0.449827	0.0692042	0	0.67474	0.657439	1.609	0.50173	0.17301		0.516869	8	0.8	0.326052		0.000650476
Chhota Shigri	Glacier	India	Alpha			0.446236	0.446236	1.06521	0.417446						0.593781	4	0.4	0.196876		0.00512019
Ciardoney	Glacier	Italy	Alpha	1.38837	0.55535	0	0	0	0	0	0	0.277675	0.185117		0.240652	10	1	0.144108		0.0551977
Columbia (2057)	Glacier	US	Alpha	0.310511	1.3352	0.357087	0.186306	0.0931532	0.621022	0.931532	1.3352	0.574445	0.978109		0.672256	10	1	0.582703		0.0414744
Daniels	Glacier	US	Alpha	0.221164	1.08881	0.357264	0.374277	0.306227	0.578428	1.05478	1.29296	0.476353	1.02076		0.677101	10	1	0.588422		0.0438365
Djankuat	Glacier	Russia	Alpha	0.773799	0.773799	0.773799	0.773799	0.773799	0.755803	0.287925					0.701818	7	0.7	0.432477		0.0399091
Easton	Glacier	US	Alpha	0.680798	1.14498	0.711744	0.773635	0.587962	0.773635	1.08309	1.14498	0.587962	1.1914		0.868018	10	1	0.824896		0.198778
Emmons	Glacier	US	Alpha			0.210728			0.766284	0.977011	0.689655				0.66092	4	0.4	0.227752		0.0144901
Filleck K.	Glacier	Austria	Alpha
Findelen	Glacier	Switz.	Alpha					0.927588	0.598444	0.927588	0.912627				0.841562	4	0.4	0.316357		0.0678454
Fontana Bianca	Glacier	Italy	Alpha	1.75926	0.185185	0	0	0	0	0	0	0.166667			0.234568	9	0.9	0.125259		0.0517855
Foss	Glacier	US	Alpha	0.151492	1.06045	0.37873	0.151492	0	0.545372	0.818058	1.09074	0.181791	0.939252		0.531738	10	1	0.423593		0.00198403
Garabashi	Glacier	Russia	Alpha	0.697906	1.11333	1.01363	1.09671	1.09671	0.664673	0.697906	0.830841	0.864074			0.897308	9	0.9	0.776682		0.210769
Goldbergkees	Glacier	Austria	Alpha	0.435624	0.484027	0	1.25847	1.23427	0.169409	0.580833	0.484027	0.508228	0.653437		0.580833	10	1	0.477649		0.00972181
Golubin	Glacier	Kirgizstan	Alpha
Graafjellsbrea	Glacier	Norway	Alpha			0	0.421941	1.17792	0	1.40647	0.984529	0.545007	0		0.566983	8	0.8	0.369782		0.00553471
Graasubreen	Glacier	Norway	Alpha	1.30435	0	0	0.202899	0.376812	0	0.0289855		0.202899	0.115942		0.247987	9	0.9	0.135103		0.0471703
Gries	Glacier	Switz.	Alpha	0.880572	0.366905	0	0.0366905	0.0183453	0.0366905	0.0366905	0.0917263	0.0550358	0.201798		0.172445	10	1	0.0915896		0.0826336
Gulkana	Glacier	US (Alaska)	Alpha	0.882353	0.789474	1.02167	0.743034	0.866873	0.990712	0.820433	1.02167	0.866873	0.665635		0.866873	10	1	0.823416		0.197461
Hamtah	Glacier	India	Alpha	0.387409	0.532688	0.532688	0.338983		0.581114						0.474576	5	0.5	0.181445		0.00013056
Hansebreen	Glacier	Norway	Alpha	0	0	0	0.550817	0.94172	0	1.58138	1.13717	0	0		0.421109	10	1	0.308444		0.00498525
Hellstugubreen	Glacier	Norway	Alpha	0.815633	0.118946	0	0.390824	0.662702	0	0.424809	0.968564	0.713679	0		0.409516	10	1	0.296953		0.00673992
Helm	Glacier	Canada	Alpha	0.637472			0	0	0	0.332594	0.0554324	0.332594			0.194013	7	0.7	0.0752573		0.0516137
Hidden	Glacier	Canada	Alpha
Hintereisferner	Glacier	Austria	Alpha	0.981144	0.781849	0.0459911	0.490572	0.444581	0.168634	0	0.337268	0.383259	0.383259		0.401656	10	1	0.289229		0.00806791
Hoegtuvbreen	Glacier	Norway	Alpha
Hurd	Glacier	Antarctica	Alpha		0.677074	0.206884	1.01561	0.771112	0.376152	0.413767	1.29772	0.639458	1.44819		0.760663	9	0.9	0.620389		0.0866411
Ice Worm	Glacier	US	Alpha	0	1.1557	0	0	0	0.321027	0.770465	0.963082	0.561798	0.963082		0.473515	10	1	0.361788		0.000297982
IGAN	Glacier	Russia	Alpha
Irenebreen	Glacier	Norway (Spitsbergen)	Alpha		0.696613	0.600528	0.648571	0.240211	0.576507	0.480423	0.744655	0.144127			0.516454	8	0.8	0.325697		0.000630379
Ivory	Glacier	New Zealand	Alpha
Jamtalferner	Glacier	Austria	Alpha	1.06494	0.488827	0	0.698324	0.261872	0.139665	0.104749	0.157123	0.174581	0.157123		0.324721	10	1	0.216598		0.0263909
Johnsons	Glacier	Antarctica	Alpha		1.01664	0.720887	1.21996	1.40481	0.794824	0.77634	1.23845	0.683919	1.71904		1.06387	9	0.9	0.979068		0.452162
Jostefonn	Glacier	Norway	Alpha
Karsojietna	Glacier	Sweden	Alpha
Kesselwandferner	Glacier	Austria	Alpha	1.27249	1.09697	0	0.892204	0.965336	0.482668	0.321779	0.614305	0.409536	0.380284		0.643557	10	1	0.549134		0.0289286
Kleinfleisskees	Glacier	Austria	Alpha	0.816	0.208	0	1.2	1.008	0.16	0.368	0.384	0.416	0.768		0.5328	10	1	0.424744		0.00208793
Koryto	Glacier	Russia	Alpha
Kozelskiy	Glacier	Russia	Alpha
La Conejera	Glacier	Colombia	Alpha						0.025208	0.201664	1.84018	0.100832	0.0504159		0.44366	5	0.5	0.165561		0.00114853
Langfjordjokelen	Glacier	Norway	Alpha	0	0	0	0	0.44843	0	0.672646	0.848815	0	0.192184		0.216208	10	1	0.124573		0.0647586
Lemon Creek	Glacier	US (Alaska)	Alpha	1.15373	1.0039	0.0749176	0.884028	0.913995	1.01888	1.07881	1.19868	0.958945	0.749176		0.903506	10	1	0.871097		0.24211
Leviy Aktru	Glacier	Russia	Alpha	0.950041	0.917281	0.917281	0.933661	1.01556	0.950041	0.933661		1.09746			0.964373	8	0.8	0.761489		0.26249
Limmern	Glacier	Switz.	Alpha
Lower Curtis	Glacier	US	Alpha	0.39847	1.08384	0.557858	0.478164	0.318776	0.637552	0.956328	1.05196	0.318776	0.92445		0.672617	10	1	0.583129		0.041648
Lynch	Glacier	US	Alpha	0.379881	0.987692	0.57742	0.303905	0.227929	0.638201	1.06367	1.15484	0.379881	0.850935		0.656435	10	1	0.564132		0.0342554
Maarmaglaciaren	Glacier	Sweden	Alpha	0.733272	0.458295	0.183318	0.427742	0.458295	0.336083	0.397189	1.31378	0.458295	0.549954		0.531622	10	1	0.423468		0.00197293
Maladeta	Glacier	Spain	Alpha	1.57931	0.228885	0	0	0	1.16732	1.21309	0.77821	0	1.83108		0.679789	10	1	0.591601		0.045178
Malavalle	Glacier	Italy	Alpha		0.768927	0.512618	0.926656	0.729495	0.236593	0.177445	0.177445	0.709779	0.828076		0.563004	9	0.9	0.412039		0.00558432
Maliy Aktru	Glacier	Russia	Alpha	0.892074	0.731208	0.77508	0.921322	1.05294	0.87745	0.804329		1.19918			0.906698	8	0.8	0.700227		0.196999
Martial Este	Glacier	Argentina	Alpha	1.78253	0	0.713012	0	0.231729	0.677362	1.10517	0.998217	0.909091			0.713012	9	0.9	0.568139		0.0572513
Marukh	Glacier	Russia	Alpha
McCall	Glacier	US (Alaska)	Alpha
Midtre Lovenbreen	Glacier	Norway (Spitsbergen)	Alpha	0.331553			0	0.092098	0.257874	0.47891	0.699945	0.534168	0.534168		0.36609	8	0.8	0.203971		0.0123179
Minaret	Glacier	Canada	Alpha
Mittivakkat	Glacier	Greenland	Alpha	0	0.707262	1.29377	0.0862515	0	0.310505	0	0.707262	0.310505	0		0.341556	10	1	0.232011		0.0216206
Mutnovskiy NE	Glacier	Russia	Alpha
Mutnovskiy SW	Glacier	Russia	Alpha
No. 125 (Vodopadniy)	Glacier	Russia	Alpha	1.00818	0.964348	0.935126	0.964348	1.03741	0.97896	0.97896		1.24196			1.01366	8	0.8	0.8149		0.327245
No. 104	Glacier	Russia	Alpha
No. 356	Glacier	Russia	Alpha
Noisy Creek	Glacier	US	Alpha	0	1.55986	0	0	0	0	0.0187935	0.375869	0	0.563804		0.251832	10	1	0.153289		0.050968
North Klawatti	Glacier	US	Alpha	0	1.20724	0	0.318578	0.0503018	0.318578	0.838364	1.17371	0	1.17371		0.508048	10	1	0.398135		0.000364245
Obrucheva	Glacier	Russia	Alpha
Ochsentaler	Glacier	Switz.	Alpha
Pendente	Glacier	Italy	Alpha	1.46811	0	0	0.216606	0.0481348	0	0	0	0.168472	0.577617		0.247894	10	1	0.150038		0.0524465
Peyto	Glacier	Canada	Alpha	0.564726	0.803649	0	0.629887	0.456125	0.217202	0.86881	0.89053	0.390964			0.535766	9	0.9	0.385167		0.00215321
Place	Glacier	Canada	Alpha	0.448888			0	0.020404	0	0.530504	0.81616	0.10202			0.273997	7	0.7	0.120346		0.0300312
Plattalva	Glacier	Switz.	Alpha
Praviy Aktru	Glacier	Russia	Alpha
Rabots Glaciar	Glacier	Sweden	Alpha	0.24326	0.283803	0.0202716			0.385161		0.871681	0.729779	0.263531		0.399641	7	0.7	0.20108		0.00589815
Rainbow	Glacier	US	Alpha	0.634058	1.02657	0.754831	0.679348	0.573671	0.694444	1.14734	1.20773	0.543478	1.20773		0.84692	10	1	0.797748		0.175308
Ram River	Glacier	Canada	Alpha
Rhone	Glacier	Switz.	Alpha
Sandalee	Glacier	US	Alpha	0	0.252171	0	0	0	0.112076	0.168114	1.12076	0	1.84926		0.350238	10	1	0.240068		0.019316
Sary-Tor	Glacier	Kirgizstan	Alpha
Sentinel	Glacier	Canada	Alpha
Sforzellina	Glacier	Italy	Alpha
Shaune Garang	Glacier	India	Alpha
Sholes	Glacier	US	Alpha	0.411914	1.02978	0.554499	0.396071	0.237643	0.712928	1.14068	1.18821	0.237643	1.3308		0.724018	10	1	0.644553		0.070492
Shumskiy	Glacier	Russia	Alpha
Silver	Glacier	US	Alpha	1.41112	1.13732	0.779275	0.294861	0.168492	0.126369	0.168492	0.84246	0.273799	1.85341		0.70556	10	1	0.622309		0.059175
Silvretta	Glacier	Switz.	Alpha	1.28228	1.02944	0	0.957197	0.469568	0.0361206	0.379267	0.55987	0.108362	0.794654		0.561676	10	1	0.456353		0.0059757
Sonnblickkees	Glacier	Austria	Alpha	0.673741	0.589523	0.0168435	1.0443	0.741115	0.488462	0.033687	0.387401	0.808489	0.387401		0.517096	10	1	0.407809		0.00082708
South Cascade	Glacier	US	Alpha	0	1.59121	0.132601	0.0947149	0.0947149	0.18943	1.13658	0.606175	0			0.427269	9	0.9	0.283137		0.0037388
Spoerteggbreen	Glacier	Norway	Alpha
Storbreen	Glacier	Norway	Alpha	0.426743	0	0.0355619	0.391181	0.76458	0	0.533428	0.906828	0.94239	0.0711238		0.407183	10	1	0.294656		0.00712246
Storglaciaren	Glacier	Sweden	Alpha	0.663864	0.818765	0.641735	0.885152	0.951538	0.376189	1.10644	1.17283	0.818765	0.619606		0.805488	10	1	0.745144		0.134025
Storglombreen	Glacier	Norway	Alpha	0	0	0	1.22219	1.23786							0.492009	5	0.5	0.190569		2.18097e-06
Storsteinsfjellbreen	Glacier	Norway	Alpha
Superguksoak	Glacier	Canada	Alpha
Suyok Zapadniy	Glacier	Russia	Alpha
Svartisheibreen	Glacier	Norway	Alpha
Tarfalaglaciaren	Glacier	Sweden	Alpha				0.425532	0.012951	0	1.3506	0.555042		0		0.390688	6	0.6	0.167124		0.00606132
Trollbergdalsbreen	Glacier	Norway	Alpha
Ts. Tuyuksuyskiy	Glacier	Russia	Alpha	0.741319	0.682794	1.01444	0.819352	0.936403	0.429185	0.663285	0.429185	1.28755	1.07296		0.807647	10	1	0.747862		0.136022
Urumqihe S. No. 1	Glacier	China	Alpha	0.709921	0.656003	0.871675	0.73688	0.916607	0.557153	0.575126	0.305536	1.15025	0		0.647915	10	1	0.554198		0.0306766
Vermuntglacier	Glacier	Austria	Alpha
Vernagtferner	Glacier	Austria	Alpha	0.704753	0.794722	0	0.509822	0.59979	0.374869	0.2849	0.254911	0.209927	0.344879		0.407857	10	1	0.295319		0.00701094
Waldemarbreen	Glacier	Norway (Spitsbergen)	Alpha	0.0213904	0.427807	0.299465	0.449198	0.320856	0.342246	0.278075	0.663102	0.342246			0.349376	9	0.9	0.215338		0.017586
Watson	Glacier	US	Alpha
White	Glacier	Canada	Alpha	0.711	1.11529	0.808588	1.04559	0.460059	0.850411	0.348529	0.292765	0.404294	0.808588		0.684511	10	1	0.597197		0.0475881
Wolverine	Glacier	US (Alaska)	Alpha	1.10489	0.938399	0.96867	0.560012	0.696231	0.938399	0.938399	1.18057	0.696231			0.891311	9	0.9	0.76963		0.203999
Woolsey	Glacier	Canada	Alpha
Wurtenkees	Glacier	Austria	Alpha	0.915141	0.110926	0.0831947	0.776484	0.443705	0.471436	0.110926	0.415973	0.915141	0.554631		0.479756	10	1	0.368288		0.000115822
Xiaodongkemadi	Glacier	China	Alpha
Yawning	Glacier	US	Alpha	0.307361	1.18334	0.153681	0.307361	0.230521	0.829876	1.07576	1.07576	0.461042	1.07576		0.670048	10	1	0.580101		0.0404215
Yuri	Glacier	Canada	Alpha
Zavisha	Glacier	Canada	Alpha
Zongo	Glacier	Bolivia	Alpha	1.09043	0.930503	1.10497	0.697877	0.537947	1.03228	0.930503	1.11951	0.799651	0.930503		0.917418	10	1	0.889388		0.260445
Number of observations				64	64	69	72	73	76	73	69	70	56		0.490025		68.6	33.6157		5.57648
Mean				0.679365	0.687255	0.354772	0.529985	0.510283	0.445969	0.617697	0.776432	0.515567	0.670989				Mean	-0.509975		0.287215
Std deviation				0.482642	0.426444	0.381012	0.42589	0.422301	0.401729	0.433424	0.441978	0.390289	0.533136						Std error	0.0679674	(95% confidence interval)
Std error				0.0603302	0.0533055	0.0458684	0.0501917	0.0494266	0.0460815	0.0507285	0.0532079	0.0466484	0.0712433
Ice caps (pV calc.)
Name	Glacier/ice cap	Country	Data to right	2001	2002	2003	2004	2005	2006	2007	2008	2009	2010		Mean alpha 2001-10	Count Mn	f	Weighted alpha^gamma		Variance calc.
n=19
Aalfotbreen	Ice cap outlet	Norway	Alpha	0	0	0	0.942893	1.38765	0	1.72567	1.40544	0.853941	0		0.63156	10	1	0.563013		6.15697e-05
Austdalsbreen	Ice cap	Norway	Alpha	0	0	0	0.696864	1.18164	0	1.13619	1.07559	0.848356	0		0.493865	10	1	0.414009		0.0199254
Breidamjok. E.B.	Ice cap	Iceland	Alpha	0.685484	0.712366	0.806452	0.672043	0.510753							0.677419	5	0.5	0.307285		0.00176445
Bruarjokull	Ice cap	Iceland	Alpha	1.06831	0.955002	0.841696	0.793137	0.388475	0.809323	0.874069	0.82551	0.955002	0.226611		0.773713	10	1	0.725646		0.0290634
Devon NW	Ice cap	Canada	Alpha	0.291215	0.970717	0.647144	1.05161	0.550073	0.453001	0.388287	0.258858	0.2438	0.3576		0.52123	10	1	0.442881		0.012608
Dyngjujokull	Ice cap outlet	Iceland	Alpha					0.608153					0.361604		0.484878	2	0.2	0.0809228		0.0045332
Engabreen	Ice cap	Norway	Alpha	0	0.902859	0.919579	1.38773	1.33757	0.43471	1.40445	1.28741	1.05334	0.785822		0.951346	10	1	0.939557		0.147756
Eyjabakkajokull	Ice cap	Iceland	Alpha	1.07411	0.841389	0.698174	0.66237	0.447547	0.644468	0.841389	0.698174	0.75188	0.322234		0.698174	10	1	0.638197		0.00689404
Hansbreen	Ice cap	Norway (Spitsbergen)	Alpha	0	0.467814	0.467814	0.467814	1.21632	1.14147	1.01048	1.12275	0.467814	0.72979		0.709207	10	1	0.650828		0.00915106
Hardangerjokulen	Ice cap	Norway	Alpha	0.566114	0.633509	0	1.01092	1.13223	0	1.14571	1.10527	1.06483	0		0.665858	10	1	0.601488		0.00214569
Hofsjokull E (Thjorsarjokull)	Ice cap outlet	Iceland	Alpha	0.564016	0.808423	0.658018	0.695619	1.01523	0.864824	0.827223	0.864824	0.940026			0.804245	9	0.9	0.685453		0.0383588
Hofsjokull N (Satujokull)	Ice cap outlet	Iceland	Alpha	0.797925	0.758029	0.658288	0.598444	0.837822	0.817874	1.01735	0.758029	0.977459			0.802358	9	0.9	0.683444		0.0375337
Hofsjokull SW (Blagnipujokull)	Ice cap	Iceland	Alpha	0.409165	1.04337	0.961538	0.490998	1.04337	1.02291	0.920622	0.94108	1.10475			0.881979	9	0.9	0.769246		0.0807577
Koeldukvislarj kull	Ice cap	Iceland	Alpha	0.763731	0.909977	0.844979	0.747481	0.747481	0.877478	0.958726	0.828729	0.926227	0.129997		0.773481	10	1	0.725374		0.0289705
Kongsvegen	Ice cap	Norway (Spitsbergen)	Alpha	0.269207	0.641955	0.517706	0.103541	0.393456	0.952578	0.807621	1.38745	0.828329	1.07683		0.697867	10	1	0.637846		0.00683592
Langjokull S. Dome	Ice cap	Iceland	Alpha	0.496894	0.496894	0.408163	0.585626	0.727595	0.727595	0.479148	0.496894	0.887311	0		0.530612	10	1	0.452868		0.010465
Nigardsbreen	Ice cap	Norway	Alpha	1.0528	0.411252	0	1.15151	1.43116	0.0658003	1.49696	1.49696	1.31601	0.230301		0.865274	10	1	0.83453		0.0780441
Riukojietna	Ice cap	Sweden	Alpha		0	0			0	0	0	0.0365163	0		0.00521662	7	0.7	0.000981374		0.214659
Tungnaarjokull	Ice cap	Iceland	Alpha	0.714634	0.568459	0.730875	0.649667	0.617184	0.665909	0.649667	0.600942	0.7796	0		0.597694	10	1	0.525531		0.000878258
Number of observations				17	18	18	17	18	17	17	17	17	15		0.624509		17.1	10.6791		0.730405
Mean				0.514918	0.61789	0.508913	0.747545	0.865206	0.557526	0.922562	0.891407	0.825599	0.281386				Mean	-0.375491		0.212995
Std deviation				0.379701	0.336854	0.354911	0.296873	0.357745	0.40319	0.415292	0.408373	0.315474	0.33867						Std error	0.100955	(95% confidence interval)
Std error				0.0920909	0.0793972	0.0836533	0.0720022	0.0843212	0.097788	0.100723	0.099045	0.0765137	0.0874441
[truncated: 10 more columns]

## Sheet: D. Pentadal mass balance
Name	Glacier/ice cap	Country	Data to right	1971	1972	1973	1974	1975	1976	1977	1978	1979	1980	1981	1982	1983	1984	1985	1986	1987	1988	1989	1990	1991	1992	1993	1994	1995	1996	1997	1998	1999	2000	2001	2002	2003	2004	2005	2006	2007	2008	2009	2010
n=144
Aalfotbreen	Ice cap outlet	Norway	Mass balance (kg m-2 yr-1)	940	-110	2180	1030	1210	1530	-560	-510	-130	-610	220	-130	1600	1320	-560	-410	2070	-2480	2930	1790	790	2290	2180	780	1200	-1880	80	110	60	1990	-2093	-1530	-2502	-100	668	-3190	1270	680	-170	-1840
Abramov	Glacier	Kirgizstan	Mass balance (kg m-2 yr-1)	-790	330	-820	-580	-2580	-900	-1450	-1310	-390	-1080	60	-840	-510	-1680	-860	-1010	240	-10	-220	-540	-430	400	300	-750	-780	-354	-1737	204
Alexander	Glacier	Canada	Mass balance (kg m-2 yr-1)									-500	-520	-180	-1180	-1400	100					-970	-1070
Andrei	Glacier	Canada	Mass balance (kg m-2 yr-1)								-830	-640	-180	70	-970	-790	140					-460	-420
Antizana15Alpha	Glacier	Equador	Mass balance (kg m-2 yr-1)																									-1830	-342	-639	-912	510	378	-598	-1038	-1366	-604	-1216	-203	-904	337	-828	-938
Austdalsbreen	Ice cap	Norway	Mass balance (kg m-2 yr-1)																		-1280	1840	1200	0	540	910	-70	620	-1070	-530	190	-480	1110	-1620	-2010	-2340	-960	190	-2060	180	-70	-700	-2000
Austre Broggerbreen	Glacier	Norway (Spitsbergen)	Mass balance (kg m-2 yr-1)	-580	-310	-80	-920	-310	-450	-110	-560	-710	-520	-550	-40	-270	-730	-550	-320	220	-520	-450	-660	130	-100	-1030	-160	-780	-170	-710	-860	-360	-20	-480	-580	-900	-1120	-1000	-730	-460	-130	-246	-440
Baby	Glacier	Canada	Mass balance (kg m-2 yr-1)	-476	321		132	319	149	-480													-313	-143	-71	-594	-153	-353	165	-126	-21	-925	-560	-100	293	-334		-370
Bahia Del Diablo	Glacier	Antarctica	Mass balance (kg m-2 yr-1)																														-560	-60	-510	-150	-110	-230	-580	-80	-530	-255	370
Basodino	Glacier	Switz.	Mass balance (kg m-2 yr-1)																						349	-82	444	614	166	-209	-1074	-443	-781	591	-356	-2043	-490	-1172	-2501	-902	-1168	130	-584
Bench	Glacier	Canada	Mass balance (kg m-2 yr-1)											-610	-930	-540	-190	-880			0	-1060	-1070
Blue	Glacier	US	Mass balance (kg m-2 yr-1)	1150	400	-140	2000	670	1420	-1240	510	-1150	-1610	-1310	750	1340	490	420	-920	-790	220	-640	-1180	-790	-1180	-1350	-1750	-10	-790	-490	-880	1090
Bondhusbreen	Glacier	Norway	Mass balance (kg m-2 yr-1)							1000	-510	330	-450
Breidalblikkbrea	Glacier	Norway	Mass balance (kg m-2 yr-1)																																	-2260	-940	-280	-2940	430	-300	-520	-1940
Breidamjok. E.B.	Ice cap	Iceland	Mass balance (kg m-2 yr-1)																												-1430		-1220	-1100	-863	-775	-1330	-1530
Brewster	Glacier	New Zealand	Mass balance (kg m-2 yr-1)																																			1141	282	297	-1653	-828
Bruarjokull	Ice cap	Iceland	Mass balance (kg m-2 yr-1)																							1090	550	-342	-220		-670	-300	-1010	140	52	-568	-800	-1557	-790	-536	-503	-122	-1570
Calderone	Glacier	Italy	Mass balance (kg m-2 yr-1)																															-511	-1847	-264	252	-194	1090	-2320	275	401	702
Careser	Glacier	Italy	Mass balance (kg m-2 yr-1)	-650	400	-1280	-320	170	-270	990	80	-180	10	-840	-1680	-790	-590	-760	-1140	-1640	-1010	-820	-1580	-1730	-1200	-300	-1740	-1080	-1320	-930	-2240	-1800	-1610	-250	-1149	-3317	-1562	-2005	-2093	-2745	-1851	-1236	-962
Charquini Sur	Glacier	Bolivia	Mass balance (kg m-2 yr-1)																																	-884	-1486	-2499	-376	-482	161	-1616	-2921
Chhota Shigri	Glacier	India	Mass balance (kg m-2 yr-1)																																	-1416	-1227	144	-1413
Ciardoney	Glacier	Italy	Mass balance (kg m-2 yr-1)																						-970	-410	-1100	-560	-370	-660	-3360	-2430	-1230	160	-400	-3000	-1060	-2230	-2099	-1490	-1510	-490	-830
Columbia (2057)	Glacier	US	Mass balance (kg m-2 yr-1)														210	-310	-200	-630	140	-90	-60	380	-1850	-900	-960	-450	-620	350	-1460	1750	400	-1520	600	-1170	-1830	-3210	-980	-370	960	-900	-210
Daniels	Glacier	US	Mass balance (kg m-2 yr-1)														110	-510	-360	-870	-150	-370	-680	-70	-1700	-830	-450	240	450	880	-1820	1520	-250	-1750	-180	-1520	-2130	-2900	1250	120	410	-1350	-260
Devon NW	Ice cap	Canada	Mass balance (kg m-2 yr-1)	-69	102	-95	-77	-69	176	-99	27	39	-57	-146	-95	105	-31	-108	184	44	-216	-69	-166	-230	96	-62	-32	-147	-80	-13	-276	-217	-320	-559	-21	-139	46	-262	-242	-291	-394	-523	-417
Djankuat	Glacier	Russia	Mass balance (kg m-2 yr-1)	-230	-1140	-280	240	-910	290	-370	440	-310	380	-910	420	-970	210	-380	-500	1540	520	40	340	-310	-130	1100	-840	40	-150	270	-1000	-560	-1140	-620	430	280	730	390	-800	-2010	100	-120	-600
Dyngjujokull	Ice cap outlet	Iceland	Mass balance (kg m-2 yr-1)																						1700	1270	190	20	-390	-1060	-490							-1327	-353	95	-24	227	-1540
Easton	Glacier	US	Mass balance (kg m-2 yr-1)																				-580	410	-1670	-1010	-920	-310	220	530	-1870	1610	-100	-1930	180	-980	-1060	-2450	790	260	450	-2060	680
Emmons	Glacier	US	Mass balance (kg m-2 yr-1)																																	-2822			-940	-430	-630	-1800
Engabreen	Ice cap	Norway	Mass balance (kg m-2 yr-1)	1010	-70	2720	800	1610	2410	880	-510	420	-500	980	840	1060	1050	-900	250	940	-1790	3170	850	690	2340	1040	420	1700	830	1220	210	-30	1490	-1530	-557	-584	817	897	-1430	1030	310	-30	-520
Eyjabakkajokull	Ice cap	Iceland	Mass balance (kg m-2 yr-1)																					-900	40	740	460	-420	-850	-2200	-1390	-1120	-2020	286	-1093	-1094	-1310	-2202	-1425	-636	-1282	-507	-1750
Filleck K.	Glacier	Austria	Mass balance (kg m-2 yr-1)	-300	120	-860	690	560	280	230	870	130	860
Findelen	Glacier	Switz.	Mass balance (kg m-2 yr-1)																																			-200	-1200	-200	-300	100	-470
Fontana Bianca	Glacier	Italy	Mass balance (kg m-2 yr-1)														395	-600	-107	-486	-1096				-1091	-556	-955	-682	-440	-620	-1620	-970	-740	395	-435	-2950	-994	-1471	-1753	-1607	-1246	-622
Foss	Glacier	US	Mass balance (kg m-2 yr-1)														510	-690	120	-380	230	90	-270	300	-1920	-730	-680	310	340	500	-1950	1560	-100	-1920	100	-1350	-1940	-3120	-1020	-380	180	-2020	-110
Garabashi	Glacier	Russia	Mass balance (kg m-2 yr-1)														340	-100	-640	410	270	30	90	-30	140	310	-430	-10	-30	190	-1510	-820	-1060	-750	260	160	250	200	-656	-633	-423	-371	-1240
Goldbergkees	Glacier	Austria	Mass balance (kg m-2 yr-1)																															-388	-612	-1806	137	-260	-1077	-1106	-651	-542	-216
Golubin	Glacier	Kirgizstan	Mass balance (kg m-2 yr-1)	-90	-109	-391	-462	-236	-397	-322	-460	-289	-500	150	-210	-222	-485	-557	-372	152	-432	-422	-590	-573	-454	-276	-501
Graafjellsbrea	Glacier	Norway	Mass balance (kg m-2 yr-1)				580	250																												-2170	-820	10	-3040	780	-140	-540	-1840
Graasubreen	Glacier	Norway	Mass balance (kg m-2 yr-1)	-470	-640	-890	340	-950	-1000	-390	-220	40	-890	-190	-510	-50	-370	0	-760	720	-580	450	730	-520	-100	420	0	-110	-450	-1690	110	-390	-50	24	-1415	-1394	-492	-493	-2080	-710	80	-280	-1060
Gries	Glacier	Switz.	Mass balance (kg m-2 yr-1)	-527	408	-1095	-178	378	-1021	1166	1056	-855	570	-324	-1304	-779	-4	-526	-947	-733	-924	-1071	-1988	-1344	-1125	-1052	-209	-278	-517	-1068	-2053	-564	-985	-229	-990	-2711	-1146	-1512	-1995	-1473	-1601	-883	-1307
Gulkana	Glacier	US (Alaska)	Mass balance (kg m-2 yr-1)	-55	-178	542	-1298	-179	-664	-308	-237	-559	378	50	-309	-66	-352	353	54	-102	-116	-607	-551	-89	-227	-1794	-523	-806	-427	-1823	-499	-1189	49	-612	-1016	-283	-2625	-705	-286	-1393	-118	-654	-1832
Hamtah	Glacier	India	Mass balance (kg m-2 yr-1)																															-1654	-1221	-1621	-1857	-1856	-1391
Hansbreen	Ice cap	Norway (Spitsbergen)	Mass balance (kg m-2 yr-1)																			-530	-900	-280	-31	-243	222	-418			-600	-350	-480	-1100	-606	-569	-577	47	93	-4	149	-844	-14
Hansebreen	Glacier	Norway	Mass balance (kg m-2 yr-1)																-580	1130	-2740	420	320	915	974	1082	426	481	-2020	-150	-300	110	870	-2720	-1930	-2670	-500	-90	-3980	840	260	-970	-2220
Hardangerjokulen	Ice cap	Norway	Mass balance (kg m-2 yr-1)	740	-80	830	410	150	150	-720	-300	300	-1400	850	-700	1700	-100	-520	-100	940	-1150	2110	1930	-90	1990	1910	160	300	-1070	-530	690	50	1430	-845	-708	-1364	80	723	-2220	1170	450	150	-1490
Hellstugubreen	Glacier	Norway	Mass balance (kg m-2 yr-1)	-130	-490	-210	240	-360	-730	-720	-540	-20	-1240	-330	-350	170	-510	-290	-490	450	-1040	720	660	-450	140	300	70	-120	-740	-1650	-20	-420	190	-364	-1415	-1528	-843	-287	-2010	-670	-60	-230	-1340
Helm	Glacier	Canada	Mass balance (kg m-2 yr-1)					-357	568	-1464	-783	-2731	-944		-340	-209	-320	-1728	-1334	-788	-150	-1670	-1790	-2239	-2798	-2342	-1885	-1465	211	-1073	-2850	1500	110	-600	-2544	-1895	-1995	-2765	-2750	-210	-2300	-510
Hidden	Glacier	Canada	Mass balance (kg m-2 yr-1)												-238	-213	-816
Hintereisferner	Glacier	Austria	Mass balance (kg m-2 yr-1)	-600	-74	-1229	55	65	-314	760	411	-219	-50	-173	-1240	-580	32	-574	-732	-717	-945	-637	-995	-1325	-1120	-570	-1110	-460	-827	-591	-1232	-861	-633	-173	-647	-1814	-667	-1061	-1516	-1797	-1235	-1182	-1419
Hoegtuvbreen	Glacier	Norway	Mass balance (kg m-2 yr-1)	-742	-963	1088	-207	722	910	-520
Hofsjokull E (Thjorsarjokull)	Ice cap outlet	Iceland	Mass balance (kg m-2 yr-1)																			1000	110	-990	1610	1110	-180	-800	-1170	-1150	-1180	-510	-970	-1550	-730	-1310	-1630	-20	-490	-870	-790	-170	-2830
Hofsjokull N (Satujokull)	Ice cap outlet	Iceland	Mass balance (kg m-2 yr-1)																		-740	580	-600	-1410	1060	910	80	-680	-780	-1050	-680	-250	-1340	-580	-1000	-980	-1360	-430	-510	-870	-570	-350	-2400
Hofsjokull SW (Blagnipujokull)	Ice cap	Iceland	Mass balance (kg m-2 yr-1)																			450	-680	-1490	1190	130	-740	-1170	-1230	-1420	-1590	-1090	-1750	-1890	-640	-1170	-1500	-580	-610	-860	-930	-350	-3490
Hurd	Glacier	Antarctica	Mass balance (kg m-2 yr-1)																																-140	-520	10	-120	-860	-540	190	-390	290
Ice Worm	Glacier	US	Mass balance (kg m-2 yr-1)														860	-750	-450	-1390	-240	-670	-920	630	-2230	-1020	-1230	470	570	760	-1640	2150	-330	-2150	50	-1400	-2000	-2850	-1350	-620	-100	-1560	-380
IGAN	Glacier	Russia	Mass balance (kg m-2 yr-1)	-140	380	320	-930	920	-1780	-1620	-370	1020	-1110
Irenebreen	Glacier	Norway (Spitsbergen)	Mass balance (kg m-2 yr-1)																																-613	-630	-605	-862	-822	-695	-357	-630
Ivory	Glacier	New Zealand	Mass balance (kg m-2 yr-1)	-1320	-1660	-1730	-3480	-4000
Jamtalferner	Glacier	Austria	Mass balance (kg m-2 yr-1)																			-439	-426	-1439	-1230	-370	-830	-150	-550	-217	-1319	-257	-80	-62	-671	-2229	-228	-975	-1293	-1438	-981	-953	-1434
Johnsons	Glacier	Antarctica	Mass balance (kg m-2 yr-1)																																20	-160	80	220	-330	290	90	-170	510
Jostefonn	Glacier	Norway	Mass balance (kg m-2 yr-1)																										-1620	-420	300	380	1020
Karsojietna	Glacier	Sweden	Mass balance (kg m-2 yr-1)												330	340							350	70	870	970
Kesselwandferner	Glacier	Austria	Mass balance (kg m-2 yr-1)	46	368	-380	573	369	-37	701	423	66	162	161	-620	-182	178	-8	-494	-243	-265	-151	-242	-849	-410	120	-830	140	-111	11	-604	-12	140	525	17	-1546	-188	-59	-617	-837	-444	-795	-670
Kleinfleisskees	Glacier	Austria	Mass balance (kg m-2 yr-1)																															-195	-808	-1442	125	-111	-655	-946	-623	-403	-758
Koeldukvislarj kull	Ice cap	Iceland	Mass balance (kg m-2 yr-1)																						980		-30	-590	-630	-1170	-980	-540	-730	-818	-227	-1075	-776	-627	-402	-342	-587	-134	-2870
Kongsvegen	Ice cap	Norway (Spitsbergen)	Mass balance (kg m-2 yr-1)																	540	-50	-150	-300	430	320	-380	500	-350	390	100	-710	-150	330	-480	-220	-350	-740	-440	20	-90	418	-78	130
Koryto	Glacier	Russia	Mass balance (kg m-2 yr-1)												-284														1140	2340	-2120	660	-440
Kozelskiy	Glacier	Russia	Mass balance (kg m-2 yr-1)			580	1640	-50	1330	-880	-940	-200	0	-1950	60	-250	-340	2020	-1660	-300	-1940	-740	-1280	460	-410	-350	-670	-230	600	940
La Conejera	Glacier	Colombia	Mass balance (kg m-2 yr-1)																																				-1936	-995	1557	-2484	-3075
Langfjordjokelen	Glacier	Norway	Mass balance (kg m-2 yr-1)																			-560	-320	0	190	200	-725	245	20	-690	-1440	-1580	-610	-2280	-1540	-1070	-1920	-1250	-2410	-810	-350	-1320	-760
Langjokull S. Dome	Ice cap	Iceland	Mass balance (kg m-2 yr-1)																											-1300	-1700	-770	-750	-1271	-1656	-1946	-1487	-894	-1080	-1412	-1842	-362	-3800
Lemon Creek	Glacier	US (Alaska)	Mass balance (kg m-2 yr-1)	-400	-650	-520	-370	290	-250	-480	-900	-630	-270	-810	-430	-1620	-250	330	-510	-840	110	-1240	-1110	-380	-660	-980	-760	-1310	-1580	-1810	-1460	200	650	400	-250	-1900	-650	-470	-170	150	800	-700	-580
Leviy Aktru	Glacier	Russia	Mass balance (kg m-2 yr-1)							240	-370	-680	-20	-320	-410	280	320	150	60	200	370	30	50	-480	-190	240	-360	-30	-170	-150	-1120	-140	-290	-240	-370	-400	-260	40	-190	-320	-810	470
Limmern	Glacier	Switz.	Mass balance (kg m-2 yr-1)	-1332	-225	-1043	39	540	-998	788	856	-36	721	-111	-649	-803	-333	250	-360	190	-220	-308
Lower Curtis	Glacier	US	Mass balance (kg m-2 yr-1)														390	-160	-220	-560	-60	-290	-510	40	-1760	-480	-550	-210	-180	270	-1380	1550	-250	-1880	130	-1250	-1510	-2750	-1060	-400	120	-2150	-440
Lynch	Glacier	US	Mass balance (kg m-2 yr-1)														330	-220	-70	-300	170	30	-120	360	-1380	-620	-400	180	530	620	-1970	1450	-240	-1820	-130	-1200	-1980	-2620	-1050	70	510	-1820	-340
Maarmaglaciaren	Glacier	Sweden	Mass balance (kg m-2 yr-1)																				-120	-200	90	270	-340	100	-380	-200	-280	-300	130	-410	-660	-1420	-580	-790	-1650	-530	120	-1390	-500
Maladeta	Glacier	Spain	Mass balance (kg m-2 yr-1)																						-327	-32	351	-643	207	512	-955	-764	-900	502	-811	-1102	-1516	-1479	-1787	-947	-38	-1415	259
Malavalle	Glacier	Italy	Mass balance (kg m-2 yr-1)																																-909	-1461	-208	-800	-1322	-1358	-900	-517	-197
Maliy Aktru	Glacier	Russia	Mass balance (kg m-2 yr-1)	250	70	100	-1470	400	680	490	-410	-580	110	-310	-660	150	310	240	40	170	470	220	130	-540	-170	340	-150	160	-130	-50	-1230	-110	-210	-190	-410	-370	-150	160	-140	-300	-870	590
Martial Este	Glacier	Argentina	Mass balance (kg m-2 yr-1)																															785	-682	-202	-1318	-991	-513	99	-56	-119	930
Marukh	Glacier	Russia	Mass balance (kg m-2 yr-1)	-900	-1190	-120	-370	-1260	340	-820	190	-160	-1470	-360	-180
McCall	Glacier	US (Alaska)	Mass balance (kg m-2 yr-1)	-120	-140																					-480	-740	-550	30	-450	-860	-560	-310
Midtre Lovenbreen	Glacier	Norway (Spitsbergen)	Mass balance (kg m-2 yr-1)	-460	-220	-20	-890	-210	-350	-40	-480	-660	-430	-460	20	-170	-680	-480	-210	240	-490	-240	-510	100	-140	-880	-120	-790	20	-430	-590	-340	-30	-330	-520	-790	-970	-740	-480	-250	-9	-138	-200
Minaret	Glacier	Canada	Mass balance (kg m-2 yr-1)												56	285	-156
Mittivakkat	Glacier	Greenland	Mass balance (kg m-2 yr-1)																										10	-400	-1170	-770	-830	-960	-500	340	-1070	-1820	-580	-1580	-520	-1010	-2160
Mutnovskiy NE	Glacier	Russia	Mass balance (kg m-2 yr-1)										28	-470	680	-160	550
Mutnovskiy SW	Glacier	Russia	Mass balance (kg m-2 yr-1)										29	-480	1150	-140	230
Nigardsbreen	Ice cap	Norway	Mass balance (kg m-2 yr-1)	820	-140	1100	480	270	400	-770	-130	710	-1220	310	-420	1090	340	-220	-100	1480	-890	3470	1770	200	1600	1850	560	1190	-410	470	970	170	1720	-219	-888	-1159	-43	1098	-1399	1047	1100	240	-800
No. 104	Glacier	Russia	Mass balance (kg m-2 yr-1)						220	190	-240								80	-70	420
No. 125 (Vodopadniy)	Glacier	Russia	Mass balance (kg m-2 yr-1)							80	-190	-780	-120	-10	-310	160	290	210	120	180	160	100	140	-420	-20	100	-210	50	-120	-170	-980	-90	-190	-140	-290	-320	-220	60	-260	-270	-720	380
No. 356	Glacier	Russia	Mass balance (kg m-2 yr-1)															-134	-143	220	-453	-167
Noisy Creek	Glacier	US	Mass balance (kg m-2 yr-1)																							-953	-1163	-108	224	1060	-1135	1218	472	-1326	462	-952	-1575	-2410	-320	-360	-290	-1190	-180
North Klawatti	Glacier	US	Mass balance (kg m-2 yr-1)																							-1069	-1929	-470	343	1425	-1233	1257	868	-1767	224	-1367	-1272	-2060	-1140	-740	-220	-1830	250
Obrucheva	Glacier	Russia	Mass balance (kg m-2 yr-1)	-210	850	180	-680	170	-890	-1500	1560	-10	1070	-940
Ochsentaler	Glacier	Switz.	Mass balance (kg m-2 yr-1)																					-705	-1120	-190	-980	50	-270	60	-936	-30
Pendente	Glacier	Italy	Mass balance (kg m-2 yr-1)																										-534	-12	-1182	-541	-1363	49	-1323	-2122	-429	-1372	-1687	-2154	-1484	-844	-134
Peyto	Glacier	Canada	Mass balance (kg m-2 yr-1)	-410	-250	430	240	-570	640	-210	-1050	-810	-580	-1130	-560	-390	-580	-810	-470	-620	-990	-590	-740	-1215		-1215	1295	-300	129	-818	-2210	-320	810	-920	-500	-1370	-550	-810	-1650	-1850	-230	-1020
Place	Glacier	Canada	Mass balance (kg m-2 yr-1)	-343	-344	-299	562	-238	877	-1227	-433	-2212	-923	-1093	-754	-441	-337	-1882	-1312	-845	-969	-1040	-938	-990	-790	-2280	-2010	-2486	-221	-888	-2450	620	130	-760	-123	-995	-2210	-1295	-1900	-150	-490	-1500
Plattalva	Glacier	Switz.	Mass balance (kg m-2 yr-1)	-1406	-363	-985	189	659	-849	544	1276	-159	980	-181	-246	-549	74	400	-750	260	-310	-780
Praviy Aktru	Glacier	Russia	Mass balance (kg m-2 yr-1)										250	-330	-310	330	330	290	150	230	310	190	70
Rabots Glaciar	Glacier	Sweden	Mass balance (kg m-2 yr-1)												-70	-110	-510	-1280	-188	223	-1052	618	-40	-216	110	510	-100	80	-470	-140	-470	-400	-230	-760	-879	-1440		-1170	-1630		350	-500	-1080
Rainbow	Glacier	US	Mass balance (kg m-2 yr-1)														580	40	200	-260	430	-240	-460	440	-1650	-800	-720	-200	120	510	-1490	1840	150	-1710	120	-980	-1670	-2650	-610	290	650	-1980	760
Ram River	Glacier	Canada	Mass balance (kg m-2 yr-1)	-940	-130	-40	60	-620
Rhone	Glacier	Switz.	Mass balance (kg m-2 yr-1)										889	87	-375	-160
Riukojietna	Ice cap	Sweden	Mass balance (kg m-2 yr-1)																-540	-260	-910	890	210	80	586	350	-295	253	-60	-980	-840	-801	-312	-1730	-1830	-1780		-350	-1400	-960	-590	-720	-960
Sandalee	Glacier	US	Mass balance (kg m-2 yr-1)																								-190	365	826	1030	-901	1481	860	-898	752	-1155	-1232	-2293	-400	-60	-140	-650	240
Sary-Tor	Glacier	Kirgizstan	Mass balance (kg m-2 yr-1)														-88	-145	-142	270	-453	-880
Sentinel	Glacier	Canada	Mass balance (kg m-2 yr-1)	570	240	780	2110	880	1470	-1329	363	-1740	272	170	860	1200	850	-840	-372	98	367	-882
Sforzellina	Glacier	Italy	Mass balance (kg m-2 yr-1)																	-920	-970	-570	-1160	-1210	-770	-286	-712	-728	-816	-814	-1682	-1209	-1440
Shaune Garang	Glacier	India	Mass balance (kg m-2 yr-1)												-570	-500	460	-100	30	-790	-630	340	-270
Sholes	Glacier	US	Mass balance (kg m-2 yr-1)																				-320	480	-1880	-960	-880	-250	60	420	-1560	1760	-80	-1830	210	-1120	-1860	-2840	-710	290	200	-2680	940
Shumskiy	Glacier	Russia	Mass balance (kg m-2 yr-1)	-720	60	-840	-1125	-620	-390	-1200	-1490	-870	-1070	-260	-790	-1050	-1000	-338	-438	-581	29	274	-581	-1101
Silver	Glacier	US	Mass balance (kg m-2 yr-1)																							-57	-185	436	572	1220	-811	740	521	-1227	-147	-1421	-563	-1490	-1010	-650	260	-1990	550
Silvretta	Glacier	Switz.	Mass balance (kg m-2 yr-1)	-758	-259	-1102	763	322	-218	422	887	-149	735	479	-697	-487	717	207	-367	-944	-413	-393	-709	-1238	-1144	-244	-708	-129	-143	-263	-1591	-196	12	673	-298	-2529	-120	-1050	-1449	-916	-639	-1097	-268
Sonnblickkees	Glacier	Austria	Mass balance (kg m-2 yr-1)	-392	128	-721	576	397	79	148	833	224	834	414	-1282	-535	338	-281	-1432	-525	-711	252	-561	-818	-2098	-315	-1385	141	-245	314	-1696	-647	-33	-399	-485	-2870	8	-323	-621	-2175	-777	-254	-792
South Cascade	Glacier	US	Mass balance (kg m-2 yr-1)	600	1430	-1040	1020	-50	950	-1300	-380	-1560	-1020	-840	80	-770	120	-1200	-710	-2560	-1640	-710	-730	-200	-2010	-1230	-1020	-690	100	630	-1860	1020	380	-1570	550	-2100	-1650	-2450	-1450	-210	-290	-1860	-810
Spoerteggbreen	Glacier	Norway	Mass balance (kg m-2 yr-1)																		1000	1140	1020	30
Storbreen	Glacier	Norway	Mass balance (kg m-2 yr-1)	180	-310	80	240	-150	-90	-540	-440	-100	-1310	-100	-470	200	-300	-400	-320	320	-950	1200	1250	-150	150	690	-250	-150	-1030	-1030	220	-240	550	-570	-1786	-1566	-585	-63	-2150	-390	110	-220	-1760
Storglaciaren	Glacier	Sweden	Mass balance (kg m-2 yr-1)	-190	-1050	50	-340	1170	270	200	-80	-210	-1270	-190	260	280	120	-720	-60	480	-840	1240	590	170	880	1000	-370	700	-390	-630	-520	-180	580	-700	-830	-1040	-120	-70	-1720	410	580	-530	-690
Storglombreen	Glacier	Norway	Mass balance (kg m-2 yr-1)															-410	450	-1690	-1690												1110	-1760	-1250	-1100	110	330
Storsteinsfjellbreen	Glacier	Norway	Mass balance (kg m-2 yr-1)																					-40	1040	950	-210	570
Superguksoak	Glacier	Canada	Mass balance (kg m-2 yr-1)												-56	211	-606
Suyok Zapadniy	Glacier	Russia	Mass balance (kg m-2 yr-1)	-461													-1348					-499	-676	-527
Svartisheibreen	Glacier	Norway	Mass balance (kg m-2 yr-1)																		-1610	2360	820	170	1210	910	-20	800	400	700	5	-600	700
Tarfalaglaciaren	Glacier	Sweden	Mass balance (kg m-2 yr-1)																0	900	-1290	1230	50	160	1360								1190	-370			-380	-920	-2530	210	-200	-1710	-1060
Trollbergdalsbreen	Glacier	Norway	Mass balance (kg m-2 yr-1)	-330	-1240	760	-400	-280															-120	0	600	210	-1100
Ts. Tuyuksuyskiy	Glacier	Russia	Mass balance (kg m-2 yr-1)	-330	130	-300	-620	-450	-720	-1100	-1480	-520	-630	110	-630	-540	-1250	-550	-520	-340	-610	-460	-960	-1100	-240	602	-443	-587	-456	-1467	-359	-230	-113	-555	-302	359	62	-340	-969	-915	-1357	206	30
Tungnaarjokull	Ice cap	Iceland	Mass balance (kg m-2 yr-1)																30						240	130	-140			-1880	-1480	-1020	-1280	-1629	-1276	-1220	-1699	-1757	-1569	-997	-1340	-809	-3551
Urumqihe S. No. 1	Glacier	China	Mass balance (kg m-2 yr-1)	102	262	-707	-24	306	29	180	-110	-76	-335	-652	-45	100	-83	-612	-699	-176	-642	106	52	-706	23	-29	-378	-229	41.5	-884	-776	-781	-310.5	-1159	-1264	-622	-775	-491.5	-713	-619	-931	63	-1327
Vermuntgl.	Glacier	Austria	Mass balance (kg m-2 yr-1)																					-1490	-1350	-570	-1450	-240	-720	-500	-1544	-528
Vernagtferner	Glacier	Austria	Mass balance (kg m-2 yr-1)	-424	137	-460	230	171	50	352	288	44	140	55	-845	-537	20	-112	-808	-290	-497	-312	-568	-1079	-858	-472	-1028	-398	-413	-487	-1003	-108	-287	-224	-266	-2133	-407	-523	-882	-966	-843	-959	-680
Waldemarbreen	Glacier	Norway (Spitsbergen)	Mass balance (kg m-2 yr-1)																									-322	22	-390	-798	-684	-319	-767	-514	-727	-641	-722	-747	-771	-322	-649
Watson	Glacier	US	Mass balance (kg m-2 yr-1)																		550	-340	-240
White	Glacier	Canada	Mass balance (kg m-2 yr-1)	-184	115	190	-46	247	112	-372	-134	-109				-83	-55	-12	-259	-617	128	28	-448	-179	-295	-480	-314	-362	38	-56	-229	-494	-401	-151	32	-106	37	-612	-93	-818	-817	-580	-188
Wolverine	Glacier	US (Alaska)	Mass balance (kg m-2 yr-1)	93	-1001	454	-1221	-227	-844	1174	409	-1289	1786	3109	-135	-314	-268	905	-153	1214	767	-1449	-2298	81	-239	-744	-895	-703	-1395	-1901	565	-726	360	206	-593	-404	-2367	-1839	-876	-821	880	-1779	-85
Woolsey	Glacier	Canada	Mass balance (kg m-2 yr-1)	70	250		700
Wurtenkees	Glacier	Austria	Mass balance (kg m-2 yr-1)													-1029	30	-1095	-1572	-825	-785	-143	-760	-894	-1248	-484	-1617	-414	-638	-154	-1313	-1135	-680	-300	-966	-2177	-313	-448	-778	-1200	-938	-584	-519
Xiaodongkemadi	Glacier	China	Mass balance (kg m-2 yr-1)																			525	49	-191	376	211	-540	-570	-530	370	-670
Yawning	Glacier	US	Mass balance (kg m-2 yr-1)														90	-230	-100	-470	-60	-190	-320	230	-2060	-660	-620	-260	340	500	-2030	1630	-180	-1940	260	-1850	-1780	-3020	-930	-130	480	-1620	170
Yuri	Glacier	Canada	Mass balance (kg m-2 yr-1)								-50	-570	-730	-140	-960	-1110	140					-1820	-420
Zavisha	Glacier	Canada	Mass balance (kg m-2 yr-1)						1100	-260	390	-690	-670	-200	-520	370	310	-1210
Zongo	Glacier	Bolivia	Mass balance (kg m-2 yr-1)																						-900	516	-88	-703	-675	797	-1962	-333	77	557	-58	-86	-521	-1559	-197	-173	257	-631	-739
Number of observations				48	47	45	48	48	46	49	49	49	52	49	56	56	66	59	62	63	69	76	77	74	78	82	83	82	84	85	87	83	84	84	87	92	89	95	94	91	92	92	81
Mean				-227.25	-145.426	-117.622	-1.4375	-30.4375	71.0435	-242.163	-113.837	-411.429	-260.096	-196.429	-336.393	-149.071	-22.3939	-335.373	-396.5	-118.746	-483.159	22.8158	-276.481	-351.946	-254.256	-95	-473.675	-216.561	-286.661	-279.894	-1028.76	-69.6265	-135.363	-753.214	-578	-1261.39	-847.854	-955.174	-1092.46	-547.429	-304.783	-745.5	-858.963
Std deviation				580.111	570.114	876.002	933.419	902.428	831.125	775.103	680.912	677.7	764.553	716.405	568.695	687.112	545.676	611.292	463.98	806.067	747.679	1014.19	791.059	662.554	1130.83	875.385	644.666	629.374	607.325	872.251	799.826	934.257	800.287	811.22	660.771	822.299	754.278	1048.48	897.684	777.882	714.012	708.877	1063.34
Std error				83.7319	83.1597	130.587	134.727	130.254	122.543	110.729	97.2732	96.8143	106.024	102.344	75.9951	91.8192	67.168	79.5835	58.9256	101.555	90.0099	116.335	90.1496	77.0203	128.041	96.6701	70.7612	69.5028	66.2646	94.6089	85.7504	102.548	87.3185	88.5113	70.8421	85.7306	79.9533	107.572	92.589	81.5442	74.4409	73.9056	118.149
			Mass balance (kg m-2 yr-1)	1971-1975	1976-1980	1981-1985	1986-1990	1991-1995	1996-2000	2001-2005	2006-2010
			Kaser et al. (2006)	-90.3333	-310	-237	-258.333	-286.333	-483	-509.7
			Cogley (2012)	-213	-414	-360	-338	-334	-526	-748	-487
			Arithmetic mean, all GIC (method 1)	-44.4017	-195.351	-203.063	-244.833	-277.541	-365.3	-885.469	-708.242
			Arithmetic mean, high-mass regions only (method 2) (see sheet: E)	-281.736	-330.154	-215.2	-200.598	-311.716	-428.442	-534.066	-386.304
			Regional upscaling (method 3) (see sheet: F)							-501.616	-464.154

## Sheet: E. High mass regions
Name	Glacier/ice cap	Country	Data to right	1971	1972	1973	1974	1975	1976	1977	1978	1979	1980	1981	1982	1983	1984	1985	1986	1987	1988	1989	1990	1991	1992	1993	1994	1995	1996	1997	1998	1999	2000	2001	2002	2003	2004	2005	2006	2007	2008	2009	2010
n=38
Abramov	Glacier	Kirgizstan	AAR	37	74	24	40	29	24	5	6	46	26	57	42	48	15	42	28	64	54	50	46	46	68	66	44	46	48	12	64
Austre Broggerbreen	Glacier	Norway (Spitsbergen)	AAR	23	32	60	2	35	20	45	20	2	17	14	56	34	6	14	25	83	15	15	8	58	39	0	48	8	49	7	0	14	31	7			0	0	5	10	25	16	13
Baby	Glacier	Canada	AAR	1	100			99	83
Bahia Del Diablo	Glacier	Antarctica	AAR																														31	50	30	40	44	38	41	49	33	43
Chhota Shigri	Glacier	India	AAR																																	31	31	74	29
Devon NW	Ice cap	Canada	AAR	52	86	62	49	56	95	47	68	68	42	35	59	79	59	47	83	62	34	49	45	27	84	50	65.7543	45	28	56	29	35	23	18	60	40	65	34	28	24	16	15	22
Golubin	Glacier	Kirgizstan	AAR		80	74	42	58	49	67	67	67	58	84.9	64.4	65.9	75.3	49.7	41.5	77	67	67	52	67	63	63	73
Gulkana	Glacier	US (Alaska)	AAR	63	54	72	38	58	55	62	62	59	64	69	63	63	61	73	70	64	62	58	58	68	63	45	60	56	61	46	58	52	68	57	51	66	48	56	64	53	66	56	43
Hamtah	Glacier	India	AAR																															8	11	11	7		12
Hansbreen	Ice cap	Norway (Spitsbergen)	AAR																			45	32	62	45	31	71	25			25	39	0	0	25	25	25	65	61	54	60	25	39
Hidden	Glacier	Canada	AAR												41	47	25
Hurd	Glacier	Antarctica	AAR																																36	11	54	41	20	22	69	34	77
Irenebreen	Glacier	Norway (Spitsbergen)	AAR																																29	25	27	10	24	20	31	6
Johnsons	Glacier	Antarctica	AAR																																55	39	66	76	43	42	67	37	93
Kongsvegen	Ice cap	Norway (Spitsbergen)	AAR																	82	63	53	50	73	68	22	78	28	59	45	8	54	63	13	31	25	5	19	46	39	67	40	52
Lemon Creek	Glacier	US (Alaska)	AAR																									38	5	5	7	68	82	77	67	5	59	61	68	72	80	64	50
Leviy Aktru	Glacier	Russia	AAR							66	49	45	60	57	49	67	68	61	60	62	66	58	61	46	56	72	56	67	61	60	44	60	58	58	56	56	57	62	58	57		67
Maliy Aktru	Glacier	Russia	AAR	83	75	76	22	89	90	87	38	36	80	59	34	82	84	82	71	77	83	76	73	28	67	76	67	75	68	68	27	72	61	61	50	53	63	72	60	55		82
Martial Este	Glacier	Argentina	AAR																															100	0	40	0	13	38	62	56	51
McCall	Glacier	US (Alaska)	AAR	48	47																					30	22	18	58	50	30	44	55
Midtre Lovenbreen	Glacier	Norway (Spitsbergen)	AAR	37	46	58	2	48	29	60	29	9	30	23	62	52	21	20	42	77	27	41	19	68	40	0	66	6	58	36	30		36	18			0	5	14	26	38	29	29
Minaret	Glacier	Canada	AAR												47	58	41
Mittivakkat	Glacier	Greenland	AAR																										56	41	0	18	5	0	41	75	5	0	18	0	41	18	0
No. 104	Glacier	Russia	AAR																35	30	67
No. 125 (Vodopadniy)	Glacier	Russia	AAR							74	58	9	61	64	22	71	74	73	71	71	77	73	73	15	72	80	68	72	68	66	0	71	67	69	66	64	66	71	67	67		85
No. 356	Glacier	Russia	AAR															42	38	56	27	37
Praviy Aktru	Glacier	Russia	AAR										53	36	39	65	62	57	47	53	62	61	45
Sary-Tor	Glacier	Kirgizstan	AAR															42	38	56	27	37
Shaune Garang	Glacier	India	AAR												32	47	67.5	57	62	22	46	61.5	46
Shumskiy	Glacier	Russia	AAR															50	37	40	45	56	37	24
Superguksoak	Glacier	Canada	AAR												46	61	20
Suyok Zapadniy	Glacier	Russia	AAR	25													13					23	22	22
Ts. Tuyuksuyskiy	Glacier	Russia	AAR	38	59	38	35	34	37	32	6	25	39	58	37.7	23.5	10	42	34	40	35	37	28	22	38	80	44	31	34	0	45	45	51	38	35	52	42	48	22	34	22	66	55
Urumqihe S. No. 1	Glacier	China	AAR	57	67	31	43	68	46	65	28	33	48	29	48	57	58	30	27	49	36	66	71	31	68	69	40	51	67.5	24.5	34.5	32.5	51	39.5	36.5	48.5	41	51	31	32	17	64	0
Waldemarbreen	Glacier	Norway (Spitsbergen)	AAR																										48	42	0	7	21	1	20	14	21	15	16	13	31	16
White	Glacier	Canada	AAR	59	86	82	69	81	80	59	67	65				71	69	76	62	9	91	90	16	50	16	12	28	46	82	65	65	40	36	51	80	58	75	33	61	25	21	29	58
Wolverine	Glacier	US (Alaska)	AAR	71	39	72	42	69	53	78	70	48	90	87	64	67	64	72	65	82	85	42	32	62	65	66	62	64	46	39	73	60	71	73	62	64	37	46	62	62	78	46
Xiaodongkemadi	Glacier	China	AAR																			95	78	42	90	80
Number of observations				13	13	11	11	12	12	13	13	13	13	13	17	18	19	18	19	20	20	22	20	18	16	17	16	16	17	17	18	16	18	19	20	21	23	22	23	21	18	21	13
Mean				45.6923	65	59	34.9091	60.3333	55.0833	57.4615	43.6923	39.3846	51.3846	51.7615	47.4176	58.8	46.9895	51.65	49.2895	57.8	53.45	54.1136	44.6	45.0556	58.875	49.5294	55.7971	42.25	52.7353	38.9706	29.9722	44.4688	45	38.8684	42.075	40.119	36.4348	40.4545	38.6087	38.9524	45.4444	42.3333	40.8462
Mean, 10-yr running average									51.1941	51.801	50.0428	50.0228	51.2308	50.3625	49.7831	49.817	50.7927	52.2656	51.5872	50.9166	52.0623	51.1353	52.016	51.076	51.4206	49.5377	47.1899	46.2254	46.2654	45.6467	43.9667	43.0256	41.0894	40.9099	39.4972	39.4954	41.0426	40.8291	40.4137
Std deviation				22.0469	20.664	19.601	19.7355	22.1085	26.1828	21.3761	23.8655	22.8675	20.8548	22.7919	12.578	14.9433	26.2193	19.2095	17.7884	20.9952	22.1513	19.5922	20.4384	19.2765	18.9486	28.408	16.4469	21.7025	17.9026	22.1419	24.3784	19.9361	23.2859	30.4457	20.4259	20.4425	24.8209	25.5133	20.5111	20.4853	22.1923	23.0029	27.9071
Std error				6.1147	5.73116	5.90993	5.95048	6.38219	7.55832	5.92865	6.61911	6.34231	5.78408	6.32135	3.05061	3.52217	6.01512	4.52772	4.08093	4.69468	4.95319	4.17708	4.57015	4.54352	4.73715	6.88995	4.11171	5.42563	4.34202	5.3702	5.74605	4.98403	5.48855	6.98472	4.56737	4.46093	5.17551	5.43945	4.27685	4.47026	5.23077	5.01964	7.74004
			AAR	1971-1975	1976-1980	1981-1985	1986-1990	1991-1995	1996-2000	2001-2005	2006-2010	2003-2010
			High-mass, Arithmetic mean	53.2667	49.3125	51.2929	51.9208	50.1657	42.093	39.5286	41.0833	40.213
Name	Glacier/ice cap	Country	Data to right	1971	1972	1973	1974	1975	1976	1977	1978	1979	1980	1981	1982	1983	1984	1985	1986	1987	1988	1989	1990	1991	1992	1993	1994	1995	1996	1997	1998	1999	2000	2001	2002	2003	2004	2005	2006	2007	2008	2009	2010
n=38
Abramov	Glacier	Kirgizstan	Mass balance (kg m-2 yr-1)	-790	330	-820	-580	-2580	-900	-1450	-1310	-390	-1080	60	-840	-510	-1680	-860	-1010	240	-10	-220	-540	-430	400	300	-750	-780	-354	-1737	204
Austre Broggerbreen	Glacier	Norway (Spitsbergen)	Mass balance (kg m-2 yr-1)	-580	-310	-80	-920	-310	-450	-110	-560	-710	-520	-550	-40	-270	-730	-550	-320	220	-520	-450	-660	130	-100	-1030	-160	-780	-170	-710	-860	-360	-20	-480	-580	-900	-1120	-1000	-730	-460	-130	-246	-440
Baby	Glacier	Canada	Mass balance (kg m-2 yr-1)	-476	321		132	319	149	-480													-313	-143	-71	-594	-153	-353	165	-126	-21	-925	-560	-100	293	-334		-370
Bahia Del Diablo	Glacier	Antarctica	Mass balance (kg m-2 yr-1)																														-560	-60	-510	-150	-110	-230	-580	-80	-530	-255	370
Chhota Shigri	Glacier	India	Mass balance (kg m-2 yr-1)																																	-1416	-1227	144	-1413
Devon NW	Ice cap	Canada	Mass balance (kg m-2 yr-1)	-69	102	-95	-77	-69	176	-99	27	39	-57	-146	-95	105	-31	-108	184	44	-216	-69	-166	-230	96	-62	-32	-147	-80	-13	-276	-217	-320	-559	-21	-139	46	-262	-242	-291	-394	-523	-417
Golubin	Glacier	Kirgizstan	Mass balance (kg m-2 yr-1)	-90	-109	-391	-462	-236	-397	-322	-460	-289	-500	150	-210	-222	-485	-557	-372	152	-432	-422	-590	-573	-454	-276	-501
Gulkana	Glacier	US (Alaska)	Mass balance (kg m-2 yr-1)	-55	-178	542	-1298	-179	-664	-308	-237	-559	378	50	-309	-66	-352	353	54	-102	-116	-607	-551	-89	-227	-1794	-523	-806	-427	-1823	-499	-1189	49	-612	-1016	-283	-2625	-705	-286	-1393	-118	-654	-1832
Hamtah	Glacier	India	Mass balance (kg m-2 yr-1)																															-1654	-1221	-1621	-1857	-1856	-1391
Hansbreen	Ice cap	Norway (Spitsbergen)	Mass balance (kg m-2 yr-1)																			-530	-900	-280	-31	-243	222	-418			-600	-350	-480	-1100	-606	-569	-577	47	93	-4	149	-844	-14
Hidden	Glacier	Canada	Mass balance (kg m-2 yr-1)												-238	-213	-816
Hurd	Glacier	Antarctica	Mass balance (kg m-2 yr-1)																																-140	-520	10	-120	-860	-540	190	-390	290
Irenebreen	Glacier	Norway (Spitsbergen)	Mass balance (kg m-2 yr-1)																																-613	-630	-605	-862	-822	-695	-357	-630
Johnsons	Glacier	Antarctica	Mass balance (kg m-2 yr-1)																																20	-160	80	220	-330	290	90	-170	510
Kongsvegen	Ice cap	Norway (Spitsbergen)	Mass balance (kg m-2 yr-1)																	540	-50	-150	-300	430	320	-380	500	-350	390	100	-710	-150	330	-480	-220	-350	-740	-440	20	-90	418	-78	130
Lemon Creek	Glacier	US (Alaska)	Mass balance (kg m-2 yr-1)	-400	-650	-520	-370	290	-250	-480	-900	-630	-270	-810	-430	-1620	-250	330	-510	-840	110	-1240	-1110	-380	-660	-980	-760	-1310	-1580	-1810	-1460	200	650	400	-250	-1900	-650	-470	-170	150	800	-700	-580
Leviy Aktru	Glacier	Russia	Mass balance (kg m-2 yr-1)							240	-370	-680	-20	-320	-410	280	320	150	60	200	370	30	50	-480	-190	240	-360	-30	-170	-150	-1120	-140	-290	-240	-370	-400	-260	40	-190	-320	-810	470
Maliy Aktru	Glacier	Russia	Mass balance (kg m-2 yr-1)	250	70	100	-1470	400	680	490	-410	-580	110	-310	-660	150	310	240	40	170	470	220	130	-540	-170	340	-150	160	-130	-50	-1230	-110	-210	-190	-410	-370	-150	160	-140	-300	-870	590
Martial Este	Glacier	Argentina	Mass balance (kg m-2 yr-1)																															785	-682	-202	-1318	-991	-513	99	-56	-119	930
McCall	Glacier	US (Alaska)	Mass balance (kg m-2 yr-1)	-120	-140																					-480	-740	-550	30	-450	-860	-560	-310
Midtre Lovenbreen	Glacier	Norway (Spitsbergen)	Mass balance (kg m-2 yr-1)	-460	-220	-20	-890	-210	-350	-40	-480	-660	-430	-460	20	-170	-680	-480	-210	240	-490	-240	-510	100	-140	-880	-120	-790	20	-430	-590	-340	-30	-330	-520	-790	-970	-740	-480	-250	-9	-138	-200
Minaret	Glacier	Canada	Mass balance (kg m-2 yr-1)												56	285	-156
Mittivakkat	Glacier	Greenland	Mass balance (kg m-2 yr-1)																										10	-400	-1170	-770	-830	-960	-500	340	-1070	-1820	-580	-1580	-520	-1010	-2160
No. 104	Glacier	Russia	Mass balance (kg m-2 yr-1)						220	190	-240								80	-70	420
No. 125 (Vodopadniy)	Glacier	Russia	Mass balance (kg m-2 yr-1)							80	-190	-780	-120	-10	-310	160	290	210	120	180	160	100	140	-420	-20	100	-210	50	-120	-170	-980	-90	-190	-140	-290	-320	-220	60	-260	-270	-720	380
No. 356	Glacier	Russia	Mass balance (kg m-2 yr-1)															-134	-143	220	-453	-167
Praviy Aktru	Glacier	Russia	Mass balance (kg m-2 yr-1)										250	-330	-310	330	330	290	150	230	310	190	70
Sary-Tor	Glacier	Kirgizstan	Mass balance (kg m-2 yr-1)														-88	-145	-142	270	-453	-880
Shaune Garang	Glacier	India	Mass balance (kg m-2 yr-1)												-570	-500	460	-100	30	-790	-630	340	-270
Shumskiy	Glacier	Russia	Mass balance (kg m-2 yr-1)	-720	60	-840	-1125	-620	-390	-1200	-1490	-870	-1070	-260	-790	-1050	-1000	-338	-438	-581	29	274	-581	-1101
Superguksoak	Glacier	Canada	Mass balance (kg m-2 yr-1)												-56	211	-606
Suyok Zapadniy	Glacier	Russia	Mass balance (kg m-2 yr-1)	-461													-1348					-499	-676	-527
Ts. Tuyuksuyskiy	Glacier	Russia	Mass balance (kg m-2 yr-1)	-330	130	-300	-620	-450	-720	-1100	-1480	-520	-630	110	-630	-540	-1250	-550	-520	-340	-610	-460	-960	-1100	-240	602	-443	-587	-456	-1467	-359	-230	-113	-555	-302	359	62	-340	-969	-915	-1357	206	30
Urumqihe S. No. 1	Glacier	China	Mass balance (kg m-2 yr-1)	102	262	-707	-24	306	29	180	-110	-76	-335	-652	-45	100	-83	-612	-699	-176	-642	106	52	-706	23	-29	-378	-229	41.5	-884	-776	-781	-310.5	-1159	-1264	-622	-775	-491.5	-713	-619	-931	63	-1327
Waldemarbreen	Glacier	Norway (Spitsbergen)	Mass balance (kg m-2 yr-1)																									-322	22	-390	-798	-684	-319	-767	-514	-727	-641	-722	-747	-771	-322	-649
White	Glacier	Canada	Mass balance (kg m-2 yr-1)	-184	115	190	-46	247	112	-372	-134	-109				-83	-55	-12	-259	-617	128	28	-448	-179	-295	-480	-314	-362	38	-56	-229	-494	-401	-151	32	-106	37	-612	-93	-818	-817	-580	-188
Wolverine	Glacier	US (Alaska)	Mass balance (kg m-2 yr-1)	93	-1001	454	-1221	-227	-844	1174	409	-1289	1786	3109	-135	-314	-268	905	-153	1214	767	-1449	-2298	81	-239	-744	-895	-703	-1395	-1901	565	-726	360	206	-593	-404	-2367	-1839	-876	-821	880	-1779	-85
Xiaodongkemadi	Glacier	China	Mass balance (kg m-2 yr-1)																			525	49	-191	376	211	-540	-570	-530	370	-670
Number of observations				16	15	13	14	14	15	17	16	15	15	15	19	20	22	19	20	21	21	23	22	20	18	19	19	19	19	19	20	18	19	20	23	24	23	24	23	21	21	21	16
Mean				-268.125	-81.2	-191.308	-640.786	-237.071	-239.933	-212.176	-495.938	-540.2	-167.2	-24.6	-315.895	-196.85	-371.273	-103.579	-202.9	19.2381	-88.4762	-242.174	-471.909	-331.4	-90.1111	-325.211	-331.947	-467.211	-247.132	-636.684	-621.95	-439.778	-187.079	-407.3	-446.826	-508.917	-741.174	-549.979	-533.565	-460.857	-257.81	-336	-311.438
Mean, 10-yr running average									-307.394	-283.041	-306.511	-307.065	-280.114	-266.764	-263.061	-239.92	-199.173	-169.371	-199.842	-230.522	-207.943	-220.779	-216.847	-253.21	-257.633	-323.225	-376.573	-396.333	-367.85	-375.44	-411.112	-429.482	-470.405	-478.682	-507.325	-489.742	-453.328	-442.951	-455.387
Std deviation				304.843	364.778	454.345	525.457	746.334	454.555	640.278	542.21	340.447	686.847	913.753	275.89	483.521	591.099	440.443	317.045	470.723	415.965	490.273	548.453	384.189	272.608	593.308	350.31	356.292	492.069	741.079	499.411	352.594	355.963	562.613	379.483	536.006	760.825	614.741	409.543	482.923	571.776	546.71	831.918
Std error				76.2107	94.1852	126.013	140.434	199.466	117.366	155.29	135.552	87.9031	177.343	235.93	63.2934	108.119	126.023	101.044	70.8935	102.72	90.7711	102.229	116.931	85.9074	64.2542	136.114	80.3666	81.7391	112.888	170.015	111.672	83.1072	81.6634	125.804	79.1276	109.412	158.643	125.483	85.3957	105.382	124.772	119.302	207.98
			Mass balance (kg m-2 yr-1)	1971-1975	1976-1980	1981-1985	1986-1990	1991-1995	1996-2000	2001-2005	2006-2010	2003-2010
			High-mass, Arithmetic mean	-281.736	-330.154	-215.2	-200.598	-311.716	-428.442	-534.066	-386.304	-473.199
Name	Glacier/ice cap	Country	Data to right	1971	1972	1973	1974	1975	1976	1977	1978	1979	1980	1981	1982	1983	1984	1985	1986	1987	1988	1989	1990	1991	1992	1993	1994	1995	1996	1997	1998	1999	2000	2001	2002	2003	2004	2005	2006	2007	2008	2009	2010		Mean alpha 2001-10	Count Mn	f	Weighted alpha	Variance calc.
n=38
Abramov	Glacier	Kirgizstan	Alpha	0.663082	1.32616	0.430108	0.716846	0.519713	0.430108	0.0896057	0.107527	0.824373	0.46595	1.02151	0.752688	0.860215	0.268817	0.752688	0.501792	1.14695	0.967742	0.896057	0.824373	0.824373	1.21864	1.1828	0.78853	0.824373	0.860215	0.215054	1.14695
Austre Broggerbreen	Glacier	Norway (Spitsbergen)	Alpha	0.464271	0.645943	1.21114	0.0403714	0.7065	0.403714	0.908357	0.403714	0.0403714	0.343157	0.2826	1.1304	0.686314	0.121114	0.2826	0.504643	1.67541	0.302786	0.302786	0.161486	1.17077	0.787243	0	0.968914	0.161486	0.9891	0.1413	0	0.2826	0.625757	0.1413			0	0	0.100929	0.201857	0.504643	0.322971	0.262414		0.191764	8	0.8	0.153411	0.203377
Baby	Glacier	Canada	Alpha	0.0163052	1.63052			1.61422	1.35333
Bahia Del Diablo	Glacier	Antarctica	Alpha																														0.64543	1.04102	0.62461	0.832813	0.916094	0.791172	0.853633	1.0202	0.687071	0.895274			0.85132	9	0.9	0.766188	0.0217209
Chhota Shigri	Glacier	India	Alpha																																	0.446236	0.446236	1.06521	0.417446						0.593781	4	0.4	0.237513	0.00417679
Devon NW	Ice cap	Canada	Alpha	0.841288	1.39136	1.00307	0.792752	0.906002	1.53697	0.760395	1.10015	1.10015	0.679502	0.566251	0.954538	1.27811	0.954538	0.760395	1.34282	1.00307	0.550073	0.792752	0.728038	0.436823	1.359	0.808931	1.06381	0.728038	0.453001	0.906002	0.46918	0.566251	0.372108	0.291215	0.970717	0.647144	1.05161	0.550073	0.453001	0.388287	0.258858	0.2438	0.3576		0.52123	10	1	0.52123	0.030533
Golubin	Glacier	Kirgizstan	Alpha		1.07585	0.995159	0.56482	0.779989	0.658956	0.901022	0.901022	0.901022	0.779989	1.14174	0.866057	0.886229	1.01264	0.66837	0.558096	1.0355	0.901022	0.901022	0.699301	0.901022	0.84723	0.84723	0.981711
Gulkana	Glacier	US (Alaska)	Alpha	0.975232	0.835913	1.11455	0.588235	0.897833	0.851393	0.959752	0.959752	0.913313	0.990712	1.06811	0.975232	0.975232	0.944272	1.13003	1.08359	0.990712	0.959752	0.897833	0.897833	1.05263	0.975232	0.696594	0.928793	0.866873	0.944272	0.712074	0.897833	0.804954	1.05263	0.882353	0.789474	1.02167	0.743034	0.866873	0.990712	0.820433	1.02167	0.866873	0.665635		0.866873	10	1	0.866873	0.0292087
Hamtah	Glacier	India	Alpha																															0.387409	0.532688	0.532688	0.338983		0.581114						0.474576	5	0.5	0.237288	0.024507
Hansbreen	Ice cap	Norway (Spitsbergen)	Alpha																			0.842066	0.598802	1.16018	0.842066	0.58009	1.32859	0.467814			0.467814	0.72979	0	0	0.467814	0.467814	0.467814	1.21632	1.14147	1.01048	1.12275	0.467814	0.72979		0.709207	10	1	0.709207	0.000175274
Hidden	Glacier	Canada	Alpha												0.798131	0.914931	0.486665
Hurd	Glacier	Antarctica	Alpha																																0.677074	0.206884	1.01561	0.771112	0.376152	0.413767	1.29772	0.639458	1.44819		0.760663	9	0.9	0.684597	0.00376694
Irenebreen	Glacier	Norway (Spitsbergen)	Alpha																																0.696613	0.600528	0.648571	0.240211	0.576507	0.480423	0.744655	0.144127			0.516454	8	0.8	0.413164	0.0257799
Johnsons	Glacier	Antarctica	Alpha																																1.01664	0.720887	1.21996	1.40481	0.794824	0.77634	1.23845	0.683919	1.71904		1.06387	9	0.9	0.957486	0.121819
Kongsvegen	Ice cap	Norway (Spitsbergen)	Alpha																	1.69807	1.30462	1.09754	1.03541	1.5117	1.40816	0.455581	1.61524	0.57983	1.22179	0.93187	0.165666	1.11824	1.30462	0.269207	0.641955	0.517706	0.103541	0.393456	0.952578	0.807621	1.38745	0.828329	1.07683		0.697867	10	1	0.697867	3.60835e-06
Lemon Creek	Glacier	US (Alaska)	Alpha																									0.569374	0.0749176	0.0749176	0.104885	1.01888	1.22865	1.15373	1.0039	0.0749176	0.884028	0.913995	1.01888	1.07881	1.19868	0.958945	0.749176		0.903506	10	1	0.903506	0.0430723
Leviy Aktru	Glacier	Russia	Alpha							1.08108	0.802621	0.737101	0.982801	0.933661	0.802621	1.09746	1.11384	0.999181	0.982801	1.01556	1.08108	0.950041	0.999181	0.753481	0.917281	1.17936	0.917281	1.09746	0.999181	0.982801	0.720721	0.982801	0.950041	0.950041	0.917281	0.917281	0.933661	1.01556	0.950041	0.933661		1.09746			0.964373	8	0.8	0.771499	0.0576334
Maliy Aktru	Glacier	Russia	Alpha	1.21381	1.09681	1.11144	0.321732	1.30155	1.31617	1.2723	0.555718	0.52647	1.16993	0.862825	0.497221	1.19918	1.22843	1.19918	1.03832	1.12606	1.21381	1.11144	1.06756	0.409476	0.979819	1.11144	0.979819	1.09681	0.994443	0.994443	0.394852	1.05294	0.892074	0.892074	0.731208	0.77508	0.921322	1.05294	0.87745	0.804329		1.19918			0.906698	8	0.8	0.725358	0.0355258
Martial Este	Glacier	Argentina	Alpha																															1.78253	0	0.713012	0	0.231729	0.677362	1.10517	0.998217	0.909091			0.713012	9	0.9	0.641711	0.000261479
McCall	Glacier	US (Alaska)	Alpha	0.83045	0.813149																					0.519031	0.380623	0.311419	1.00346	0.865052	0.519031	0.761246	0.951557
Midtre Lovenbreen	Glacier	Norway (Spitsbergen)	Alpha	0.681525	0.847302	1.06834	0.0368392	0.884141	0.534168	1.10518	0.534168	0.165776	0.552588	0.423651	1.14202	0.957819	0.386812	0.368392	0.773623	1.41831	0.497329	0.755204	0.349972	1.25253	0.736784	0	1.21569	0.110518	1.06834	0.663106	0.552588		0.663106	0.331553			0	0.092098	0.257874	0.47891	0.699945	0.534168	0.534168		0.36609	8	0.8	0.292872	0.0870556
Minaret	Glacier	Canada	Alpha												1.01556	1.25324	0.885912
Mittivakkat	Glacier	Greenland	Alpha																										0.966017	0.707262	0	0.310505	0.0862515	0	0.707262	1.29377	0.0862515	0	0.310505	0	0.707262	0.310505	0		0.341556	10	1	0.341556	0.125608
No. 104	Glacier	Russia	Alpha																1.06968	0.91687	2.04768
No. 125 (Vodopadniy)	Glacier	Russia	Alpha							1.08124	0.847458	0.131502	0.891292	0.935126	0.321449	1.03741	1.08124	1.06663	1.03741	1.03741	1.12507	1.06663	1.06663	0.21917	1.05202	1.16891	0.993571	1.05202	0.993571	0.964348	0	1.03741	0.97896	1.00818	0.964348	0.935126	0.964348	1.03741	0.97896	0.97896		1.24196			1.01366	8	0.8	0.810929	0.0807436
No. 356	Glacier	Russia	Alpha															0.915232	0.828067	1.22031	0.588363	0.806276
Praviy Aktru	Glacier	Russia	Alpha										1.11251	0.755668	0.81864	1.3644	1.30143	1.19647	0.986566	1.11251	1.30143	1.28044	0.944584
Sary-Tor	Glacier	Kirgizstan	Alpha															0.938338	0.848972	1.25112	0.603217	0.826631
Shaune Garang	Glacier	India	Alpha												0.572963	0.84154	1.20859	1.02059	1.11012	0.393912	0.823635	1.10116	0.823635
Shumskiy	Glacier	Russia	Alpha															1.00929	0.746871	0.807428	0.908357	1.1304	0.746871	0.484457
Superguksoak	Glacier	Canada	Alpha												0.923509	1.22465	0.401526
Suyok Zapadniy	Glacier	Russia	Alpha	0.843455													0.438596					0.775978	0.74224	0.74224
Ts. Tuyuksuyskiy	Glacier	Russia	Alpha	0.741319	1.15099	0.741319	0.682794	0.663285	0.72181	0.624268	0.11705	0.48771	0.760827	1.13149	0.735466	0.458447	0.195084	0.819352	0.663285	0.780336	0.682794	0.72181	0.546235	0.429185	0.741319	1.56067	0.858369	0.60476	0.663285	0	0.877877	0.877877	0.994928	0.741319	0.682794	1.01444	0.819352	0.936403	0.429185	0.663285	0.429185	1.28755	1.07296		0.807647	10	1	0.807647	0.0124724
Urumqihe S. No. 1	Glacier	China	Alpha	1.02444	1.20417	0.557153	0.772825	1.22214	0.826743	1.16822	0.503235	0.593098	0.862689	0.521208	0.862689	1.02444	1.04242	0.53918	0.485262	0.880661	0.647017	1.1862	1.27606	0.557153	1.22214	1.24012	0.718907	0.916607	1.21316	0.440331	0.620058	0.584112	0.916607	0.709921	0.656003	0.871675	0.73688	0.916607	0.557153	0.575126	0.305536	1.15025	0		0.647915	10	1	0.647915	0.00230903
Waldemarbreen	Glacier	Norway (Spitsbergen)	Alpha																										1.02674	0.898396	0	0.149733	0.449198	0.0213904	0.427807	0.299465	0.449198	0.320856	0.342246	0.278075	0.663102	0.342246			0.349376	9	0.9	0.314439	0.108113
White	Glacier	Canada	Alpha	0.822529	1.19894	1.14318	0.961941	1.12923	1.11529	0.822529	0.934058	0.906176				0.989823	0.961941	1.05953	0.864352	0.125471	1.26865	1.25471	0.223059	0.697058	0.223059	0.167294	0.390353	0.641294	1.14318	0.906176	0.906176	0.557647	0.501882	0.711	1.11529	0.808588	1.04559	0.460059	0.850411	0.348529	0.292765	0.404294	0.808588		0.684511	10	1	0.684511	0.000131243
Wolverine	Glacier	US (Alaska)	Alpha	1.07462	0.590283	1.08975	0.635689	1.04435	0.80218	1.18057	1.05948	0.726502	1.36219	1.31679	0.96867	1.01408	0.96867	1.08975	0.983805	1.24111	1.28651	0.635689	0.484335	0.938399	0.983805	0.998941	0.938399	0.96867	0.696231	0.590283	1.10489	0.908128	1.07462	1.10489	0.938399	0.96867	0.560012	0.696231	0.938399	0.938399	1.18057	0.696231			0.891311	9	0.9	0.80218	0.034343
Xiaodongkemadi	Glacier	China	Alpha																			1.49583	1.22815	0.661313	1.4171	1.25964
																																														Sum	20.1	13.9889	1.05234
Number of observations				13	13	11	11	12	12	13	13	13	13	13	17	18	19	18	19	20	20	22	20	18	16	17	16	16	17	17	18	16	18	19	20	21	23	22	23	21	18	21	13
Mean				0.784025	1.06211	0.951383	0.555895	0.972413	0.879237	0.919578	0.678919	0.619505	0.842626	0.843125	0.831638	1.00353	0.789607	0.878622	0.863688	1.04384	0.953046	0.946749	0.772188	0.788998	0.981931	0.810389	0.941788	0.687334	0.90064	0.646671	0.49714	0.733944	0.760467	0.653638	0.728094	0.6984	0.624004	0.680596	0.670732	0.671555	0.818807	0.724974	0.724953				Mean alpha	0.695967	0.234726
Mean, 10-yr running average									0.826569	0.832479	0.809432	0.814647	0.838018	0.828639	0.827084	0.83951	0.866923	0.899647	0.892603	0.887191	0.90222	0.882906	0.898124	0.878995	0.88269	0.842974	0.797383	0.776102	0.77493	0.761394	0.736011	0.724812	0.693033	0.69236	0.669369	0.671857	0.704024	0.703127	0.699575									Std error	0.102617
Std deviation				0.301739	0.303387	0.257912	0.301256	0.307242	0.3734	0.310097	0.334686	0.335678	0.289679	0.312817	0.215227	0.221609	0.384091	0.270584	0.240988	0.365739	0.397668	0.257331	0.310599	0.344985	0.306114	0.466645	0.305442	0.314791	0.289106	0.344836	0.390891	0.29972	0.368185	0.482212	0.257861	0.298431	0.386588	0.409078	0.294841	0.320505	0.37161	0.356419	0.516698				Mean pA	-0.304033
Std error				0.0836874	0.0841445	0.0777634	0.090832	0.0886932	0.107791	0.0860054	0.0928253	0.0931002	0.0803424	0.0867598	0.0522003	0.0522338	0.0881165	0.0637772	0.0552865	0.0817818	0.0889213	0.0548631	0.0694521	0.0813137	0.0765286	0.113178	0.0763604	0.0786978	0.0701186	0.083635	0.0921339	0.0749299	0.086782	0.110627	0.0576595	0.0651229	0.0806092	0.0872157	0.0614786	0.06994	0.0875894	0.0777771	0.143306
The trend for 1971-2010 is: y = -0.00516x + 0.904; r2 = 0.19; significant at the 1% level; standard error (intercept) = 0.0403 and (x-variable) = 0.0017
The trend for 1971-1990 is: y = 0.00326x + 0.852; r2 = 0.02; insignificant; standard error (intercept) = 0.0631 and (x-variable) = 0.0052
The trend for 1991-2010 is: y = -0.0078x + 0.82; r2 = 0.17; significant at the 1% level; standard error (intercept) = 0.128 and (x-variable) = 0.0041
				1971-1975	1976-1980	1981-1985	1986-1990	1991-1995	1996-2000	2001-2005	2006-2010	2003-2010
			Number of observations	60	64	85	101	83	86	105	96	162
			High-mass, Arithmetic mean	0.870812	0.786547	0.87035	0.91703	0.840427	0.705632	0.67593	0.717884	0.696966
			Std deviation	0.33618	0.339895	0.291341	0.326432	0.361593	0.360464	0.36911	0.360412	0.361965
			Std error	0.0434007	0.0424869	0.0316004	0.0324812	0.03969	0.0388698	0.0360215	0.0367844	0.0284386
				1971-1980	1981-1990	1991-2000	2001-2010
			Number of observations	124	186	169	201
			High-mass, Arithmetic mean	0.827321	0.895698	0.771833	0.695967
			Std deviation	0.339371	0.310938	0.366233	0.364676
			Std error
High mass with continuous data
Name	Glacier/ice cap	Country	Data to right	1971	1972	1973	1974	1975	1976	1977	1978	1979	1980	1981	1982	1983	1984	1985	1986	1987	1988	1989	1990	1991	1992	1993	1994	1995	1996	1997	1998	1999	2000	2001	2002	2003	2004	2005	2006	2007	2008	2009	2010		Mean alpha 2001-10	Count Mn	f	Weighted alpha	Variance calc.
n=11
Austre Broggerbreen	Glacier	Norway (Spitsbergen)	Alpha	0.464271	0.645943	1.21114	0.0403714	0.7065	0.403714	0.908357	0.403714	0.0403714	0.343157	0.2826	1.1304	0.686314	0.121114	0.2826	0.504643	1.67541	0.302786	0.302786	0.161486	1.17077	0.787243	0	0.968914	0.161486	0.9891	0.1413	0	0.2826	0.625757	0.1413			0	0	0.100929	0.201857	0.504643	0.322971	0.262414		0.191764	8	0.8	0.153411	0.219522
Devon NW	Ice cap	Canada	Alpha	0.841288	1.39136	1.00307	0.792752	0.906002	1.53697	0.760395	1.10015	1.10015	0.679502	0.566251	0.954538	1.27811	0.954538	0.760395	1.34282	1.00307	0.550073	0.792752	0.728038	0.436823	1.359	0.808931	1.06381	0.728038	0.453001	0.906002	0.46918	0.566251	0.372108	0.291215	0.970717	0.647144	1.05161	0.550073	0.453001	0.388287	0.258858	0.2438	0.3576		0.52123	10	1	0.52123	0.037779
Gulkana	Glacier	US (Alaska)	Alpha	0.975232	0.835913	1.11455	0.588235	0.897833	0.851393	0.959752	0.959752	0.913313	0.990712	1.06811	0.975232	0.975232	0.944272	1.13003	1.08359	0.990712	0.959752	0.897833	0.897833	1.05263	0.975232	0.696594	0.928793	0.866873	0.944272	0.712074	0.897833	0.804954	1.05263	0.882353	0.789474	1.02167	0.743034	0.866873	0.990712	0.820433	1.02167	0.866873	0.665635		0.866873	10	1	0.866873	0.022884
Leviy Aktru	Glacier	Russia	Alpha							1.08108	0.802621	0.737101	0.982801	0.933661	0.802621	1.09746	1.11384	0.999181	0.982801	1.01556	1.08108	0.950041	0.999181	0.753481	0.917281	1.17936	0.917281	1.09746	0.999181	0.982801	0.720721	0.982801	0.950041	0.950041	0.917281	0.917281	0.933661	1.01556	0.950041	0.933661		1.09746			0.964373	8	0.8	0.771499	0.0495111
Maliy Aktru	Glacier	Russia	Alpha	1.21381	1.09681	1.11144	0.321732	1.30155	1.31617	1.2723	0.555718	0.52647	1.16993	0.862825	0.497221	1.19918	1.22843	1.19918	1.03832	1.12606	1.21381	1.11144	1.06756	0.409476	0.979819	1.11144	0.979819	1.09681	0.994443	0.994443	0.394852	1.05294	0.892074	0.892074	0.731208	0.77508	0.921322	1.05294	0.87745	0.804329		1.19918			0.906698	8	0.8	0.725358	0.0292151
Midtre Lovenbreen	Glacier	Norway (Spitsbergen)	Alpha	0.681525	0.847302	1.06834	0.0368392	0.884141	0.534168	1.10518	0.534168	0.165776	0.552588	0.423651	1.14202	0.957819	0.386812	0.368392	0.773623	1.41831	0.497329	0.755204	0.349972	1.25253	0.736784	0	1.21569	0.110518	1.06834	0.663106	0.552588		0.663106	0.331553			0	0.092098	0.257874	0.47891	0.699945	0.534168	0.534168		0.36609	8	0.8	0.292872	0.0977253
No. 125 (Vodopadniy)	Glacier	Russia	Alpha							1.08124	0.847458	0.131502	0.891292	0.935126	0.321449	1.03741	1.08124	1.06663	1.03741	1.03741	1.12507	1.06663	1.06663	0.21917	1.05202	1.16891	0.993571	1.05202	0.993571	0.964348	0	1.03741	0.97896	1.00818	0.964348	0.935126	0.964348	1.03741	0.97896	0.97896		1.24196			1.01366	8	0.8	0.810929	0.0710732
Ts. Tuyuksuyskiy	Glacier	Russia	Alpha	0.741319	1.15099	0.741319	0.682794	0.663285	0.72181	0.624268	0.11705	0.48771	0.760827	1.13149	0.735466	0.458447	0.195084	0.819352	0.663285	0.780336	0.682794	0.72181	0.546235	0.429185	0.741319	1.56067	0.858369	0.60476	0.663285	0	0.877877	0.877877	0.994928	0.741319	0.682794	1.01444	0.819352	0.936403	0.429185	0.663285	0.429185	1.28755	1.07296		0.807647	10	1	0.807647	0.00847296
Urumqihe S. No. 1	Glacier	China	Alpha	1.02444	1.20417	0.557153	0.772825	1.22214	0.826743	1.16822	0.503235	0.593098	0.862689	0.521208	0.862689	1.02444	1.04242	0.53918	0.485262	0.880661	0.647017	1.1862	1.27606	0.557153	1.22214	1.24012	0.718907	0.916607	1.21316	0.440331	0.620058	0.584112	0.916607	0.709921	0.656003	0.871675	0.73688	0.916607	0.557153	0.575126	0.305536	1.15025	0		0.647915	10	1	0.647915	0.00458105
White	Glacier	Canada	Alpha	0.822529	1.19894	1.14318	0.961941	1.12923	1.11529	0.822529	0.934058	0.906176				0.989823	0.961941	1.05953	0.864352	0.125471	1.26865	1.25471	0.223059	0.697058	0.223059	0.167294	0.390353	0.641294	1.14318	0.906176	0.906176	0.557647	0.501882	0.711	1.11529	0.808588	1.04559	0.460059	0.850411	0.348529	0.292765	0.404294	0.808588		0.684511	10	1	0.684511	0.000966417
Wolverine	Glacier	US (Alaska)	Alpha	1.07462	0.590283	1.08975	0.635689	1.04435	0.80218	1.18057	1.05948	0.726502	1.36219	1.31679	0.96867	1.01408	0.96867	1.08975	0.983805	1.24111	1.28651	0.635689	0.484335	0.938399	0.983805	0.998941	0.938399	0.96867	0.696231	0.590283	1.10489	0.908128	1.07462	1.10489	0.938399	0.96867	0.560012	0.696231	0.938399	0.938399	1.18057	0.696231			0.891311	9	0.9	0.80218	0.0277872
Number of observations				9	9	9	9	9	9	11	11	11	10	10	10	11	11	11	11	11	11	11	11	11	11	11	11	11	11	11	11	10	11	11	9	9	11	11	11	11	8	11	7			SUM	9.9	7.08443	0.569517
Mean				0.871003	0.995746	1.00444	0.53702	0.972782	0.900938	0.996717	0.710673	0.575288	0.859569	0.804171	0.83903	0.974392	0.818032	0.846747	0.887264	1.02674	0.874079	0.879553	0.709126	0.719698	0.907064	0.812023	0.906719	0.749503	0.923432	0.663715	0.594925	0.765471	0.820246	0.705804	0.862835	0.884408	0.706892	0.693114	0.671283	0.648343	0.586646	0.82225	0.528767			Nf
Mean, 10-yr running average									0.842417	0.835734	0.820063	0.817058	0.845159	0.832556	0.831188	0.83419	0.850531	0.880958	0.865913	0.857466	0.864269	0.848032	0.856901	0.847177	0.850793	0.814491	0.786576	0.775168	0.78628	0.78489	0.780467	0.787706	0.767723	0.762084	0.736869	0.735332	0.734504	0.740182	0.711034								Mean	0.715599	0.252964
Std deviation				0.227696	0.276112	0.213953	0.331353	0.219231	0.363052	0.199817	0.309398	0.347768	0.295418	0.338368	0.263044	0.227084	0.389003	0.320977	0.261055	0.390687	0.348688	0.277281	0.379477	0.344284	0.296506	0.536507	0.210415	0.34787	0.226776	0.344983	0.362038	0.255451	0.238832	0.317512	0.155022	0.12281	0.378557	0.375197	0.321845	0.268319	0.350342	0.397178	0.358944					Std error	0.157578
Std error				0.0758986	0.0920372	0.0713177	0.110451	0.0730769	0.121017	0.0602471	0.0932869	0.104856	0.0934195	0.107001	0.0831818	0.0684685	0.117289	0.0967782	0.078711	0.117796	0.105133	0.0836035	0.114417	0.103805	0.0893998	0.161763	0.0634426	0.104887	0.0683755	0.104016	0.109159	0.0807808	0.0720104	0.0957334	0.051674	0.0409368	0.114139	0.113126	0.09704	0.0809013	0.123865	0.119754	0.135668				Mean pA	-0.284401
The trend for 1971-2010 is: y = -0.00528x + 0.910; r2 = 0.21; significant at the 1% level; standard error (intercept) = 0.0394 and (x-variable) = 0.0017
The trend for 1971-1990 is: y = -0.00095x + 0.864; r2 < 0.01; insignificant; standard error (intercept) = 0.0647 and (x-variable) = 0.0054
The trend for 1991-2010 is: y = -0.0096x + 0.85; r2 = 0.24; significant at the 1% level; standard error (intercept) = 0.125 and (x-variable) = 0.0040
[truncated: 4 more columns]

## Sheet: F. Regional mass balance (RGI)
Name	Glacier/ice cap	Country	Data to right	2001	2002	2003	2004	2005	2006	2007	2008	2009	2010		Mean mass balance 2001-10	Count Mn	f	Weighted mass balance	Variance calc.		Mean mass balance 2001-05	Count Mn	f	Weighted mass balance	Variance calc.		Mean mass balance 2006-10	Count Mn	f	Weighted mass balance	Variance calc.		Mean mass balance 2003-09	Count Mn	f	Weighted mass balance	Variance calc.
n=144
Alaska
Gulkana	Glacier	US (Alaska)	Mass balance (kg m-2 yr-1)	-612	-1016	-283	-2625	-705	-286	-1393	-118	-654	-1832		-952.4	10	1	-952.4	71111.1		-1048.2	5	1	-1048.2	30392.1		-856.6	5	1	-856.6	128881		-866.286	7	1	-866.286	8907.76
Lemon Creek	Glacier	US (Alaska)	Mass balance (kg m-2 yr-1)	400	-250	-1900	-650	-470	-170	150	800	-700	-580		-337	10	1	-337	121615		-574	5	1	-574	89920		-100	5	1	-100	158086		-420	7	1	-420	123837
McCall	Glacier	US (Alaska)	Mass balance (kg m-2 yr-1)
Wolverine	Glacier	US (Alaska)	Mass balance (kg m-2 yr-1)	206	-593	-404	-2367	-1839	-876	-821	880	-1779	-85		-767.8	10	1	-767.8	6734.94		-999.4	5	1	-999.4	15758.6		-536.2	5	1	-536.2	1489.96		-1029.43	7	1	-1029.43	66318.5
																Nf	3	-2057.2	199461			Nf	3	-2621.6	136071			Nf	3	-1492.8	288457			Nf	3	-2315.71	199063
																	Mean	-685.733	315.801				Mean	-873.867	260.836				Mean	-497.6	379.774				Mean	-771.905	315.486
																		Std error	182.328					Std error	150.594					Std error	219.263					Std error	182.146
																	Area	89051					Area	89051					Area	89051					Area	89051
																	Area fraction	0.121295					Area fraction	0.121295					Area fraction	0.12119					Area fraction	0.12119
Western Canada and US
Alexander	Glacier	Canada	Mass balance (kg m-2 yr-1)
Andrei	Glacier	Canada	Mass balance (kg m-2 yr-1)
Bench	Glacier	Canada	Mass balance (kg m-2 yr-1)
Blue	Glacier	US	Mass balance (kg m-2 yr-1)
Columbia (2057)	Glacier	US	Mass balance (kg m-2 yr-1)	-1520	600	-1170	-1830	-3210	-980	-370	960	-900	-210		-863	10	1	-863	15949.5		-1426	5	1	-1426	800.703		-300	5	1	-300	78893.1		-1071.43	7	1	-1071.43	9923.59
Daniels	Glacier	US	Mass balance (kg m-2 yr-1)	-1750	-180	-1520	-2130	-2900	1250	120	410	-1350	-260		-831	10	1	-831	25056.1		-1696	5	1	-1696	88980.9		34	5	1	34	378076		-874.286	7	1	-874.286	88066.5
Easton	Glacier	US	Mass balance (kg m-2 yr-1)	-1930	180	-980	-1060	-2450	790	260	450	-2060	680		-612	10	1	-612	142349		-1248	5	1	-1248	22411.1		24	5	1	24	365879		-721.429	7	1	-721.429	202156
Emmons	Glacier	US	Mass balance (kg m-2 yr-1)			-2822			-940	-430	-630	-1800			-1324.4	5	0.5	-662.2	56149		-2822	1	0.2	-564.4	405724		-950	4	0.8	-760	109000		-1324.4	5	0.714286	-946	16798.2
Foss	Glacier	US	Mass balance (kg m-2 yr-1)	-1920	100	-1350	-1940	-3120	-1020	-380	180	-2020	-110		-1158	10	1	-1158	28462.7		-1646	5	1	-1646	61651.3		-670	5	1	-670	7942.53		-1378.57	7	1	-1378.57	43066.9
Helm	Glacier	Canada	Mass balance (kg m-2 yr-1)	-600	-2544	-1895	-1995	-2765	-2750	-210	-2300	-510			-1729.89	9	0.9	-1556.9	493636		-1959.8	5	1	-1959.8	315953		-1442.5	4	0.8	-1154	593912		-1775	7	1	-1775	364761
Ice Worm	Glacier	US	Mass balance (kg m-2 yr-1)	-2150	50	-1400	-2000	-2850	-1350	-620	-100	-1560	-380		-1236	10	1	-1236	60865.2		-1670	5	1	-1670	74145.5		-802	5	1	-802	48894.4		-1411.43	7	1	-1411.43	57783.9
Lower Curtis	Glacier	US	Mass balance (kg m-2 yr-1)	-1880	130	-1250	-1510	-2750	-1060	-400	120	-2150	-440		-1119	10	1	-1119	16824.4		-1452	5	1	-1452	2948.13		-786	5	1	-786	42074.6		-1285.71	7	1	-1285.71	13148.9
Lynch	Glacier	US	Mass balance (kg m-2 yr-1)	-1820	-130	-1200	-1980	-2620	-1050	70	510	-1820	-340		-1038	10	1	-1038	2372.55		-1550	5	1	-1550	23194.3		-526	5	1	-526	3011.72		-1155.71	7	1	-1155.71	235.055
Noisy Creek	Glacier	US	Mass balance (kg m-2 yr-1)	-1326	462	-952	-1575	-2410	-320	-360	-290	-1190	-180		-814.1	10	1	-814.1	30692		-1160.2	5	1	-1160.2	56407.8		-468	5	1	-468	12741.7		-1013.86	7	1	-1013.86	24708.3
North Klawatti	Glacier	US	Mass balance (kg m-2 yr-1)	-1767	224	-1367	-1272	-2060	-1140	-740	-220	-1830	250		-992.2	10	1	-992.2	8.46107		-1248.4	5	1	-1248.4	22291.5		-736	5	1	-736	24062.5		-1232.71	7	1	-1232.71	3803
Peyto	Glacier	Canada	Mass balance (kg m-2 yr-1)	-920	-500	-1370	-550	-810	-1650	-1850	-230	-1020			-988.889	9	0.9	-890	0.145675		-830	5	1	-830	322287		-1187.5	4	0.8	-950	294391		-1068.57	7	1	-1068.57	10501
Place	Glacier	Canada	Mass balance (kg m-2 yr-1)	-760	-123	-995	-2210	-1295	-1900	-150	-490	-1500			-1047	9	0.9	-942.3	2997.27		-1076.6	5	1	-1076.6	103107		-1010	4	0.8	-808	147316		-1220	7	1	-1220	2396.51
Rainbow	Glacier	US	Mass balance (kg m-2 yr-1)	-1710	120	-980	-1670	-2650	-610	290	650	-1980	760		-778	10	1	-778	44644		-1378	5	1	-1378	388.22		-178	5	1	-178	162312		-992.857	7	1	-992.857	31751.2
Ram River	Glacier	Canada	Mass balance (kg m-2 yr-1)
Sandalee	Glacier	US	Mass balance (kg m-2 yr-1)	-898	752	-1155	-1232	-2293	-400	-60	-140	-650	240		-583.6	10	1	-583.6	164585		-965.2	5	1	-965.2	187059		-202	5	1	-202	143549		-847.143	7	1	-847.143	104913
Sentinel	Glacier	Canada	Mass balance (kg m-2 yr-1)
Sholes	Glacier	US	Mass balance (kg m-2 yr-1)	-1830	210	-1120	-1860	-2840	-710	290	200	-2680	940		-940	10	1	-940	2429.62		-1488	5	1	-1488	8153.49		-392	5	1	-392	35675.3		-1245.71	7	1	-1245.71	5575.38
Silver	Glacier	US	Mass balance (kg m-2 yr-1)	-1227	-147	-1421	-563	-1490	-1010	-650	260	-1990	550		-768.8	10	1	-768.8	48616.4		-969.6	5	1	-969.6	183272		-568	5	1	-568	165.872		-980.571	7	1	-980.571	36280.5
South Cascade	Glacier	US	Mass balance (kg m-2 yr-1)	-1570	550	-2100	-1650	-2450	-1450	-210	-290	-1860	-810		-1184	10	1	-1184	37911.5		-1444	5	1	-1444	2143.38		-924	5	1	-924	117732		-1430	7	1	-1430	67057.3
Watson	Glacier	US	Mass balance (kg m-2 yr-1)
Woolsey	Glacier	Canada	Mass balance (kg m-2 yr-1)
Yawning	Glacier	US	Mass balance (kg m-2 yr-1)	-1940	260	-1850	-1780	-3020	-930	-130	480	-1620	170		-1036	10	1	-1036	2181.71		-1666	5	1	-1666	71983.1		-406	5	1	-406	30582.7		-1264.29	7	1	-1264.29	8693.68
Yuri	Glacier	Canada	Mass balance (kg m-2 yr-1)
Zavisha	Glacier	Canada	Mass balance (kg m-2 yr-1)
																Nf	18.2	-18005.1	1.17573e+06			Nf	18.2	-25438.2	1.9529e+06			Nf	18.2	-10572	2.59621e+06			Nf	18.7143	-21915.3	1.09162e+06
																	Mean	-989.291	261.451				Mean	-1397.7	336.958				Mean	-580.879	388.513				Mean	-1171.05	248.241
																		Std error	61.285					Std error	78.9842					Std error	91.0689					Std error	57.3835
																	Area	14505					Area	14505					Area	14505					Area	14505
																	Area fraction	0.0197571					Area fraction	0.0197571					Area fraction	0.0197399					Area fraction	0.0197399
Arctic Canada
Baby	Glacier	Canada	Mass balance (kg m-2 yr-1)	-100	293	-334		-370							-127.75	4	0.4	-51.1	8717.26		-127.75	4	0.8	-102.2	854.311								-352	2	0.285714	-100.571	20.0402
Devon NW	Ice cap	Canada	Mass balance (kg m-2 yr-1)	-559	-21	-139	46	-262	-242	-291	-394	-523	-417		-280.2	10	1	-280.2	23.2806		-187	5	1	-187	706.041		-373.4	5	1	-373.4	3956.41		-257.857	7	1	-257.857	7356.13
White	Glacier	Canada	Mass balance (kg m-2 yr-1)	-151	32	-106	37	-612	-93	-818	-817	-580	-188		-329.6	10	1	-329.6	2940.35		-160	5	1	-160	0.183673		-499.2	5	1	-499.2	3956.41		-427	7	1	-427	6951.39
Hidden	Glacier	Canada	Mass balance (kg m-2 yr-1)
Minaret	Glacier	Canada	Mass balance (kg m-2 yr-1)
Superguksoak	Glacier	Canada	Mass balance (kg m-2 yr-1)
																Nf	2.4	-660.9	11680.9			Nf	2.8	-449.2	1560.54			Nf	2	-872.6	7912.82			Nf	2.28571	-785.429	14327.6
																	Mean	-275.375	91.3427				Mean	-160.429	29.4443				Mean	-436.3	88.954				Mean	-343.625	105.564
																		Std error	58.9615					Std error	17.5963					Std error	62.9					Std error	69.8237
																	Area	145887					Area	145887					Area	145887					Area	145887
																	Area fraction	0.198711					Area fraction	0.198538					Area fraction	0.198538					Area fraction	0.198538
Greenland
Mittivakkat	Glacier	Greenland	Mass balance (kg m-2 yr-1)	-960	-500	340	-1070	-1820	-580	-1580	-520	-1010	-2160		-986		Mean	-986			-802		Mean	-802			-1170		Mean	-1170			-891.429		Mean	-891.429
																	Area	87810	10				Area	87810	5				Area	87810	5				Area	87810	7
																	Area fraction	0.119501	731.166				Area fraction	0.119605	795.06				Area fraction	0.119501	697.209				Area fraction	0.119501	722.69
																		Std error	231.215					Std error	355.562					Std error	311.801					Std error	273.151
Iceland
Breidamjok. E.B.	Ice cap	Iceland	Mass balance (kg m-2 yr-1)	-1100	-863	-775	-1330	-1530							-1119.6	5	0.5	-559.8	1621.12		-1119.6	5	1	-1119.6	3451.82								-1211.67	3	0.428571	-519.286	43931.4
Bruarjokull	Ice cap	Iceland	Mass balance (kg m-2 yr-1)	140	52	-568	-800	-1557	-790	-536	-503	-122	-1570		-625.4	10	1	-625.4	191196		-546.6	5	1	-546.6	264451		-704.2	5	1	-704.2	129824		-696.571	7	1	-696.571	37997.1
Dyngjujokull	Ice cap outlet	Iceland	Mass balance (kg m-2 yr-1)					-1327	-353	95	-24	227	-1540		-487	6	0.6	-292.2	198830		-1327	1	0.2	-265.4	14167.4		-319	5	1	-319	555787		-276.4	5	0.714286	-197.429	270249
Eyjabakkajokull	Ice cap	Iceland	Mass balance (kg m-2 yr-1)	286	-1093	-1094	-1310	-2202	-1425	-636	-1282	-507	-1750		-1101.3	10	1	-1101.3	1493.1		-1082.6	5	1	-1082.6	473.157		-1120	5	1	-1120	3079.02		-1208	7	1	-1208	100172
Hofsjokull E (Thjorsarjokull)	Ice cap outlet	Iceland	Mass balance (kg m-2 yr-1)	-1550	-730	-1310	-1630	-20	-490	-870	-790	-170	-2830		-1039	10	1	-1039	559.764		-1048	5	1	-1048	165.067		-1030	5	1	-1030	1191.02		-754.286	7	1	-754.286	18827.8
Hofsjokull N (Satujokull)	Ice cap outlet	Iceland	Mass balance (kg m-2 yr-1)	-580	-1000	-980	-1360	-430	-510	-870	-570	-350	-2400		-905	10	1	-905	24856.5		-870	5	1	-870	36422.9		-940	5	1	-940	15503		-724.286	7	1	-724.286	27960.6
Hofsjokull SW (Blagnipujokull)	Ice cap	Iceland	Mass balance (kg m-2 yr-1)	-1890	-640	-1170	-1500	-580	-610	-860	-930	-350	-3490		-1202	10	1	-1202	19415.8		-1156	5	1	-1156	9053.94		-1248	5	1	-1248	33668.2		-857.143	7	1	-857.143	1180.41
Koeldukvislarj kull	Ice cap	Iceland	Mass balance (kg m-2 yr-1)	-818	-227	-1075	-776	-627	-402	-342	-587	-134	-2870		-785.8	10	1	-785.8	76651.1		-704.6	5	1	-704.6	126913		-867	5	1	-867	39010.6		-563.286	7	1	-563.286	107725
Langjokull S. Dome	Ice cap	Iceland	Mass balance (kg m-2 yr-1)	-1271	-1656	-1946	-1487	-894	-1080	-1412	-1842	-362	-3800		-1575	10	1	-1575	262493		-1450.8	5	1	-1450.8	152063		-1699.2	5	1	-1699.2	402830		-1289	7	1	-1289	158006
Tungnaarjokull	Ice cap	Iceland	Mass balance (kg m-2 yr-1)	-1629	-1276	-1220	-1699	-1757	-1569	-997	-1340	-809	-3551		-1584.7	10	1	-1584.7	272526		-1516.2	5	1	-1516.2	207346		-1653.2	5	1	-1653.2	346555		-1341.57	7	1	-1341.57	202564
																Nf	9.1	-9670.2	1.04964e+06			Nf	9.2	-9759.8	814506			Nf	9	-9580.6	1.52745e+06			Nf	9.14286	-8150.86	968613
																	Mean	-1062.66	359.98				Mean	-1060.85	315.167				Mean	-1064.51	436.956				Mean	-891.5	344.895
																		Std error	119.332					Std error	103.907					Std error	145.652					Std error	114.063
																	Area	11058					Area	11058					Area	11058					Area	11058
																	Area fraction	0.0150619					Area fraction	0.0150619					Area fraction	0.0150488					Area fraction	0.0150488
Svalbard
Austre Broggerbreen	Glacier	Norway (Svalbard)	Mass balance (kg m-2 yr-1)	-480	-580	-900	-1120	-1000	-730	-460	-130	-246	-440		-608.6	10	1	-608.6	18957.9		-816	5	1	-816	31146.2		-401.2	5	1	-401.2	11007		-655.143	7	1	-655.143	31110.2
Hansbreen	Ice cap	Norway (Svalbard)	Mass balance (kg m-2 yr-1)	-1100	-606	-569	-577	47	93	-4	149	-844	-14		-342.5	10	1	-342.5	16489.7		-561	5	1	-561	6164.96		-124	5	1	-124	29682.4		-243.571	7	1	-243.571	55314.6
Irenebreen	Glacier	Norway (Svalbard)	Mass balance (kg m-2 yr-1)		-613	-630	-605	-862	-822	-695	-357	-630			-651.75	8	0.8	-521.4	26161.8		-677.5	4	0.8	-542	1154.15		-626	4	0.8	-500.8	86969.2		-657.286	7	1	-657.286	31870.8
Kongsvegen	Ice cap	Norway (Svalbard)	Mass balance (kg m-2 yr-1)	-480	-220	-350	-740	-440	20	-90	418	-78	130		-183	10	1	-183	82893.5		-446	5	1	-446	37448.9		80	5	1	80	141591		-180	7	1	-180	89258.7
Midtre Lovenbreen	Glacier	Norway (Svalbard)	Mass balance (kg m-2 yr-1)	-330	-520	-790	-970	-740	-480	-250	-9	-138	-200		-442.7	10	1	-442.7	795.933		-670	5	1	-670	929.199		-215.4	5	1	-215.4	6542.5		-482.429	7	1	-482.429	13.4444
Waldemarbreen	Glacier	Norway (Svalbard)	Mass balance (kg m-2 yr-1)	-767	-514	-727	-641	-722	-747	-771	-322	-649			-651.111	9	0.9	-586	29224.5		-674.2	5	1	-674.2	1202.89		-622.25	4	0.8	-497.8	85002.2		-654.143	7	1	-654.143	30758.5
																Nf	5.7	-2684.2	174523			Nf	5.8	-3709.2	78046.3			Nf	5.6	-1659.2	360794			Nf	6	-2872.57	238326
																	Mean	-470.912	192.698				Mean	-639.517	127.513				Mean	-296.286	280.06				Mean	-478.762	218.324
																		Std error	80.7124					Std error	52.947					Std error	118.347					Std error	89.1303
																	Area	33837					Area	33837					Area	33837					Area	33837
																	Area fraction	0.0460889					Area fraction	0.0460889					Area fraction	0.0460488					Area fraction	0.0460488
Scandinavia
Aalfotbreen	Ice cap outlet	Norway	Mass balance (kg m-2 yr-1)	-2093	-1530	-2502	-100	668	-3190	1270	680	-170	-1840		-880.7	10	1	-880.7	2938.95		-1111.4	5	1	-1111.4	45284.9		-650	5	1	-650	11256.2		-477.714	7	1	-477.714	34105.1
Austdalsbreen	Ice cap	Norway	Mass balance (kg m-2 yr-1)	-1620	-2010	-2340	-960	190	-2060	180	-70	-700	-2000		-1139	10	1	-1139	97663.8		-1348	5	1	-1348	201963		-930	5	1	-930	30242.9		-822.857	7	1	-822.857	25749.8
Bondhusbreen	Glacier	Norway	Mass balance (kg m-2 yr-1)
Breidalblikkbrea	Glacier	Norway	Mass balance (kg m-2 yr-1)			-2260	-940	-280	-2940	430	-300	-520	-1940		-1093.75	8	0.8	-875	57143.2		-1160	3	0.6	-696	40998.7		-1054	5	1	-1054	88747.2		-972.857	7	1	-972.857	96390
Engabreen	Ice cap	Norway	Mass balance (kg m-2 yr-1)	-1530	-557	-584	817	897	-1430	1030	310	-30	-520		-159.7	10	1	-159.7	444606		-191.4	5	1	-191.4	500128		-128	5	1	-128	394504		144.286	7	1	144.286	650725
Graafjellsbrea	Glacier	Norway	Mass balance (kg m-2 yr-1)			-2170	-820	10	-3040	780	-140	-540	-1840		-970	8	0.8	-776	16476.6		-993.333	3	0.6	-596	5384.92		-956	5	1	-956	39961.9		-845.714	7	1	-845.714	33607.9
Graasubreen	Glacier	Norway	Mass balance (kg m-2 yr-1)	24	-1415	-1394	-492	-493	-2080	-710	80	-280	-1060		-782	10	1	-782	1979.18		-754	5	1	-754	20908.5		-810	5	1	-810	2905.72		-767	7	1	-767	10943.3
Hansebreen	Glacier	Norway	Mass balance (kg m-2 yr-1)	-2720	-1930	-2670	-500	-90	-3980	840	260	-970	-2220		-1398	10	1	-1398	326626		-1582	5	1	-1582	467039		-1214	5	1	-1214	209677		-1015.71	7	1	-1015.71	124838
Hardangerjokulen	Ice cap	Norway	Mass balance (kg m-2 yr-1)	-845	-708	-1364	80	723	-2220	1170	450	150	-1490		-405.4	10	1	-405.4	177315		-422.8	5	1	-422.8	226383		-388	5	1	-388	135494		-144.429	7	1	-144.429	268284
Hellstugubreen	Glacier	Norway	Mass balance (kg m-2 yr-1)	-364	-1415	-1528	-843	-287	-2010	-670	-60	-230	-1340		-874.7	10	1	-874.7	2324.4		-887.4	5	1	-887.4	125.385		-862	5	1	-862	11215.8		-804	7	1	-804	20053.4
Hoegtuvbreen	Glacier	Norway	Mass balance (kg m-2 yr-1)
Jostefonn	Glacier	Norway	Mass balance (kg m-2 yr-1)
Karsojietna	Glacier	Sweden	Mass balance (kg m-2 yr-1)
Langfjordjokelen	Glacier	Norway	Mass balance (kg m-2 yr-1)	-2280	-1540	-1070	-1920	-1250	-2410	-810	-350	-1320	-760		-1371	10	1	-1371	296493		-1612	5	1	-1612	508943		-1130	5	1	-1130	139805		-1304.29	7	1	-1304.29	412030
Maarmaglaciaren	Glacier	Sweden	Mass balance (kg m-2 yr-1)	-410	-660	-1420	-580	-790	-1650	-530	120	-1390	-500		-781	10	1	-781	2069.15		-772	5	1	-772	16026.9		-790	5	1	-790	1149.53		-891.429	7	1	-891.429	52458.7
Nigardsbreen	Ice cap	Norway	Mass balance (kg m-2 yr-1)	-219	-888	-1159	-43	1098	-1399	1047	1100	240	-800		-102.3	10	1	-102.3	524448		-242.2	5	1	-242.2	430858		37.6	5	1	37.6	629952		126.286	7	1	126.286	622009
Rabots Glaciar	Glacier	Sweden	Mass balance (kg m-2 yr-1)	-760	-879	-1440		-1170	-1630		350	-500	-1080		-888.625	8	0.8	-710.9	3088.81		-1062.25	4	0.8	-849.8	21425.7		-715	4	0.8	-572	1351.05		-878	5	0.714286	-627.143	33205.5
Riukojietna	Ice cap	Sweden	Mass balance (kg m-2 yr-1)	-1730	-1830	-1780		-350	-1400	-960	-590	-720	-960		-1146.67	9	0.9	-1032	92263		-1422.5	4	0.8	-1138	219579		-926	5	1	-926	28867.6		-966.667	6	0.857143	-828.571	79358.1
Spoerteggbreen	Glacier	Norway	Mass balance (kg m-2 yr-1)
Storbreen	Glacier	Norway	Mass balance (kg m-2 yr-1)	-570	-1786	-1566	-585	-63	-2150	-390	110	-220	-1760		-898	10	1	-898	5113.97		-914	5	1	-914	237.235		-882	5	1	-882	15852		-694.857	7	1	-694.857	1054.13
Storglaciaren	Glacier	Sweden	Mass balance (kg m-2 yr-1)	-700	-830	-1040	-120	-70	-1720	410	580	-530	-690		-471	10	1	-471	126372		-552	5	1	-552	120130		-390	5	1	-390	134026		-355.714	7	1	-355.714	94049.9
Storglombreen	Glacier	Norway	Mass balance (kg m-2 yr-1)	-1760	-1250	-1100	110	330							-734	5	0.5	-367	4277.01		-734	5	1	-734	27092.4								-220	3	0.428571	-94.2857	83875.2
Storsteinsfjellbreen	Glacier	Norway	Mass balance (kg m-2 yr-1)
Svartisheibreen	Glacier	Norway	Mass balance (kg m-2 yr-1)
Tarfalaglaciaren	Glacier	Sweden	Mass balance (kg m-2 yr-1)	-370			-380	-920	-2530	210	-200	-1710	-1060		-870	8	0.8	-696	1514.64		-556.667	3	0.6	-334	70150		-1058	5	1	-1058	91146.5		-921.667	6	0.857143	-790	57621
Trollbergdalsbreen	Glacier	Norway	Mass balance (kg m-2 yr-1)
																Nf	16.6	-13719.7	2.18271e+06			Nf	16.4	-14737	2.92266e+06			Nf	16.8	-12702.4	1.96615e+06			Nf	16.8571	-11166	2.70036e+06
																	Mean	-826.488	374.055				Mean	-898.598	435.641				Mean	-756.095	352.761				Mean	-662.39	412.666
																		Std error	91.8083					Std error	107.574					Std error	86.0648					Std error	100.509
																	Area	2852					Area	2852					Area	2852					Area	2852
																	Area fraction	0.00388467					Area fraction	0.00388467					Area fraction	0.00388129					Area fraction	0.00388129
Russian Arctic
No. 104	Glacier	Russia	Mass balance (kg m-2 yr-1)														Mean	-470.912	(Russian Arctic = Svalbard)				Mean	-639.517	(Russian Arctic = Svalbard)				Mean	-296.286	(Russian Arctic = Svalbard)				Mean	-478.762	(Russian Arctic = Svalbard)
																	Area	51784					Area	51784					Area	51784					Area	51784
																	Area fraction	0.0705343					Area fraction	0.0705343					Area fraction	0.0704729					Area fraction	0.0704729
North Asia																		Std error	80.7124					Std error	52.947					Std error	118.347					Std error	89.1303
IGAN	Glacier	Russia	Mass balance (kg m-2 yr-1)
Koryto	Glacier	Russia	Mass balance (kg m-2 yr-1)
Kozelskiy	Glacier	Russia	Mass balance (kg m-2 yr-1)
Mutnovskiy NE	Glacier	Russia	Mass balance (kg m-2 yr-1)
Mutnovskiy SW	Glacier	Russia	Mass balance (kg m-2 yr-1)
Obrucheva	Glacier	Russia	Mass balance (kg m-2 yr-1)
Central Europe
Basodino	Glacier	Switz.	Mass balance (kg m-2 yr-1)	591	-356	-2043	-490	-1172	-2501	-902	-1168	130	-584		-849.5	10	1	-849.5	3097.77		-694	5	1	-694	23849.7		-1005	5	1	-1005	2073.16		-1163.71	7	1	-1163.71	4687.1
Calderone	Glacier	Italy	Mass balance (kg m-2 yr-1)	-511	-1847	-264	252	-194	1090	-2320	275	401	702		-241.6	10	1	-241.6	440309		-512.8	5	1	-512.8	112650		29.6	5	1	29.6	978256		-108.571	7	1	-108.571	973538
Careser	Glacier	Italy	Mass balance (kg m-2 yr-1)	-250	-1149	-3317	-1562	-2005	-2093	-2745	-1851	-1236	-962		-1717	10	1	-1717	659088		-1656.6	5	1	-1656.6	653133		-1777.4	5	1	-1777.4	669013		-2115.57	7	1	-2115.57	1.04105e+06
Ciardoney	Glacier	Italy	Mass balance (kg m-2 yr-1)	160	-400	-3000	-1060	-2230	-2099	-1490	-1510	-490	-830		-1294.9	10	1	-1294.9	151899		-1306	5	1	-1306	209367		-1283.8	5	1	-1283.8	105191		-1697	7	1	-1697	362101
Filleck K.	Glacier	Austria	Mass balance (kg m-2 yr-1)
Findelen	Glacier	Switz.	Mass balance (kg m-2 yr-1)					-200	-1200	-200	-300	100	-470		-378.333	6	0.6	-227	166526		-200	1	0.2	-40	84093.2		-414	5	1	-414	297535		-360	5	0.714286	-257.143	386140
Fontana Bianca	Glacier	Italy	Mass balance (kg m-2 yr-1)	395	-435	-2950	-994	-1471	-1753	-1607	-1246	-622			-1187	9	0.9	-1068.3	71491.6		-1091	5	1	-1091	58838.6		-1307	4	0.8	-1045.6	96622.7		-1520.43	7	1	-1520.43	180775
Goldbergkees	Glacier	Austria	Mass balance (kg m-2 yr-1)	-388	-612	-1806	137	-260	-1077	-1106	-651	-542	-216		-652.1	10	1	-652.1	64038.2		-585.8	5	1	-585.8	68976.3		-718.4	5	1	-718.4	58113.8		-757.857	7	1	-757.857	113835
Gries	Glacier	Switz.	Mass balance (kg m-2 yr-1)	-229	-990	-2711	-1146	-1512	-1995	-1473	-1601	-883	-1307		-1384.7	10	1	-1384.7	229961		-1317.6	5	1	-1317.6	220117		-1451.8	5	1	-1451.8	242391		-1617.29	7	1	-1617.29	272519
Hintereisferner	Glacier	Austria	Mass balance (kg m-2 yr-1)	-173	-647	-1814	-667	-1061	-1516	-1797	-1235	-1182	-1419		-1151.1	10	1	-1151.1	60487.7		-872.4	5	1	-872.4	574.401		-1429.8	5	1	-1429.8	221212		-1324.57	7	1	-1324.57	52587.4
Jamtalferner	Glacier	Austria	Mass balance (kg m-2 yr-1)	-62	-671	-2229	-228	-975	-1293	-1438	-981	-953	-1434		-1026.4	10	1	-1026.4	14699.7		-833	5	1	-833	238.188		-1219.8	5	1	-1219.8	67772.7		-1156.71	7	1	-1156.71	3777.62
Kesselwandferner	Glacier	Austria	Mass balance (kg m-2 yr-1)	525	17	-1546	-188	-59	-617	-837	-444	-795	-670		-461.4	10	1	-461.4	196921		-250.2	5	1	-250.2	357883		-672.6	5	1	-672.6	82293.3		-640.857	7	1	-640.857	206475
Kleinfleisskees	Glacier	Austria	Mass balance (kg m-2 yr-1)	-195	-808	-1442	125	-111	-655	-946	-623	-403	-758		-581.6	10	1	-581.6	104690		-486.2	5	1	-486.2	131213		-677	5	1	-677	79788.2		-579.286	7	1	-579.286	266221
Limmern	Glacier	Switz.	Mass balance (kg m-2 yr-1)
Maladeta	Glacier	Spain	Mass balance (kg m-2 yr-1)	502	-811	-1102	-1516	-1479	-1787	-947	-38	-1415	259		-833.4	10	1	-833.4	5149.15		-881.2	5	1	-881.2	1073.65		-785.6	5	1	-785.6	30230.1		-1183.43	7	1	-1183.43	7775.12
Malavalle	Glacier	Italy	Mass balance (kg m-2 yr-1)		-909	-1461	-208	-800	-1322	-1358	-900	-517	-197		-852.444	9	0.9	-767.2	2500.81		-844.5	4	0.8	-675.6	12.3769		-858.8	5	1	-858.8	10134.1		-938	7	1	-938	24728.2
Ochsentaler	Glacier	Switz.	Mass balance (kg m-2 yr-1)
Pendente	Glacier	Italy	Mass balance (kg m-2 yr-1)	49	-1323	-2122	-429	-1372	-1687	-2154	-1484	-844	-134		-1150	10	1	-1150	59947.8		-1039.4	5	1	-1039.4	36468.3		-1260.6	5	1	-1260.6	90680.4		-1441.71	7	1	-1441.71	120036
Plattalva	Glacier	Switz.	Mass balance (kg m-2 yr-1)
Rhone	Glacier	Switz.	Mass balance (kg m-2 yr-1)
Sforzellina	Glacier	Italy	Mass balance (kg m-2 yr-1)
Silvretta	Glacier	Switz.	Mass balance (kg m-2 yr-1)	673	-298	-2529	-120	-1050	-1449	-916	-639	-1097	-268		-769.3	10	1	-769.3	18457.3		-664.8	5	1	-664.8	33721.2		-873.8	5	1	-873.8	7339.02		-1114.29	7	1	-1114.29	362.286
Sonnblickkees	Glacier	Austria	Mass balance (kg m-2 yr-1)	-399	-485	-2870	8	-323	-621	-2175	-777	-254	-792		-868.8	10	1	-868.8	1321.88		-813.8	5	1	-813.8	1199.47		-923.8	5	1	-923.8	1272.21		-1001.71	7	1	-1001.71	8749.29
Vermuntgl.	Glacier	Austria	Mass balance (kg m-2 yr-1)
Vernagtferner	Glacier	Austria	Mass balance (kg m-2 yr-1)	-224	-266	-2133	-407	-523	-882	-966	-843	-959	-680		-788.3	10	1	-788.3	13655.7		-710.6	5	1	-710.6	18998		-866	5	1	-866	8736.28		-959	7	1	-959	18564.6
Wurtenkees	Glacier	Austria	Mass balance (kg m-2 yr-1)	-300	-966	-2177	-313	-448	-778	-1200	-938	-584	-519		-822.3	10	1	-822.3	6865.38		-840.8	5	1	-840.8	58.2678		-803.8	5	1	-803.8	24232.6		-919.714	7	1	-919.714	30813.5
																Nf	18.4	-16654.9	2.27111e+06			Nf	18	-15271.8	2.01247e+06			Nf	18.8	-18038	3.07289e+06			Nf	18.7143	-20496.9	4.07474e+06
																	Mean	-905.158	361.28				Mean	-848.433	344.064				Mean	-959.468	415.493				Mean	-1095.25	479.61
																		Std error	84.2239					Std error	81.0968					Std error	95.8262					Std error	110.867
																	Area	2061					Area	2061					Area	2061					Area	2061
																	Area fraction	0.00280726					Area fraction	0.00280726					Area fraction	0.00280482					Area fraction	0.00280482
Caucasus
Djankuat	Glacier	Russia	Mass balance (kg m-2 yr-1)	-620	430	280	730	390	-800	-2010	100	-120	-600		-222	10	1	-222	2415.72		242	5	1	242	11881		-686	5	1	-686	114.49		-204.286	7	1	-204.286	9.43367
Garabashi	Glacier	Russia	Mass balance (kg m-2 yr-1)	-750	260	160	250	200	-656	-633	-423	-371	-1240		-320.3	10	1	-320.3	2415.72		24	5	1	24	11881		-664.6	5	1	-664.6	114.49		-210.429	7	1	-210.429	9.43367
Marukh	Glacier	Russia	Mass balance (kg m-2 yr-1)
																Nf	2	-542.3	4831.45			Nf	2	266	23762			Nf	2	-1350.6	228.98			Nf	2	-414.714	18.8673
																	Mean	-271.15	69.5086				Mean	133	154.149				Mean	-675.3	15.1321				Mean	-207.357	4.34366
																		Std error	49.15					Std error	109					Std error	10.7					Std error	3.07143
																	Area	1100					Area	1100					Area	1100					Area	1100
																	Area fraction	0.00149829					Area fraction	0.00149829					Area fraction	0.00149699					Area fraction	0.00149699
Central Asia
Leviy Aktru	Glacier	Russia	Mass balance (kg m-2 yr-1)	-240	-370	-400	-260	40	-190	-320	-810	470			-231.111	9	0.9	-208	84816		-246	5	1	-246	106662		-212.5	4	0.8	-170	61901.4		-210	7	1	-210	85175.7
Maliy Aktru	Glacier	Russia	Mass balance (kg m-2 yr-1)	-190	-410	-370	-150	160	-140	-300	-870	590			-186.667	9	0.9	-168	111153		-192	5	1	-192	144849		-180	4	0.8	-144	77211		-154.286	7	1	-154.286	120800
No. 125 (Vodopadniy)	Glacier	Russia	Mass balance (kg m-2 yr-1)	-140	-290	-320	-220	60	-260	-270	-720	380			-197.778	9	0.9	-178	104235		-182	5	1	-182	152561		-217.5	4	0.8	-174	59696		-192.857	7	1	-192.857	95475.9
Praviy Aktru	Glacier	Russia	Mass balance (kg m-2 yr-1)
Golubin	Glacier	Kirgizstan	Mass balance (kg m-2 yr-1)
Sary-Tor	Glacier	Kirgizstan	Mass balance (kg m-2 yr-1)
Urumqihe S. No. 1	Glacier	China	Mass balance (kg m-2 yr-1)	-1159	-1264	-622	-775	-491.5	-713	-619	-931	63	-1327		-783.85	10	1	-783.85	60394.8		-862.3	5	1	-862.3	83931.4		-705.4	5	1	-705.4	46110.4		-584.071	7	1	-584.071	6760.55
Xiaodongkemadi	Glacier	China	Mass balance (kg m-2 yr-1)
No. 356	Glacier	Russia	Mass balance (kg m-2 yr-1)
Shumskiy	Glacier	Russia	Mass balance (kg m-2 yr-1)
Suyok Zapadniy	Glacier	Russia	Mass balance (kg m-2 yr-1)
Ts. Tuyuksuyskiy	Glacier	Russia	Mass balance (kg m-2 yr-1)	-555	-302	359	62	-340	-969	-915	-1357	206	30		-378.1	10	1	-378.1	25598.9		-155.2	5	1	-155.2	174215		-601	5	1	-601	12173.4		-422	7	1	-422	6375.84
Abramov	Glacier	Kirgizstan	Mass balance (kg m-2 yr-1)
Chhota Shigri	Glacier	India	Mass balance (kg m-2 yr-1)			-1416	-1227	144	-1413						-978	4	0.4	-391.2	77406		-833	3	0.6	-499.8	40687.7		-1413	1	0.2	-282.6	170140		-978	4	0.571429	-558.857	129554
Hamtah	Glacier	India	Mass balance (kg m-2 yr-1)	-1654	-1221	-1621	-1857	-1856	-1391						-1600	6	0.6	-960	676583		-1641.8	5	1	-1641.8	1.14321e+06		-1391	1	0.2	-278.2	162120		-1681.25	4	0.571429	-960.714	794850
Shaune Garang	Glacier	India	Mass balance (kg m-2 yr-1)
																Nf	5.7	-3067.15	1.14019e+06			Nf	6.6	-3779.1	1.84611e+06			Nf	4.8	-2355.2	589352			Nf	6.14286	-3082.79	1.23899e+06
																	Mean	-538.096	492.537				Mean	-572.591	574.163				Mean	-490.667	393.818				Mean	-501.849	490.831
																		Std error	206.301					Std error	223.493					Std error	179.753					Std error	198.037
																	Area	123604					Area	123604					Area	123604					Area	123604
																	Area fraction	0.168359					Area fraction	0.168359					Area fraction	0.168213					Area fraction	0.168213
Northern Andes
Antizana15Alpha	Glacier	Equador	Mass balance (kg m-2 yr-1)	-598	-1038	-1366	-604	-1216	-203	-904	337	-828	-938		-735.8	10	1	-735.8	9774.62		-964.4	5	1	-964.4	8227.89		-507.2	5	1	-507.2	91264.4		-683.429	7	1	-683.429	4346.95
Charquini Sur	Glacier	Bolivia	Mass balance (kg m-2 yr-1)			-884	-1486	-2499	-376	-482	161	-1616	-2921		-1262.88	8	0.8	-1010.3	146690		-1623	3	0.6	-973.8	336877		-1046.8	5	1	-1046.8	56406.2		-1026	7	1	-1026	76529.7
La Conejera	Glacier	Colombia	Mass balance (kg m-2 yr-1)						-1936	-995	1557	-2484	-3075		-1386.6	5	0.5	-693.3	152315								-1386.6	5	1	-1386.6	333275		-964.5	4	0.571429	-551.143	26448.7
Zongo	Glacier	Bolivia	Mass balance (kg m-2 yr-1)	557	-58	-86	-521	-1559	-197	-173	257	-631	-739		-315	10	1	-315	270053		-333.4	5	1	-333.4	291916		-296.6	5	1	-296.6	262861		-415.714	7	1	-415.714	111319
																Nf	3.3	-2754.4	578833			Nf	2.6	-2271.6	637021			Nf	4	-3237.2	743807			Nf	3.57143	-2676.29	218645
																	Mean	-834.667	501.664				Mean	-873.692	630.982				Mean	-809.3	497.931				Mean	-749.36	291.597
																		Std error	276.157					Std error	391.318					Std error	248.966					Std error	154.298
																	Area	4040					Area	4040					Area	4040					Area	4040
																	Area fraction	0.00550283					Area fraction	0.00550283					Area fraction	0.00549804					Area fraction	0.00549804
Southern Andes
Martial Este	Glacier	Argentina	Mass balance (kg m-2 yr-1)	785	-682	-202	-1318	-991	-513	99	-56	-119	930		-206.7		Mean	-206.7			-481.6		Mean	-481.6			68.2		Mean	68.2			-442.857		Mean	-442.857
																	Area	32547	10				Area	32547	5				Area	32547	5				Area	32547	7
																	Area fraction	0.0443318	712.529				Area fraction	0.0443318	818.79				Area fraction	0.0443318	531.956				Area fraction	0.0443318	528.744
																		Std error	225.321					Std error	366.174					Std error	237.898					Std error	199.846
New Zealand
Brewster	Glacier	New Zealand	Mass balance (kg m-2 yr-1)					1141	282	297	-1653	-828			-152.2		Mean	-152.2			1141		Mean	1141			-475.5		Mean	-475.5			-152.2		Mean	-152.2
Ivory	Glacier	New Zealand	Mass balance (kg m-2 yr-1)														Area	1165	5				Area	1165	1				Area	1165	4				Area	1165	5
																	Area fraction	0.00158683	1092.22				Area fraction	0.00158683					Area fraction	0.00158545	945.397				Area fraction	0.00158545	1092.22
																		Std error	488.456					Std error						Std error	472.698					Std error	488.456
Antarctica
Bahia Del Diablo	Glacier	Antarctica	Mass balance (kg m-2 yr-1)	-60	-510	-150	-110	-230	-580	-80	-530	-255	370		-213.5	10	1	-213.5	6823.94		-212	5	1	-212	6978.67		-215	5	1	-215	6724		-276.429	7	1	-276.429	6248.53
Hurd	Glacier	Antarctica	Mass balance (kg m-2 yr-1)		-140	-520	10	-120	-860	-540	190	-390	290		-231.111	9	0.9	-208	9039.33		-192.5	4	0.8	-154	3280.74		-262	5	1	-262	16641		-318.571	7	1	-318.571	14687.1
Johnsons	Glacier	Antarctica	Mass balance (kg m-2 yr-1)		20	-160	80	220	-330	290	90	-170	510		61.1111	9	0.9	55	33179		40	4	0.8	32	22703.4		78	5	1	78	44521		2.85714	7	1	2.85714	40095.3
																Nf	2.8	-366.5	49042.2			Nf	2.6	-334	32962.8			Nf	3	-399	67886			Nf	3	-592.143	61031
																	Mean	-130.893	165.063				Mean	-128.462	143.533				Mean	-133	184.236				Mean	-197.381	174.687
																		Std error	98.6438					Std error	89.0155					Std error	106.369					Std error	100.855
																	Area	132867					Area	132867					Area	132867					Area	132867
																	Area fraction	0.180976					Area fraction	0.180976					Area fraction	0.180819					Area fraction	0.180819
Regions	Mean mass balance, 2001-2010
Alaska (n=3)	-685.733														Cumulative area (minus North Asia) (km2)						Cumulative area (minus North Asia) (km2)						Cumulative area (minus North Asia) (km2)						Cumulative area (minus North Asia) (km2)
W. Canada/U.S. (n=19)	-989.291														734168						734168						734168						734168
Arctic Canada (n=2)	-275.375
Greenland (n=1)	-986														Mean area weighted mass balance						Mean area weighted mass balance						Mean area weighted mass balance						Mean area weighted mass balance
Iceland (n=10)	-1062.66														-480.632						-501.616						-464.154						-510.669
Svalbard (n=6)	-470.912														Mean area weighted error	(95% confidence interval)					Mean area weighted error	(95% confidence interval)					Mean area weighted error	(95% confidence interval)					Mean area weighted error	(95% confidence interval)
Scandinavia (n=18)	-826.488														273.26						287.178						307.434						283.319
Central Europe (n=19)	-905.158
Caucasus (n=2)	-271.15
Central Asia (n=7)	-538.096
Northern Andes (n=4)	-834.667
Southern Andes (n=1)	-206.7
New Zealand (n=1)	-152.2
Antarctic (n=3)	-130.893

## Sheet: G. Regional alpha (RGI) 
Name	Glacier/ice cap	Country	Data to right	2001	2002	2003	2004	2005	2006	2007	2008	2009	2010		Mean alpha 2001-10	Count Mn	Area and	Volume and	f	Weighted alpha	Variance calc.	Average gamma	Error gamma	pA	pV	Error alpha	Weighted pA error	Error pV: alpha	Error pV: gamma	Error pV	Weighted pV error		Mean alpha 2001-05	Count Mn	f	Weighted alpha	Variance calc.		Mean alpha 2006-10	Count Mn	f	Weighted alpha	Variance calc.
n=144																	area fraction	volume fraction
Alaska
Gulkana	Glacier	US (Alaska)	Alpha	0.882353	0.789474	1.02167	0.743034	0.866873	0.990712	0.820433	1.02167	0.866873	0.665635		0.866873	10			1	0.866873	0.000408693												0.860681	5	1	0.860681	0.000421739		0.873065	5	1	0.873065	0.00413729
Lemon Creek	Glacier	US (Alaska)	Alpha	1.15373	1.0039	0.0749176	0.884028	0.913995	1.01888	1.07881	1.19868	0.958945	0.749176		0.903506	10			1	0.903506	0.000269516												0.806113	5	1	0.806113	0.00115815		1.0009	5	1	1.0009	0.0040338
McCall	Glacier	US (Alaska)	Alpha
Wolverine	Glacier	US (Alaska)	Alpha	1.10489	0.938399	0.96867	0.560012	0.696231	0.938399	0.938399	1.18057	0.696231			0.891311	9			0.9	0.80218	1.60378e-05												0.85364	5	1	0.85364	0.000182122		0.938399	4	0.8	0.750719	8.19147e-07
																Nf			2.9	2.57256	0.000694246													Nf	3	2.52043	0.00176201			Nf	2.8	2.62468	0.00817191
																	89051	27868	Mean	0.887089	0.0191152														Mean	0.840145	0.0296817				Mean	0.937387	0.0673792
																	0.121295	0.132895		Std error	0.0112249	1.36	0.02	-0.112911	-0.150359	0.2764	0.00112399	0.360035	0.0169928	0.360436	0.00229443					Std error	0.0171367					Std error	0.0402667
																																			Volume	27868					Volume	27868
																					(alpha error 0.276)	(95% confidence interval)													Volume fraction	0.11569					Volume fraction	0.11569
Western Canada and US
Alexander	Glacier	Canada	Alpha
Andrei	Glacier	Canada	Alpha
Bench	Glacier	Canada	Alpha
Blue	Glacier	US	Alpha
Columbia (2057)	Glacier	US	Alpha	0.310511	1.3352	0.357087	0.186306	0.0931532	0.621022	0.931532	1.3352	0.574445	0.978109		0.672256	10			1	0.672256	0.0100529												0.456451	5	1	0.456451	0.000349014		0.888061	5	1	0.888061	0.0341743
Daniels	Glacier	US	Alpha	0.221164	1.08881	0.357264	0.374277	0.306227	0.578428	1.05478	1.29296	0.476353	1.02076		0.677101	10			1	0.677101	0.011048												0.469547	5	1	0.469547	0.00100987		0.884655	5	1	0.884655	0.0329265
Easton	Glacier	US	Alpha	0.680798	1.14498	0.711744	0.773635	0.587962	0.773635	1.08309	1.14498	0.587962	1.1914		0.868018	10			1	0.868018	0.0876316												0.779824	5	1	0.779824	0.117001		0.956212	5	1	0.956212	0.0640163
Emmons	Glacier	US	Alpha			0.210728			0.766284	0.977011	0.689655				0.66092	4			0.4	0.264368	0.00316327												0.210728	1	0.2	0.0421456	0.0103095		0.810983	3	0.6	0.48659	0.00697062
Foss	Glacier	US	Alpha	0.151492	1.06045	0.37873	0.151492	0	0.545372	0.818058	1.09074	0.181791	0.939252		0.531738	10			1	0.531738	0.00162038												0.348432	5	1	0.348432	0.00798108		0.715043	5	1	0.715043	0.00014031
Helm	Glacier	Canada	Alpha	0.637472			0	0	0	0.332594	0.0554324	0.332594			0.194013	7			0.7	0.135809	0.100007												0.212491	3	0.6	0.127494	0.0304502		0.180155	4	0.8	0.144124	0.218859
Ice Worm	Glacier	US	Alpha	0	1.1557	0	0	0	0.321027	0.770465	0.963082	0.561798	0.963082		0.473515	10			1	0.473515	0.00969758												0.23114	5	1	0.23114	0.0426957		0.715891	5	1	0.715891	0.00016111
Lower Curtis	Glacier	US	Alpha	0.39847	1.08384	0.557858	0.478164	0.318776	0.637552	0.956328	1.05196	0.318776	0.92445		0.672617	10			1	0.672617	0.0101255												0.567421	5	1	0.567421	0.0168097		0.777813	5	1	0.777813	0.00556744
Lynch	Glacier	US	Alpha	0.379881	0.987692	0.57742	0.303905	0.227929	0.638201	1.06367	1.15484	0.379881	0.850935		0.656435	10			1	0.656435	0.00713073												0.495365	5	1	0.495365	0.00331736		0.817505	5	1	0.817505	0.0130661
Noisy Creek	Glacier	US	Alpha	0	1.55986	0	0	0	0	0.0187935	0.375869	0	0.563804		0.251832	10			1	0.251832	0.102502												0.311971	5	1	0.311971	0.015825		0.191693	5	1	0.191693	0.261637
North Klawatti	Glacier	US	Alpha	0	1.20724	0	0.318578	0.0503018	0.318578	0.838364	1.17371	0	1.17371		0.508048	10			1	0.508048	0.00408874												0.315225	5	1	0.315225	0.0150171		0.700872	5	1	0.700872	5.41043e-06
Peyto	Glacier	Canada	Alpha	0.564726	0.803649	0	0.629887	0.456125	0.217202	0.86881	0.89053	0.390964			0.535766	9			0.9	0.482189	0.00118106												0.490877	5	1	0.490877	0.00282052		0.591877	4	0.8	0.473501	0.00991395
Place	Glacier	Canada	Alpha	0.448888			0	0.020404	0	0.530504	0.81616	0.10202			0.273997	7			0.7	0.191798	0.0621607												0.156431	3	0.6	0.0938584	0.0474907		0.362171	4	0.8	0.289737	0.0930395
Rainbow	Glacier	US	Alpha	0.634058	1.02657	0.754831	0.679348	0.573671	0.694444	1.14734	1.20773	0.543478	1.20773		0.84692	10			1	0.84692	0.0755858												0.733696	5	1	0.733696	0.0875726		0.960145	5	1	0.960145	0.0660218
Ram River	Glacier	Canada	Alpha
Sandalee	Glacier	US	Alpha	0	0.252171	0	0	0	0.112076	0.168114	1.12076	0	1.84926		0.350238	10			1	0.350238	0.0491746												0.0504343	5	1	0.0504343	0.150028		0.650042	5	1	0.650042	0.00282555
Sentinel	Glacier	Canada	Alpha
Sholes	Glacier	US	Alpha	0.411914	1.02978	0.554499	0.396071	0.237643	0.712928	1.14068	1.18821	0.237643	1.3308		0.724018	10			1	0.724018	0.023112												0.525982	5	1	0.525982	0.00778159		0.922053	5	1	0.922053	0.0478976
Silver	Glacier	US	Alpha	1.41112	1.13732	0.779275	0.294861	0.168492	0.126369	0.168492	0.84246	0.273799	1.85341		0.70556	10			1	0.70556	0.0178406												0.758214	5	1	0.758214	0.102685		0.652906	5	1	0.652906	0.00252923
South Cascade	Glacier	US	Alpha	0	1.59121	0.132601	0.0947149	0.0947149	0.18943	1.13658	0.606175	0			0.427269	9			0.9	0.384543	0.01885												0.382648	5	1	0.382648	0.00303829		0.483046	4	0.8	0.386437	0.0387735
Watson	Glacier	US	Alpha
Woolsey	Glacier	Canada	Alpha
Yawning	Glacier	US	Alpha	0.307361	1.18334	0.153681	0.307361	0.230521	0.829876	1.07576	1.07576	0.461042	1.07576		0.670048	10			1	0.670048	0.009615												0.436453	5	1	0.436453	1.73159e-06		0.903642	5	1	0.903642	0.0401779
Yuri	Glacier	Canada	Alpha
Zavisha	Glacier	Canada	Alpha
																Nf			17.6	10.0671	0.604588													Nf	17.4	7.61718	0.662184			Nf	17.8	12.5169	0.938703
																	14505	1275	Mean	0.571992	0.190843														Mean	0.437769	0.200941				Mean	0.703198	0.236379
																	0.0197571	0.00608014		Std error	0.0454904	1.36	0.02	-0.428008	-0.532211	0.063	1.54926e-06	0.0700712	0.00935578	0.0706931	1.84749e-07					Std error	0.0481718					Std error	0.0560273
																																			Volume	1275					Volume	1275
																					(alpha error 0.063)	(95% confidence interval)													Volume fraction	0.00529296					Volume fraction	0.00529296
Arctic Canada
Baby	Glacier	Canada	Alpha
Devon NW	Ice cap	Canada	Alpha	0.291215	0.970717	0.647144	1.05161	0.550073	0.453001	0.388287	0.258858	0.2438	0.3576		0.52123	10			1	0.52123	0.00666517												0.702152	5	1	0.702152	0.00396608		0.340309	5	1	0.340309	0.0100609
White	Glacier	Canada	Alpha	0.711	1.11529	0.808588	1.04559	0.460059	0.850411	0.348529	0.292765	0.404294	0.808588		0.684511	10			1	0.684511	0.00666517												0.828105	5	1	0.828105	0.00396608		0.540917	5	1	0.540917	0.0100609
Hidden	Glacier	Canada	Alpha
Minaret	Glacier	Canada	Alpha
Superguksoak	Glacier	Canada	Alpha
																Nf			2	1.20574	0.0133303													Nf	2	1.53026	0.00793216			Nf	2	0.881226	0.0201218
																	145887	64901	Mean	0.602871	0.115457														Mean	0.765129	0.0890627				Mean	0.440613	0.141851
																	0.198711	0.309496		Std error	0.0816405	1.31	0.05	-0.397129	-0.48466	0.3483	0.00479015	0.390027	0.025767	0.390877	0.0146349					Std error	0.0629768					Std error	0.100304
																																			Volume	64901					Volume	64901
																					(alpha error 0.348)	(95% confidence interval)													Volume fraction	0.269426					Volume fraction	0.269426
Greenland
Mittivakkat	Glacier	Greenland	Alpha	0	0.707262	1.29377	0.0862515	0	0.310505	0	0.707262	0.310505	0		0.341556		87810	17130	Mean	0.341556													0.417457		Mean	0.417457			0.265655		Mean	0.265655
																	0.119605	0.0816885				1.31	0.05	-0.658444	-0.755187	0.5061	0.00366412	0.475205	0.0122407	0.475362	0.0015079				Volume	17130					Volume	17130
																					(alpha error 0.5061)	(95% confidence interval)													Volume fraction	0.0711125					Volume fraction	0.0711125
Iceland
Breidamjok. E.B.	Ice cap	Iceland	Alpha	0.685484	0.712366	0.806452	0.672043	0.510753							0.677419	5			0.5	0.33871	0.000912052												0.677419	5	1	0.677419	0.00180453
Bruarjokull	Ice cap	Iceland	Alpha	1.06831	0.955002	0.841696	0.793137	0.388475	0.809323	0.874069	0.82551	0.955002	0.226611		0.773713	10			1	0.773713	0.00287128												0.809323	5	1	0.809323	0.0079967		0.738103	5	1	0.738103	0.000313148
Dyngjujokull	Ice cap outlet	Iceland	Alpha					0.608153					0.361604		0.484878	2			0.2	0.0969757	0.0110686												0.608153	1	0.2	0.121631	0.00249746		0.361604	1	0.2	0.0723208	0.0257479
Eyjabakkajokull	Ice cap	Iceland	Alpha	1.07411	0.841389	0.698174	0.66237	0.447547	0.644468	0.841389	0.698174	0.75188	0.322234		0.698174	10			1	0.698174	0.000482016												0.744719	5	1	0.744719	0.000616022		0.651629	5	1	0.651629	0.0047304
Hofsjokull E (Thjorsarjokull)	Ice cap outlet	Iceland	Alpha	0.564016	0.808423	0.658018	0.695619	1.01523	0.864824	0.827223	0.864824	0.940026			0.804245	9			0.9	0.72382	0.00636793												0.748261	5	1	0.748261	0.000804392		0.874224	4	0.8	0.69938	0.0189279
Hofsjokull N (Satujokull)	Ice cap outlet	Iceland	Alpha	0.797925	0.758029	0.658288	0.598444	0.837822	0.817874	1.01735	0.758029	0.977459			0.802358	9			0.9	0.722122	0.00608551												0.730102	5	1	0.730102	0.000104093		0.892679	4	0.8	0.714143	0.0237421
Hofsjokull SW (Blagnipujokull)	Ice cap	Iceland	Alpha	0.409165	1.04337	0.961538	0.490998	1.04337	1.02291	0.920622	0.94108	1.10475			0.881979	9			0.9	0.793781	0.0235758												0.789689	5	1	0.789689	0.00487063		0.99734	4	0.8	0.797872	0.0613537
Koeldukvislarj kull	Ice cap	Iceland	Alpha	0.763731	0.909977	0.844979	0.747481	0.747481	0.877478	0.958726	0.828729	0.926227	0.129997		0.773481	10			1	0.773481	0.00284641												0.80273	5	1	0.80273	0.00686094		0.744231	5	1	0.744231	0.000567603
Langjokull S. Dome	Ice cap	Iceland	Alpha	0.496894	0.496894	0.408163	0.585626	0.727595	0.727595	0.479148	0.496894	0.887311	0		0.530612	10			1	0.530612	0.0359166												0.543035	5	1	0.543035	0.0312811		0.51819	5	1	0.51819	0.0408917
Tungnaarjokull	Ice cap	Iceland	Alpha	0.714634	0.568459	0.730875	0.649667	0.617184	0.665909	0.649667	0.600942	0.7796	0		0.597694	10			1	0.597694	0.0149904												0.656164	5	1	0.656164	0.00406221		0.539224	5	1	0.539224	0.0328274
																Nf			8.4	6.04908	0.105116													Nf	9.2	6.62307	0.060898			Nf	7.6	5.47509	0.209102
																	11058	2655	Mean	0.720129	0.119184														Mean	0.719899	0.0861777				Mean	0.720407	0.177995
																	0.0150619	0.012661		Std error	0.0411225	1.31	0.05	-0.279871	-0.34956	0.089	1.79698e-06	0.105307	0.032522	0.110215	1.94723e-06					Std error	0.0284119					Std error	0.0645655
																																			Volume	2655					Volume	2655
																					(alpha error 0.089)	(95% confidence interval)													Volume fraction	0.0110218					Volume fraction	0.0110218
Svalbard
Austre Broggerbreen	Glacier	Norway (Svalbard)	Alpha	0.1413			0	0	0.100929	0.201857	0.504643	0.322971	0.262414		0.191764	8			0.8	0.153411	0.0697187												0.0471	3	0.6	0.02826	0.0560013		0.278563	5	1	0.278563	0.107833
Hansbreen	Ice cap	Norway (Svalbard)	Alpha	0	0.467814	0.467814	0.467814	1.21632	1.14147	1.01048	1.12275	0.467814	0.72979		0.709207	10			1	0.709207	0.0493876												0.523952	5	1	0.523952	0.0293586		0.894461	5	1	0.894461	0.0826673
Irenebreen	Glacier	Norway (Svalbard)	Alpha		0.696613	0.600528	0.648571	0.240211	0.576507	0.480423	0.744655	0.144127			0.516454	8			0.8	0.413164	0.00069531												0.546481	4	0.8	0.437185	0.0300692		0.486428	4	0.8	0.389142	0.0116189
Kongsvegen	Ice cap	Norway (Svalbard)	Alpha	0.269207	0.641955	0.517706	0.103541	0.393456	0.952578	0.807621	1.38745	0.828329	1.07683		0.697867	10			1	0.697867	0.0444762												0.385173	5	1	0.385173	0.00106043		1.01056	5	1	1.01056	0.162909
Midtre Lovenbreen	Glacier	Norway (Svalbard)	Alpha	0.331553			0	0.092098	0.257874	0.47891	0.699945	0.534168	0.534168		0.36609	8			0.8	0.292872	0.0116903												0.141217	3	0.6	0.0847302	0.0268119		0.501013	5	1	0.501013	0.0112209
Waldemarbreen	Glacier	Norway (Svalbard)	Alpha	0.0213904	0.427807	0.299465	0.449198	0.320856	0.342246	0.278075	0.663102	0.342246			0.349376	9			0.9	0.314439	0.0170397												0.303743	5	1	0.303743	0.00238782		0.406417	4	0.8	0.325134	0.0321681
																Nf			5.3	2.58096	0.193008													Nf	5	1.76304	0.145689			Nf	5.6	3.39887	0.408417
																	33837	9089	Mean	0.486973	0.211862														Mean	0.352609	0.190846				Mean	0.606942	0.29797
																	0.0460889	0.0433431		Std error	0.092027	1.31	0.05	-0.513027	-0.610388	0.1542	5.05082e-05	0.161615	0.0194806	0.162785	4.97816e-05					Std error	0.085349					Std error	0.125915
																																			Volume	9089					Volume	9089
																					(alpha error 0.1542)	(95% confidence interval)													Volume fraction	0.0377315					Volume fraction	0.0377315
Scandinavia
Aalfotbreen	Ice cap outlet	Norway	Alpha	0	0	0	0.942893	1.38765	0	1.72567	1.40544	0.853941	0		0.63156	10			1	0.63156	0.00992739												0.466109	5	1	0.466109	0.0001071		0.797011	5	1	0.797011	0.0450828
Austdalsbreen	Ice cap	Norway	Alpha	0	0	0	0.696864	1.18164	0	1.13619	1.07559	0.848356	0		0.493865	10			1	0.493865	0.00144852												0.375701	5	1	0.375701	0.0101521		0.612028	5	1	0.612028	0.000747717
Bondhusbreen	Glacier	Norway	Alpha
Breidalblikkbrea	Glacier	Norway	Alpha			0	0.311584	0.879765	0	1.28299	0.806452	0.549853	0		0.478831	8			0.8	0.383065	0.00225512												0.397116	3	0.6	0.23827	0.00377708		0.527859	5	1	0.527859	0.00322906
Engabreen	Ice cap	Norway	Alpha	0	0.902859	0.919579	1.38773	1.33757	0.43471	1.40445	1.28741	1.05334	0.785822		0.951346	10			1	0.951346	0.175915												0.909547	5	1	0.909547	0.187566		0.993145	5	1	0.993145	0.16684
Graafjellsbrea	Glacier	Norway	Alpha			0	0.421941	1.17792	0	1.40647	0.984529	0.545007	0		0.566983	8			0.8	0.453586	0.000983318												0.533286	3	0.6	0.319972	0.00193767		0.587201	5	1	0.587201	6.33562e-06
Graasubreen	Glacier	Norway	Alpha	1.30435	0	0	0.202899	0.376812	0	0.0289855		0.202899	0.115942		0.247987	9			0.9	0.223188	0.0725581												0.376812	5	1	0.376812	0.00992944		0.0869565	4	0.8	0.0695652	0.198186
Hansebreen	Glacier	Norway	Alpha	0	0.467814	0.467814	0.467814	1.21632	1.14147	1.01048	1.12275	0.467814	0.72979		0.709207	10			1	0.709207	0.0314291												0.523952	5	1	0.523952	0.00225567		0.894461	5	1	0.894461	0.0959618
Hardangerjokulen	Ice cap	Norway	Alpha	0.566114	0.633509	0	1.01092	1.13223	0	1.14571	1.10527	1.06483	0		0.665858	10			1	0.665858	0.0179383												0.668554	5	1	0.668554	0.0369007		0.663162	5	1	0.663162	0.00615881
Hellstugubreen	Glacier	Norway	Alpha	0.815633	0.118946	0	0.390824	0.662702	0	0.424809	0.968564	0.713679	0		0.409516	10			1	0.409516	0.0149838												0.397621	5	1	0.397621	0.00621529		0.42141	5	1	0.42141	0.0266583
Hoegtuvbreen	Glacier	Norway	Alpha
Jostefonn	Glacier	Norway	Alpha
Karsojietna	Glacier	Sweden	Alpha
Langfjordjokelen	Glacier	Norway	Alpha	0	0	0	0	0.44843	0	0.672646	0.848815	0	0.192184		0.216208	10			1	0.216208	0.0996768												0.0896861	5	1	0.0896861	0.149593		0.342729	5	1	0.342729	0.0585422
Maarmaglaciaren	Glacier	Sweden	Alpha	0.733272	0.458295	0.183318	0.427742	0.458295	0.336083	0.397189	1.31378	0.458295	0.549954		0.531622	10			1	0.531622	9.09409e-08												0.452185	5	1	0.452185	0.000589208		0.61106	5	1	0.61106	0.0006957
Nigardsbreen	Ice cap	Norway	Alpha	1.0528	0.411252	0	1.15151	1.43116	0.0658003	1.49696	1.49696	1.31601	0.230301		0.865274	10			1	0.865274	0.111122												0.809344	5	1	0.809344	0.110813		0.921204	5	1	0.921204	0.113246
Rabots Glaciar	Glacier	Sweden	Alpha	0.24326	0.283803	0.0202716			0.385161		0.871681	0.729779	0.263531		0.399641	7			0.7	0.279749	0.0122492												0.182445	3	0.6	0.109467	0.0518663		0.562538	4	0.8	0.45003	0.000392358
Riukojietna	Ice cap	Sweden	Alpha		0	0			0	0	0	0.0365163	0		0.00521662	7			0.7	0.00365163	0.194194												0	2	0.4	0	0.0908049		0.00730327	5	1	0.00730327	0.333369
Spoerteggbreen	Glacier	Norway	Alpha
Storbreen	Glacier	Norway	Alpha	0.426743	0	0.0355619	0.391181	0.76458	0	0.533428	0.906828	0.94239	0.0711238		0.407183	10			1	0.407183	0.0155602												0.323613	5	1	0.323613	0.0233616		0.490754	5	1	0.490754	0.00882287
Storglaciaren	Glacier	Sweden	Alpha	0.663864	0.818765	0.641735	0.885152	0.951538	0.376189	1.10644	1.17283	0.818765	0.619606		0.805488	10			1	0.805488	0.0748373												0.792211	5	1	0.792211	0.0996997		0.818765	5	1	0.818765	0.054794
Storglombreen	Glacier	Norway	Alpha	0	0	0	1.22219	1.23786							0.492009	5			0.5	0.246004	0.00079661												0.492009	5	1	0.492009	0.000241822
Storsteinsfjellbreen	Glacier	Norway	Alpha
Svartisheibreen	Glacier	Norway	Alpha
Tarfalaglaciaren	Glacier	Sweden	Alpha				0.425532	0.012951	0	1.3506	0.555042		0		0.390688	6			0.6	0.234413	0.0119686												0.219241	2	0.4	0.0876966	0.0264642		0.476411	4	0.8	0.381129	0.00937849
Trollbergdalsbreen	Glacier	Norway	Alpha
																Nf			16	8.51078	0.847844													Nf	15.6	7.43275	0.812274			Nf	16.4	9.58882	1.12211
																	2852	201	Mean	0.531924	0.237745														Mean	0.476458	0.235871				Mean	0.584684	0.269934
																	0.00388467	0.000958517		Std error	0.0594364	1.31	0.05	-0.468076	-0.562616	0.063	5.98948e-08	0.0678618	0.0218692	0.0712985	4.67047e-09					Std error	0.059719					Std error	0.0666555
																																			Volume	201					Volume	201
																					(alpha error 0.063)	(95% confidence interval)													Volume fraction	0.00083442					Volume fraction	0.00083442
Russian Arctic
No. 104	Glacier	Russia	Alpha														51784	17778	Mean	0.486973	(Russian Arctic = Svalbard)														Mean	0.352609	(Russian Arctic = Svalbard)				Mean	0.606942	(Russian Arctic = Svalbard)
																	0.0705343	0.0847787				1.31	0.05	-0.513027	-0.610388	0.1542	0.000118296	0.161615	0.0194806	0.162785	0.000190459				Volume	17778					Volume	17778
																					(alpha error 0.1542)	(95% confidence interval)													Volume fraction	0.0738025					Volume fraction	0.0738025
North Asia
IGAN	Glacier	Russia	Alpha
Koryto	Glacier	Russia	Alpha
Kozelskiy	Glacier	Russia	Alpha
Mutnovskiy NE	Glacier	Russia	Alpha
Mutnovskiy SW	Glacier	Russia	Alpha
Obrucheva	Glacier	Russia	Alpha
Central Europe
Basodino	Glacier	Switz.	Alpha	1.49049	0.941361	0	0.647186	0.0980584	0	0.0980584	0.0392234	1.37282	0.588351		0.527554	10			1	0.527554	0.0035585												0.635419	5	1	0.635419	0.0116921		0.41969	5	1	0.41969	9.77168e-05
Calderone	Glacier	Italy	Alpha	0.469083	0	0.447761	2.1322	0.447761	2.1322	0	1.59915	1.83369	1.79104		1.08529	10			1	1.08529	0.381166												0.69936	5	1	0.69936	0.0296087		1.47122	5	1	1.47122	1.12659
Careser	Glacier	Italy	Alpha	0.288948	0.024079	0	0	0	0	0	0	0.024079	0.24079		0.0577895	10			1	0.0577895	0.168192												0.0626053	5	1	0.0626053	0.215931		0.0529738	5	1	0.0529738	0.127329
Ciardoney	Glacier	Italy	Alpha	1.38837	0.55535	0	0	0	0	0	0	0.277675	0.185117		0.240652	10			1	0.240652	0.0516424												0.388745	5	1	0.388745	0.0191944		0.0925583	5	1	0.0925583	0.100645
Filleck K.	Glacier	Austria	Alpha
Findelen	Glacier	Switz.	Alpha					0.927588	0.598444	0.927588	0.912627				0.841562	4			0.4	0.336625	0.0558489												0.927588	1	0.2	0.185518	0.032048		0.812886	3	0.6	0.487732	0.0974848
Fontana Bianca	Glacier	Italy	Alpha	1.75926	0.185185	0	0	0	0	0	0	0.166667			0.234568	9			0.9	0.211111	0.049												0.388889	5	1	0.388889	0.0191545		0.0416667	4	0.8	0.0333333	0.108421
Goldbergkees	Glacier	Austria	Alpha	0.435624	0.484027	0	1.25847	1.23427	0.169409	0.580833	0.484027	0.508228	0.653437		0.580833	10			1	0.580833	0.0127535												0.682478	5	1	0.682478	0.0240838		0.479187	5	1	0.479187	0.00481385
Gries	Glacier	Switz.	Alpha	0.880572	0.366905	0	0.0366905	0.0183453	0.0366905	0.0366905	0.0917263	0.0550358	0.201798		0.172445	10			1	0.172445	0.0872942												0.260503	5	1	0.260503	0.0711747		0.0843882	5	1	0.0843882	0.105896
Hintereisferner	Glacier	Austria	Alpha	0.981144	0.781849	0.0459911	0.490572	0.444581	0.168634	0	0.337268	0.383259	0.383259		0.401656	10			1	0.401656	0.00438848												0.548827	5	1	0.548827	0.000463912		0.254484	5	1	0.254484	0.0241246
Jamtalferner	Glacier	Austria	Alpha	1.06494	0.488827	0	0.698324	0.261872	0.139665	0.104749	0.157123	0.174581	0.157123		0.324721	10			1	0.324721	0.0205007												0.502793	5	1	0.502793	0.000600021		0.146648	5	1	0.146648	0.0692516
Kesselwandferner	Glacier	Austria	Alpha	1.27249	1.09697	0	0.892204	0.965336	0.482668	0.321779	0.614305	0.409536	0.380284		0.643557	10			1	0.643557	0.030855												0.8454	5	1	0.8454	0.101195		0.441714	5	1	0.441714	0.0010182
Kleinfleisskees	Glacier	Austria	Alpha	0.816	0.208	0	1.2	1.008	0.16	0.368	0.384	0.416	0.768		0.5328	10			1	0.5328	0.00421185												0.6464	5	1	0.6464	0.0141875		0.4192	5	1	0.4192	8.82669e-05
Limmern	Glacier	Switz.	Alpha
Maladeta	Glacier	Spain	Alpha	1.57931	0.228885	0	0	0	1.16732	1.21309	0.77821	0	1.83108		0.679789	10			1	0.679789	0.0448966												0.361639	5	1	0.361639	0.0274399		0.99794	5	1	0.99794	0.345903
Malavalle	Glacier	Italy	Alpha		0.768927	0.512618	0.926656	0.729495	0.236593	0.177445	0.177445	0.709779	0.828076		0.563004	9			0.9	0.506703	0.00814005												0.734424	4	0.8	0.587539	0.0343242		0.425868	5	1	0.425868	0.000258006
Ochsentaler	Glacier	Switz.	Alpha
Pendente	Glacier	Italy	Alpha	1.46811	0	0	0.216606	0.0481348	0	0	0	0.168472	0.577617		0.247894	10			1	0.247894	0.0484032												0.34657	5	1	0.34657	0.0326591		0.149218	5	1	0.149218	0.0679057
Plattalva	Glacier	Switz.	Alpha
Rhone	Glacier	Switz.	Alpha
Sforzellina	Glacier	Italy	Alpha
Silvretta	Glacier	Switz.	Alpha	1.28228	1.02944	0	0.957197	0.469568	0.0361206	0.379267	0.55987	0.108362	0.794654		0.561676	10			1	0.561676	0.0087937												0.747697	5	1	0.747697	0.04858		0.375655	5	1	0.375655	0.00116624
Sonnblickkees	Glacier	Austria	Alpha	0.673741	0.589523	0.0168435	1.0443	0.741115	0.488462	0.033687	0.387401	0.808489	0.387401		0.517096	10			1	0.517096	0.00242014												0.613104	5	1	0.613104	0.00736433		0.421088	5	1	0.421088	0.000127309
Vermuntgl.	Glacier	Austria	Alpha
Vernagtferner	Glacier	Austria	Alpha	0.704753	0.794722	0	0.509822	0.59979	0.374869	0.2849	0.254911	0.209927	0.344879		0.407857	10			1	0.407857	0.00360528												0.521817	5	1	0.521817	2.99346e-05		0.293897	5	1	0.293897	0.0134346
Wurtenkees	Glacier	Austria	Alpha	0.915141	0.110926	0.0831947	0.776484	0.443705	0.471436	0.110926	0.415973	0.915141	0.554631		0.479756	10			1	0.479756	0.000140534												0.46589	5	1	0.46589	0.00376977		0.493622	5	1	0.493622	0.00702525
																Nf			18.2	8.5158	0.985811													Nf	18	9.4912	0.6935			Nf	18.4	7.54041	2.20158
																	2061	139	Mean	0.467901	0.239405														Mean	0.527289	0.201976				Mean	0.409805	0.355707
																	0.00280726	0.000662855		Std error	0.0561173	1.36	0.02	-0.532099	-0.644033	0.063	3.12785e-08	0.0651831	0.00711934	0.0655707	1.88911e-09					Std error	0.0476061					Std error	0.0829247
																																			Volume	139					Volume	139
																					(alpha error 0.063)	(95% confidence interval)													Volume fraction	0.000577036					Volume fraction	0.000577036
Caucasus
Djankuat	Glacier	Russia	Alpha	0.773799	0.773799	0.773799	0.773799	0.773799	0.755803	0.287925					0.701818	7			0.7	0.491272	0.00846437												0.773799	5	1	0.773799	0.0132085		0.521864	2	0.4	0.208746	0.0104552
Garabashi	Glacier	Russia	Alpha	0.697906	1.11333	1.01363	1.09671	1.09671	0.664673	0.697906	0.830841	0.864074			0.897308	9			0.9	0.807577	0.0065834												1.00366	5	1	1.00366	0.0132085		0.764374	4	0.8	0.611499	0.00522762
Marukh	Glacier	Russia	Alpha
																Nf			1.6	1.29885	0.0150478													Nf	2	1.77745	0.0264171			Nf	1.2	0.820245	0.0156829
																	1100	68	Mean	0.811781	0.158365														Mean	0.888727	0.162533				Mean	0.683537	0.280026
																	0.00149829	0.000324274		Std error	0.125199	1.36	0.02	-0.188219	-0.246927	0.321	2.31315e-07	0.404988	0.0150615	0.405268	1.72707e-08					Std error	0.114928					Std error	0.255627
																																			Volume	68					Volume	68
																					(alpha error 0.321)	(95% confidence interval)													Volume fraction	0.000282291					Volume fraction	0.000282291
Central Asia
Leviy Aktru	Glacier	Russia	Alpha	0.950041	0.917281	0.917281	0.933661	1.01556	0.950041	0.933661		1.09746			0.964373	8			0.8	0.771499	0.0217068												0.946765	5	1	0.946765	0.0193018		0.993721	3	0.6	0.596233	0.0255953
Maliy Aktru	Glacier	Russia	Alpha	0.892074	0.731208	0.77508	0.921322	1.05294	0.87745	0.804329		1.19918			0.906698	8			0.8	0.725358	0.00916725												0.874525	5	1	0.874525	0.00444763		0.96032	3	0.6	0.576192	0.0179862
No. 125 (Vodopadniy)	Glacier	Russia	Alpha	1.00818	0.964348	0.935126	0.964348	1.03741	0.97896	0.97896		1.24196			1.01366	8			0.8	0.810929	0.0366405												0.981882	5	1	0.981882	0.0302926		1.06663	3	0.6	0.639977	0.0468543
Praviy Aktru	Glacier	Russia	Alpha
Golubin	Glacier	Kirgizstan	Alpha
Sary-Tor	Glacier	Kirgizstan	Alpha
Urumqihe S. No. 1	Glacier	China	Alpha	0.709921	0.656003	0.871675	0.73688	0.916607	0.557153	0.575126	0.305536	1.15025	0		0.647915	10			1	0.647915	0.0230237												0.778217	5	1	0.778217	0.000877172		0.517613	5	1	0.517613	0.0726668
Xiaodongkemadi	Glacier	China	Alpha
No. 356	Glacier	Russia	Alpha
Shumskiy	Glacier	Russia	Alpha
Suyok Zapadniy	Glacier	Russia	Alpha
Ts. Tuyuksuyskiy	Glacier	Russia	Alpha	0.741319	0.682794	1.01444	0.819352	0.936403	0.429185	0.663285	0.429185	1.28755	1.07296		0.807647	10			1	0.807647	6.39429e-05												0.838861	5	1	0.838861	0.000962645		0.776434	5	1	0.776434	0.000115501
Abramov	Glacier	Kirgizstan	Alpha
Chhota Shigri	Glacier	India	Alpha			0.446236	0.446236	1.06521	0.417446						0.593781	4			0.4	0.237513	0.0169529												0.65256	3	0.6	0.391536	0.0144661		0.417446	1	0.2	0.0834893	0.0273407
Hamtah	Glacier	India	Alpha	0.387409	0.532688	0.532688	0.338983		0.581114						0.474576	5			0.5	0.237288	0.0528367												0.447942	4	0.8	0.358354	0.103618		0.581114	1	0.2	0.116223	0.00849274
Shaune Garang	Glacier	India	Alpha
																Nf			5.3	4.23815	0.160392													Nf	6.4	5.17014	0.173966			Nf	4.2	3.30616	0.199052
																	123604	12807	Mean	0.799651	0.193133														Mean	0.807834	0.179488				Mean	0.787181	0.249406
																	0.168359	0.0610733		Std error	0.0838917	1.31	0.05	-0.200349	-0.253896	0.1582	0.000709393	0.193365	0.0373052	0.19693	0.000144653					Std error	0.0709488					Std error	0.121698
																																			Volume	12807					Volume	12807
																					(alpha error 0.1582)	(95% confidence interval)													Volume fraction	0.0531662					Volume fraction	0.0531662
Northern Andes
Antizana15Alpha	Glacier	Equador	Alpha	0.843289	0.702741	0.590302	0.78707	0.773015	0.75896	0.744905	1.19466	0.75896	0.75896		0.791286	10			1	0.791286	0.00655683												0.739283	5	1	0.739283	0.00632027		0.843289	5	1	0.843289	0.0100267
Charquini Sur	Glacier	Bolivia	Alpha			0.449827	0.0692042	0	0.67474	0.657439	1.609	0.50173	0.17301		0.516869	8			0.8	0.413495	0.0299362												0.17301	3	0.6	0.103806	0.142169		0.723183	5	1	0.723183	0.00039888
La Conejera	Glacier	Colombia	Alpha						0.025208	0.201664	1.84018	0.100832	0.0504159		0.44366	5			0.5	0.22183	0.0355515																		0.44366	5	1	0.44366	0.0896974
Zongo	Glacier	Bolivia	Alpha	1.09043	0.930503	1.10497	0.697877	0.537947	1.03228	0.930503	1.11951	0.799651	0.930503		0.917418	10			1	0.917418	0.0428929												0.872347	5	1	0.872347	0.0451832		0.962489	5	1	0.962489	0.0481073
																Nf			3.3	2.34403	0.114938													Nf	2.6	1.71544	0.193672			Nf	4	2.97262	0.14823
																	4040	231	Mean	0.710312	0.223546														Mean	0.659783	0.347915				Mean	0.743155	0.222284
																	0.00550283	0.00110158		Std error	0.123058	1.36	0.02	-0.289688	-0.371984	0.2088	1.32018e-06	0.251068	0.0125603	0.251382	7.6683e-08					Std error	0.215768					Std error	0.111142
																																			Volume	231					Volume	231
																					(alpha error 0.2088)	(95% confidence interval)													Volume fraction	0.00095896					Volume fraction	0.00095896
Southern Andes
Martial Este	Glacier	Argentina	Alpha	1.78253	0	0.713012	0	0.231729	0.677362	1.10517	0.998217	0.909091			0.713012		32547	6842	Mean	0.713012													0.545455		Mean	0.545455			0.92246		Mean	0.92246
																	0.0443318	0.0326277				1.31	0.05	-0.286988	-0.357967	0.5061	0.000503389	0.596991	0.0321016	0.597853	0.000380507				Volume	6842
																																			Volume fraction	0.0284035					Volume	6842
																					(alpha error 0.5061)	(95% confidence interval)																			Volume fraction	0.0284035
New Zealand
Brewster	Glacier	New Zealand	Alpha					1.53981	1.25984	1.17235	0.174978	0.454943			0.920385		1165	79	Mean	0.920385		1.36	0.02	-0.079615	-0.106698	0.4712	5.59077e-07	0.621975	0.017866	0.622232	5.49498e-08								0.765529		Mean	0.765529
Ivory	Glacier	New Zealand	Alpha														0.00158683	0.00037673															1.53981		Mean	1.53981					Volume	79
																																			Volume	79					Volume fraction	0.000327956
																					(alpha error 0.4712)	(95% confidence interval)													Volume fraction	0.000327956
Antarctica
Bahia Del Diablo	Glacier	Antarctica	Alpha	1.04102	0.62461	0.832813	0.916094	0.791172	0.853633	1.0202	0.687071	0.895274			0.85132	9			0.9	0.766188	0.00148588												0.841141	5	1	0.841141	0.000546277		0.864043	4	0.8	0.691235	0.00228017
Hurd	Glacier	Antarctica	Alpha		0.677074	0.206884	1.01561	0.771112	0.376152	0.413767	1.29772	0.639458	1.44819		0.760663	9			0.9	0.684597	0.0155132												0.66767	4	0.8	0.534136	0.030998		0.835057	5	1	0.835057	0.00678536
Johnsons	Glacier	Antarctica	Alpha		1.01664	0.720887	1.21996	1.40481	0.794824	0.77634	1.23845	0.683919	1.71904		1.06387	9			0.9	0.957486	0.0266013												1.09057	4	0.8	0.872458	0.0408823		1.04251	5	1	1.04251	0.0156458
																Nf			2.7	2.40827	0.0436003													Nf	2.6	2.24774	0.0724266			Nf	2.8	2.56881	0.0247113
																	132867	48636	Mean	0.891952	0.160148														Mean	0.864514	0.21276				Mean	0.917431	0.117169
																	0.180976	0.231932		Std error	0.0974627	1.31	0.05	-0.108048	-0.139111	0.2764	0.00250219	0.349474	0.0430445	0.352115	0.00666949					Std error	0.131948					Std error	0.0700217
Regions	Mean alpha, 2001-2010																																		Volume	48636					Volume	48636
Alaska (n=3)	0.887089																				(alpha error 0.2764)	(95% confidence interval)													Volume fraction	0.201905					Volume fraction	0.201905
W. Canada/U.S. (n=19)	0.571992
Arctic Canada (n=2)	0.602871
Greenland (n=1)	0.341556														Cumulative volume (km3)		Cumulative area (km2)																Cumulative volume (km3)						Cumulative volume (km3)
Iceland (n=10)	0.720129														209699		734168																209699						209699
Svalbard (n=6)	0.486973
Scandinavia (n=18)	0.531924														Mean area weighted alpha																		Mean volume weighted alpha						Mean volume weighted alpha
Central Europe (n=19)	0.467901														0.684813																		0.709554						0.666918
Caucasus (n=2)	0.811781
Central Asia (n=7)	0.799651														pA weighted	Total pA error
Northern Andes (n=4)	0.710312														-0.315187	0.11605
Southern Andes (n=1)	0.713012
New Zealand (n=1)	0.920385														pV weighted	Total pV error
Antarctic (n=3)	0.891952														-0.378484	0.160855

## Sheet: H. G vs. IC partition
Region	GIC	Ice caps	Ice cap fraction
Alaska
Brooks and Arctic Ocean	132	0
Alaska Range	446	1
Kenai Mountains	1	0
Chugach	403	2
St. Elias	1425	0
Coast	2978	0
Total	5385	3	0.000557103
Western Canada and US
Rookies + Coast	4908	0
Olympic	256	0
North Cascades	743	0
Sierra Nevada	429	0
Total	6336	0	0
Arctic Canada
Axel Heiberg	1084	70
Devon ice cap	645	5
Ellesmere Island	117	1
Total	1846	76	0.0411701
Greenland
Greenland	5017	837
Total	5017	837	0.166833
Iceland
Iceland	64	16
Total	64	16	0.25
Svalbard + Russian Arctic
Svalbard	2195	16
Severnaya Zemlya	385	68
Novaya Zemlya	685	37
Franz Joseph Land	995	349
Total	4260	470	0.110329
Scandinavia
Scandinavia	2408	43
Total	2408	43	0.0178571
North Asia
Polar Ural	70	0
Altai	1854	31
Kamchatka	398	1
Suntar-Khayata Range	430	0
Dzhungaria	1482	53
North and East Asia	1187	0
Total	5421	85	0.0156798
Central Europe
Alps	5165	4
Total	5165	4	0.000774443
Caucasus
Caucasus	1522	11
Total	1522	11	0.00722733
Central Asia
Himalaya	27761	466
Kun-Lun	11633	68
Tibet	2140	10
Pamir	13260	93
Quilanskan	3165	19
Gongga	1664	5
Tien Shan	15004	242
Total	74627	903	0.0121002
Northern Andes
South America I	4479	26
Total	4479	26	0.00580487
Southern Andes
South America II	1233	11
S. And N. Patagonia	1421	15
Total	2654	26	0.00979653
New Zealand
New Zealand	3122	0
Total	3122	0	0
Antarctica
Sub-Antarctic islands	221	15
Antarctica	340	128
Total	561	143	0.254902

## Sheet: I. Terminus mass balance
Name	Glacier/ice cap	Country	Terminus elevation band (m a.s.l.)	Data to right	1971	1972	1973	1974	1975	1976	1977	1978	1979	1980	1981	1982	1983	1984	1985	1986	1987	1988	1989	1990	1991	1992	1993	1994	1995	1996	1997	1998	1999	2000	2001	2002	2003	2004	2005	2006	2007	2008	2009	2010	Count	Mean net balance, 1971-2010
n=144
Aalfotbreen	Ice cap outlet	Norway	850-900	Terminus mass balance (kg m-2 yr-1)	-620	-1980	740	-650	-450	670	-750	-2000	-1000							-1650	120	-3600	-1440	-1300	-1520	-1400	2600	-80	-1570	-4500	-1200	-3150	-1600	-1500	-4250	-4200	-4650	-2800	-700	-1650					30	-1536
Abramov	Glacier	Kirgizstan	3600-3800	Terminus mass balance (kg m-2 yr-1)	-4350	-2850	-4410	-3880	-4010	-3500	-5320	-4960	-4000	-4980	-3900	-4850	-4170		-5330	-4910	-3740	-4340	-3610	-5350	-5820	-4980	-5080	-6360	-5140	-4690	-6960	-3950													27	-4645.93
Alexander	Glacier	Canada	1100-1200	Terminus mass balance (kg m-2 yr-1)											-2500	-3000	-3000	-2000																											4	-2625
Andrei	Glacier	Canada	600-700	Terminus mass balance (kg m-2 yr-1)											-4500	-5000	-5000	-3500																											4	-4500
Antizana15Alpha	Glacier	Equador	4800-4910	Terminus mass balance (kg m-2 yr-1)																									-156	-288	-58	-97	-25	-2045	-4962	-3069	-6633	-5420	-6580	-37	-121				13	-2268.54
Austdalsbreen	Ice cap	Norway	1150-1250	Terminus mass balance (kg m-2 yr-1)																		-4550	-790	-1400	-2200	-3350	-1850	-3150	-2250			-2760				-5750	-4750	-4300	-2500			-3700			14	-3092.86
Austre Broggerbreen	Glacier	Norway (Spitsbergen)	50-100	Terminus mass balance (kg m-2 yr-1)																				-1550	-1020		-2900	-1650	-2740	-1747	-2420		-1800												8	-1978.38
Baby	Glacier	Canada		Terminus mass balance (kg m-2 yr-1)
Bahia Del Diablo	Glacier	Antarctica	38-112	Terminus mass balance (kg m-2 yr-1)																																-2800	-1300	-1400	-1700						4	-1800
Basodino	Glacier	Switz.	2600-2700	Terminus mass balance (kg m-2 yr-1)																							-2300	-1350	-1200	-1500	-2000	-2200	-1800	-2600	-1100	-2000	-3700	-1440	-2300	-3900	-2080				15	-2098
Bench	Glacier	Canada	1400-1500	Terminus mass balance (kg m-2 yr-1)											-5000	-3850	-4740	-4500	-3750																										5	-4368
Blue	Glacier	US		Terminus mass balance (kg m-2 yr-1)
Bondhusbreen	Glacier	Norway		Terminus mass balance (kg m-2 yr-1)
Breidalblikkbrea	Glacier	Norway	1235-1300	Terminus mass balance (kg m-2 yr-1)																																	-3300	-2000	-2150	-1650					4	-2275
Breidamjok. E.B.	Ice cap	Iceland		Terminus mass balance (kg m-2 yr-1)
Brewster	Glacier	New Zealand	1600-1700	Terminus mass balance (kg m-2 yr-1)																																			-1758	-4029	-4580	-4500			4	-3716.75
Bruarjokull	Ice cap	Iceland		Terminus mass balance (kg m-2 yr-1)
Calderone	Glacier	Italy	2630-2700	Terminus mass balance (kg m-2 yr-1)																															-680	-1746	-357	263	-494						5	-602.8
Careser	Glacier	Italy	2850-2900	Terminus mass balance (kg m-2 yr-1)	-1820	-860	-2410	-1230	-380	-640	360	-270	-1130	-430	-1430	-2490	-1400	-1280	-1600	-1970	-2500	-1720	-1750	-2590	-2630	-2210	-1160	-2910	-1640	-2010	-1930	-2990	-2870	-2230		-2317	-4044	-2359	-3024	-3421	-4257	-3210			37	-1966.27
Charquini Sur	Glacier	Bolivia	4950-5050	Terminus mass balance (kg m-2 yr-1)																																	-1855	-2607	-4608	-315	-138	-683			6	-1701
Chhota Shigri	Glacier	India	4050-4300	Terminus mass balance (kg m-2 yr-1)																																	-3320	-3357	-2187	-3843					4	-3176.75
Ciardoney	Glacier	Italy	2850-2910	Terminus mass balance (kg m-2 yr-1)																														-1828	-260	-1262	-3570	-1570	-2718	-2540	-1836	-2001			9	-1953.89
Columbia (2057)	Glacier	US		Terminus mass balance (kg m-2 yr-1)
Daniels	Glacier	US		Terminus mass balance (kg m-2 yr-1)
Devon NW	Ice cap	Canada	0-100	Terminus mass balance (kg m-2 yr-1)	-1050	-513	-1440	-1239	-1343	-317	-1358	-849	-887	-990	-837	-1390	-1263	-993	-1401	-926	-964	-1406	-1128	-1337	-1450	-870	-940	-1380	-1380	-527	-834	-1750	-1462	-1458											30	-1122.73
Djankuat	Glacier	Russia	2700-2800	Terminus mass balance (kg m-2 yr-1)	-4490	-5200	-4840	-3120	-3550	-2640	-3040	-2660	-3220	-2610	-4150	-3430	-4950	-2920	-3660	-3740	-2340	-3090	-3290	-2710	-4170	-3500	-3380	-5060	-3630	-3380	-3290	-4370	-3380	-3710	-3550	-2670	-2890	-2390	-2950	-10800					36	-3688.06
Dyngjujokull	Ice cap outlet	Iceland		Terminus mass balance (kg m-2 yr-1)
Easton	Glacier	US		Terminus mass balance (kg m-2 yr-1)
Emmons	Glacier	US		Terminus mass balance (kg m-2 yr-1)
Engabreen	Ice cap	Norway	10-200	Terminus mass balance (kg m-2 yr-1)	-9500	-11500	-7490	-12350	-5960	-6400	-6840	-6860	-9720	-11560						-9160	-8100	-10820	-7900	-13150	-10250	-8400	-9800	-7700	-7000	-10100	-10900	-12100	-8800	-9800	-11850	-14300	-11650	-10900							29	-9684.83
Eyjabakkajokull	Ice cap	Iceland		Terminus mass balance (kg m-2 yr-1)
Filleck K.	Glacier	Austria		Terminus mass balance (kg m-2 yr-1)
Findelen	Glacier	Switz.		Terminus mass balance (kg m-2 yr-1)
Fontana Bianca	Glacier	Italy	2850-2950	Terminus mass balance (kg m-2 yr-1)																										-1985	-1851	-2200	-1850	-1428	-289	-1000	-2800	-1400	-2118	-1529	-1267	-1212			13	-1609.92
Foss	Glacier	US		Terminus mass balance (kg m-2 yr-1)
Garabashi	Glacier	Russia	3300-3400	Terminus mass balance (kg m-2 yr-1)														-1530	-2510	-3150	-1100	-1250	-2470	-1810	-2170	-1270	-1590	-2630	-1800	-1650	-1580	-4850	-3630	-4050	-3540	-1560	-1680	-1740	-1930						22	-2249.55
Goldbergkees	Glacier	Austria	2350-2400	Terminus mass balance (kg m-2 yr-1)																															-1363	-1842	-3517	-809	-2470		-1865	-2527			7	-2056.14
Golubin	Glacier	Kirgizstan	3250-3300	Terminus mass balance (kg m-2 yr-1)											-2725	-3004	-3655	-4203	-3838	-3357	-2814	-3935	-2791	-4842																					10	-3516.4
Graafjellsbrea	Glacier	Norway	1050-1100	Terminus mass balance (kg m-2 yr-1)																																	-4900	-4800	-4950			-3300			4	-4487.5
Graasubreen	Glacier	Norway	1830-1900	Terminus mass balance (kg m-2 yr-1)	-440	-760	-1270	190	-2630	-710	-580	-920	310	-1390						-900	480	-1680	740	110	-920	300	450	-400	-100	-790	-1740	-20	-670	0	-600	-1470	-1550	-435	-730			20			31	-584.032
Gries	Glacier	Switz.		Terminus mass balance (kg m-2 yr-1)
Gulkana	Glacier	US (Alaska)		Terminus mass balance (kg m-2 yr-1)
Hamtah	Glacier	India		Terminus mass balance (kg m-2 yr-1)
Hansbreen	Ice cap	Norway (Spitsbergen)	0-100	Terminus mass balance (kg m-2 yr-1)																					-1800	-2560	-2030	-1680	-2300			-2190	-2600	-2430	-2990	-2200	-1920	-1700	-640	-702	-2142				15	-1992.27
Hansebreen	Glacier	Norway	900-950	Terminus mass balance (kg m-2 yr-1)																					-700	-670	920	-1600	-600	-3750	-1000					-4150	-4300	-2250	-2350			-1800			12	-1854.17
Hardangerjokulen	Ice cap	Norway	1020-1100	Terminus mass balance (kg m-2 yr-1)	-5160	-5630	-5150													-5340	-3290	-7800	-2630	-3630	-6300	-4500	-2550	-5900	-6100	-6220	-6950	-4700	-3450	-4100	-8300	-6600	-7500	-6300	-6000			-6700			24	-5450
Hellstugubreen	Glacier	Norway	1450-1500	Terminus mass balance (kg m-2 yr-1)	-2400	-2890	-2650	-2510	-2620	-3220	-2640	-3310	-2540	-3120						-2700	-1390	-3450	-2160	-3020	-2300	-2180	-2420	-2900	-2750	-3280	-5030	-2300	-3100	-2540	-3290	-5020	-3900	-4100	-3528			-2870			31	-2971.87
Helm	Glacier	Canada	1700-1900	Terminus mass balance (kg m-2 yr-1)												-500	-1520	-1000	-2530	-1992	-2151	-1799	-2490															-4650	-5400						10	-2403.2
Hidden	Glacier	Canada	700-800	Terminus mass balance (kg m-2 yr-1)												-1250	-1250	-1750																											3	-1416.67
Hintereisferner	Glacier	Austria	2450-2550	Terminus mass balance (kg m-2 yr-1)	-6250	-4750	-6750	-4270	-4480	-5090	-4200	-3410	-4250	-4230	-4300	-5480	-4430	-3330	-4700	-4720	-4650	-6380	-5350	-5630	-6540	-6526	-6167	-6750	-4869	-5821	-5630	-5900	-5817	-5670	-4750	-6250	-7250	-5250	-7275	-6896	-7750	-6250			38	-5473.97
Hoegtuvbreen	Glacier	Norway	590-650	Terminus mass balance (kg m-2 yr-1)	-3380	-3340	-1610	-2940	-1990	-1630	-3450																																		7	-2620
Hofsjokull E (Thjorsarjokull)	Ice cap outlet	Iceland		Terminus mass balance (kg m-2 yr-1)
Hofsjokull N (Satujokull)	Ice cap outlet	Iceland		Terminus mass balance (kg m-2 yr-1)
Hofsjokull SW (Blagnipujokull)	Ice cap	Iceland		Terminus mass balance (kg m-2 yr-1)
Hurd	Glacier	Antarctica		Terminus mass balance (kg m-2 yr-1)
Ice Worm	Glacier	US		Terminus mass balance (kg m-2 yr-1)
IGAN	Glacier	Russia		Terminus mass balance (kg m-2 yr-1)
Irenebreen	Glacier	Norway (Spitsbergen)		Terminus mass balance (kg m-2 yr-1)
Ivory	Glacier	New Zealand		Terminus mass balance (kg m-2 yr-1)
Jamtalferner	Glacier	Austria	2400-2500	Terminus mass balance (kg m-2 yr-1)																			-3140	-2660	-3620	-3400	-2700	-3090	-1910	-2950	-2560			-2250	-1790	-2720	-5660	-2010	-3740	-4020	-4160	-3186			18	-3087
Johnsons	Glacier	Antarctica		Terminus mass balance (kg m-2 yr-1)
Jostefonn	Glacier	Norway	960-1000	Terminus mass balance (kg m-2 yr-1)																																				-3050	-2900	-3200			3	-3050
Karsojietna	Glacier	Sweden		Terminus mass balance (kg m-2 yr-1)
Kesselwandferner	Glacier	Austria	2600-2800	Terminus mass balance (kg m-2 yr-1)	-5500	-5300	-5550	-2500	-3500	-5370	-4730	-4170	-5620	-6250	-5060	-5420	-4630	-5050	-5110	-6750	-6250	-5750	-5250	-5750	-5620	-5717	-5810	-6400	-4568	-3972	-4750	-5350	-4040	-5150	-3250	-4250	-6280	-3250	-3750	-4250	-6250	-5250			38	-5037.29
Kleinfleisskees	Glacier	Austria	2550-2750	Terminus mass balance (kg m-2 yr-1)																															-2059	-3192	-3223	-1473	-2264		-2702	-628			7	-2220.14
Koeldukvislarj kull	Ice cap	Iceland		Terminus mass balance (kg m-2 yr-1)
Kongsvegen	Ice cap	Norway (Spitsbergen)		Terminus mass balance (kg m-2 yr-1)
Koryto	Glacier	Russia	320-350	Terminus mass balance (kg m-2 yr-1)																										-10000	-8500			-5450											3	-7983.33
Kozelskiy	Glacier	Russia	880-1000	Terminus mass balance (kg m-2 yr-1)																		-350	-200	-200	-100	-130	-150	-120	-230	-350	-120														10	-195
La Conejera	Glacier	Colombia		Terminus mass balance (kg m-2 yr-1)
Langfjordjokelen	Glacier	Norway	300-400	Terminus mass balance (kg m-2 yr-1)																					-3050	-3680	-2550			-4300	-3500					-4800	-4100	-6050	-6000			-3400			10	-4143
Langjokull S. Dome	Ice cap	Iceland		Terminus mass balance (kg m-2 yr-1)
Lemon Creek	Glacier	US (Alaska)		Terminus mass balance (kg m-2 yr-1)
Leviy Aktru	Glacier	Russia	2600-2700	Terminus mass balance (kg m-2 yr-1)																		-1980	-2840		-3400	-3200	-2900	-4100	-4050																7	-3210
Limmern	Glacier	Switz.	2100-2200	Terminus mass balance (kg m-2 yr-1)	-1750	-542	-958	-375	83	-625	-250	281	-500	-250	-781	-938	-1602	-1250	-284																										15	-649.4
Lower Curtis	Glacier	US		Terminus mass balance (kg m-2 yr-1)
Lynch	Glacier	US		Terminus mass balance (kg m-2 yr-1)
Maarmaglaciaren	Glacier	Sweden	1320-1340	Terminus mass balance (kg m-2 yr-1)																									-910	-1070	-400	-1500	-1300	-600	-1310	-890	-2140	-890	-1580	-2940	-460	-1190			14	-1227.14
Maladeta	Glacier	Spain	2775-2875	Terminus mass balance (kg m-2 yr-1)																						-2074	-1958	-1717	-4000	-750	-1470	-3132	-2790	-2709	-2160	-2880	-3870	-3600	-3600	-4104	-2772	-1436			17	-2648.35
Malavalle	Glacier	Italy	2550-2600	Terminus mass balance (kg m-2 yr-1)																																-3790	-3339	-2330	-4189	2575	-3775	-2969			7	-2545.29
Maliy Aktru	Glacier	Russia	2200-2600	Terminus mass balance (kg m-2 yr-1)	-3300	-3100	-4100	-5100	-2740	-2490	490	-3510	-3370	-3340											-4270	-4480	-4330	-4470	-4400	-4660	-4480	-5700	-4350	-4500	-4550			-4680	-4050						23	-3890.43
Martial Este	Glacier	Argentina	980-1000	Terminus mass balance (kg m-2 yr-1)																																-424	-1800	-1819	-2040						4	-1520.75
Marukh	Glacier	Russia	2500-2550	Terminus mass balance (kg m-2 yr-1)	-3080	-3090	-1850	-1950	-4210	-3000	-4020																																		7	-3028.57
McCall	Glacier	US (Alaska)	1400-1500	Terminus mass balance (kg m-2 yr-1)																							-2030	-3170	-2160																3	-2453.33
Midtre Lovenbreen	Glacier	Norway (Spitsbergen)	50-100	Terminus mass balance (kg m-2 yr-1)																										-1582	-1790		-2040												3	-1804
Minaret	Glacier	Canada		Terminus mass balance (kg m-2 yr-1)
Mittivakkat	Glacier	Greenland	150-200	Terminus mass balance (kg m-2 yr-1)																										-2100	-2150	-3550	-3100	-3350	-3500	-2350	-1450	-3500	-4550	-3000	-3600	-3100			13	-3023.08
Mutnovskiy NE	Glacier	Russia		Terminus mass balance (kg m-2 yr-1)
Mutnovskiy SW	Glacier	Russia		Terminus mass balance (kg m-2 yr-1)
Nigardsbreen	Ice cap	Norway	300-400	Terminus mass balance (kg m-2 yr-1)	-11090	-12370	-13900	-12370	-12300	-10100	-9500	-8820	-7930	-11000						-10230	-7520	-12050	-7600	-8700	-9450	-7130	-9100	-8200	-9550	-9700	-11200	-10850	-9800	-9250	-12000	-10950	-10950	-10650	-10500	-11300	-9000	-11500			33	-10198.8
No. 125 (Vodopadniy)	Glacier	Russia	3000-3100	Terminus mass balance (kg m-2 yr-1)																		-570	-790		-1270	-850	-680	-1550	-920	-1150	-1510	-2340	48	-1510											12	-1091
No. 104	Glacier	Russia		Terminus mass balance (kg m-2 yr-1)
No. 356	Glacier	Russia	3860-3900	Terminus mass balance (kg m-2 yr-1)															-1626	-1230	-1142	-2166	-1774																						5	-1587.6
Noisy Creek	Glacier	US		Terminus mass balance (kg m-2 yr-1)
North Klawatti	Glacier	US		Terminus mass balance (kg m-2 yr-1)
Obrucheva	Glacier	Russia		Terminus mass balance (kg m-2 yr-1)
Ochsentaler	Glacier	Switz.	2300-2400	Terminus mass balance (kg m-2 yr-1)																					-3590	-4460	-3750	-5000	-2750	-3750	-2750														7	-3721.43
Pendente	Glacier	Italy	3600-2650	Terminus mass balance (kg m-2 yr-1)																										-1949	-1708	-2995	-1557	-2333	-1087	-2554	-3892	-856	-2089	-2463	-3488	-2228			13	-2246.08
Peyto	Glacier	Canada	2100-2200	Terminus mass balance (kg m-2 yr-1)	-3640	-3110	-3330	-2950		-2820	-3740	-4310	-4250	-4080	-2770	-2300	-2000	-2260	-3780	-3100	-3930	-4240	650	-3970			-3816	-6297	-3176	-2920	-4650	-5240	-2700	-2260	-4240	-3090	-4230	-3100	-4100						32	-3429.66
Place	Glacier	Canada	1800-1900	Terminus mass balance (kg m-2 yr-1)	-1240	-2000	-2170	-1000							-3420	-4000	-2000	-2000	-4000	-3850	-3200	-2500	-4400					-2946	-3771									-3930	-4500						17	-2995.71
Plattalva	Glacier	Switz.	2500-2600	Terminus mass balance (kg m-2 yr-1)	-2186	-884	-1581	326	953	-1279	229	854	-333	354	-812	-729	-812	-271	-30																										15	-413.4
Praviy Aktru	Glacier	Russia	2400-2500	Terminus mass balance (kg m-2 yr-1)																		-5440	-3140																						2	-4290
Rabots Glaciar	Glacier	Sweden	1050-1100	Terminus mass balance (kg m-2 yr-1)																-1833	-1286	-2888	-713	-562	-2500	-2732	-871	-2000	-2125						-2250	-2981	-2980		-3920	-4410		-2400			16	-2278.19
Rainbow	Glacier	US		Terminus mass balance (kg m-2 yr-1)
Ram River	Glacier	Canada	2560-2600	Terminus mass balance (kg m-2 yr-1)	-2110	-1460	-1180	-1070																																					4	-1455
Rhone	Glacier	Switz.	2280-2300	Terminus mass balance (kg m-2 yr-1)										-5160	-5680	-6280																													3	-5706.67
Riukojietna	Ice cap	Sweden	1120-1160	Terminus mass balance (kg m-2 yr-1)																										-750	-1630		-2543	-1706	-2660	-2990	-2010		-880	-2450	-2280	-1190			11	-1917.18
Sandalee	Glacier	US		Terminus mass balance (kg m-2 yr-1)
Sary-Tor	Glacier	Kirgizstan		Terminus mass balance (kg m-2 yr-1)
Sentinel	Glacier	Canada	1500-1700	Terminus mass balance (kg m-2 yr-1)	-1870	-2850	-2070	0							-1860	130	-320	-680	-2980	-2710	-2000	-3034																							12	-1687
Sforzellina	Glacier	Italy		Terminus mass balance (kg m-2 yr-1)
Shaune Garang	Glacier	India		Terminus mass balance (kg m-2 yr-1)
Sholes	Glacier	US		Terminus mass balance (kg m-2 yr-1)
Shumskiy	Glacier	Russia	3040-3060	Terminus mass balance (kg m-2 yr-1)	-2160	-1050	-2340	-2790	-1980	-1730	-2840	-2820	-2070	-2840	-1930	-2560	-2420	-2200	-2120	-2248	-2488	-2090	-2309	-2470	-2971																				21	-2306
Silver	Glacier	US		Terminus mass balance (kg m-2 yr-1)
Silvretta	Glacier	Switz.		Terminus mass balance (kg m-2 yr-1)
Sonnblickkees	Glacier	Austria	2500-2600	Terminus mass balance (kg m-2 yr-1)	-1070	-260	-1580	440	300	116	-341	750	-161	701																															10	-110.5
South Cascade	Glacier	US	1625-1675	Terminus mass balance (kg m-2 yr-1)	-5000	-250	-5500	-5500	-4500	-6500	-5500	-6500	-6500	-5500																															10	-5125
Spoerteggbreen	Glacier	Norway	1260-1300	Terminus mass balance (kg m-2 yr-1)																					-1700																				1	-1700
Storbreen	Glacier	Norway	1350-1450	Terminus mass balance (kg m-2 yr-1)																				-1350	-4370	-2350	-1950	-2500	-2840	-3700	-3350	-2260	-2120	-2630	-3060	-3607	-3318	-2554	-2445			-2300			17	-2747.29
Storglaciaren	Glacier	Sweden	1140-1160	Terminus mass balance (kg m-2 yr-1)	-1418	-2187	-381	-1265	433						-767	-500	-830	-450	-1758	-1216	-250	-1992	258	225	-1040	-72	880	-1040	-1250	-1380	-690	-2450	-2480	-70	-1620	-2810	-3490	-1300	-2330	-3810	-270	-1440			33	-1174.55
Storglombreen	Glacier	Norway	520-600	Terminus mass balance (kg m-2 yr-1)																		-7620														-8250	-8250	-7300	-8700						5	-8024
Storsteinsfjellbreen	Glacier	Norway	970-1000	Terminus mass balance (kg m-2 yr-1)																					-2450	-1250	-1600	-2700	-1800																5	-1960
Superguksoak	Glacier	Canada	600-700	Terminus mass balance (kg m-2 yr-1)												-201	-262	-530																											3	-331
Suyok Zapadniy	Glacier	Russia	3840-3900	Terminus mass balance (kg m-2 yr-1)														-2111					-448																						2	-1279.5
Svartisheibreen	Glacier	Norway	770-800	Terminus mass balance (kg m-2 yr-1)																					-4350	-1600	-1600	-2200																	4	-2437.5
Tarfalaglaciaren	Glacier	Sweden	1350-1400	Terminus mass balance (kg m-2 yr-1)																														390	-1310		-800	-660	-1670	-3220	-120	-580			8	-996.25
Trollbergdalsbreen	Glacier	Norway	900-950	Terminus mass balance (kg m-2 yr-1)	-370	-2510	540	-1010	-900															-450	-950	800	-50	-2000																	11	-1030.91
Ts. Tuyuksuyskiy	Glacier	Russia	3400-3500	Terminus mass balance (kg m-2 yr-1)	-1390	-1380	-1970	-1590	-1830	-1720	-2560	-2800	-1630	-2080	-1130	-1840	-1570	-1720	-1850	-1690	-1130	-2030	-1540	-3000	-2490	-1820	-993	-2004	-2513	-2161	-3634	-2266	-1660	-1755	-1865	-2200	-1050	-1190	-2014	-2562	-3059	-3356			39	-1961.08
Tungnaarjokull	Ice cap	Iceland		Terminus mass balance (kg m-2 yr-1)
Urumqihe S. No. 1	Glacier	China		Terminus mass balance (kg m-2 yr-1)																			-1443	-1672.5	-2680	-1943	-2354.5	-2743	-2053	-1655	-3565.5	-3582.5	-3641	-2480.5	-3100			-2435	-2055	-3086	-3070	-3079.5			18	-2591.06
Vermuntglacier	Glacier	Austria	2500-2600	Terminus mass balance (kg m-2 yr-1)																					-3120	-3490	-2240	-2580	-1710	-2590	-2170														7	-2557.14
Vernagtferner	Glacier	Austria	2700-2800	Terminus mass balance (kg m-2 yr-1)	-3750	-2750	-3333	-2142	-2513	-2250	-1555	-1652	-2170	-752	-3150	-3110	-2419	-2000	-1800	-3251	-2800	-3095	3202	-3202	-4569	-3470	-2964	-4751	-2202	-3249	-3059	-3821	-3435	-4060	-3100	-3600	-5200	-3040	-3377	-3382	-3938	-3531			39	-2902.77
Waldemarbreen	Glacier	Norway (Spitsbergen)	125-200	Terminus mass balance (kg m-2 yr-1)																														-1000	-1130	-1156	-1162	-1566	-1658						6	-1278.67
Watson	Glacier	US		Terminus mass balance (kg m-2 yr-1)
White	Glacier	Canada	0-200	Terminus mass balance (kg m-2 yr-1)	-1937	-1463	-1152	-1399	-1538	-1246	-2365	-1821	-1428				-1861	-1945	-1972	-2974	-3688	-1203	-1165	-2259	-2115	-1511	-2377	-2618	-2691	-1027	-1630	-2829	-2175	-2138	-1437	-1817	-1574	-1724	-3117	-1904	-3507				35	-1969.8
Wolverine	Glacier	US (Alaska)		Terminus mass balance (kg m-2 yr-1)
Woolsey	Glacier	Canada	1920-2000	Terminus mass balance (kg m-2 yr-1)	-1540	-1620		-1370																																					3	-1510
Wurtenkees	Glacier	Austria	2500-2550	Terminus mass balance (kg m-2 yr-1)													-2973	-1473	-2328		-2454	-2241	-1270	-2002	-2461	-2925	-1653	-2702	-1976	-1800	-926	-2236	-2796	-2899	-1565	-2971	-4302	-1700	-1976		-2814	-3085			24	-2313.67
Xiaodongkemadi	Glacier	China		Terminus mass balance (kg m-2 yr-1)
Yawning	Glacier	US		Terminus mass balance (kg m-2 yr-1)
Yuri	Glacier	Canada	1300-1400	Terminus mass balance (kg m-2 yr-1)											-1500	-2000	-2000	-1230																											4	-1682.5
Zavisha	Glacier	Canada	2000-2100	Terminus mass balance (kg m-2 yr-1)											-1240	-1500	-500	-500	-1500																										5	-1048
Zongo	Glacier	Bolivia	4900-5000	Terminus mass balance (kg m-2 yr-1)																						-3265	-3265	-5403	-6680	-6420	-3291			-6194	-4715	-5044	-5117	-4545	-7149	-183	-210	-4354			15	-4389
Number of observations					30	30	29	29	24	23	23	21	21	20	22	25	26	27	23	25	26	32	33	29	38	37	41	41	41	41	41	32	33	37	37	42	47	49	51	31	29	34	0	0
Mean					-3128.7	-2948.3	-3092.59	-2607.38	-2568.96	-2717	-2804.35	-2845.57	-2971.38	-3475.35	-2701.91	-2619.68	-2368.35	-1950.96	-2628.57	-3423.88	-2714.5	-3658.09	-2150.64	-2973.5	-3208.58	-2780.14	-2414.84	-3263.44	-2816.1	-3126.17	-3142.84	-3613.39	-2888.88	-2953.88	-3122.49	-3560.05	-3862.19	-3058.49	-3319.67	-3189.39	-2910.72	-3003.99
Std deviation					2510.69	2863.08	2912.23	3098.46	2740.61	2537.39	2513.21	2534.31	2676.98	3346.53	1592.41	1816.88	1512.39	1258.84	1427.14	2381.43	2119.42	2768.8	2249.96	2796.92	2238.81	2049.25	2360.06	2059.38	1994.5	2504.7	2628.82	2508.84	2044.43	2218.9	2686.46	2647.94	2404.34	2306.22	2095.3	2717.33	2163.46	2143.81
Std error					458.387	522.725	540.787	575.369	559.425	529.082	524.04	553.031	584.166	748.307	339.503	363.377	296.603	242.264	297.579	476.286	415.653	489.46	391.668	519.376	363.184	336.895	368.58	321.621	311.488	391.169	410.552	443.504	355.889	364.786	441.651	408.586	350.709	329.461	293.401	488.048	401.744	367.66
The terminus mass balance data are from World Glacier Monitoring Service (WGMS).
The terminus elevation band varies in elevation through time due to glacier retreat, here indicated by its lower and upper bands.
The trend for 1971-2010 is: y = -13.1x - 2708; r2 = 0.13; insignificant
The trend for 1971-1990 is: y = 6.2x - 2882; r2 < 0.01; insignificant
The trend for 1991-2010 is: y = -17.7x - 2956; r2 = 0.08; insignificant
Decades	Mean terminus mass balance	Std deviation	Std error
1971-1980	-2915.96	272.054	86.0309
1981-1990	-2719.01	526.81	166.592
1991-2000	-3020.83	326.63	103.29
2001-2010	-3253.37	318.01	106.003
